# Supplementary material for: Specific G-quadruplex ligands modulate the alternative splicing of Bcl-X
Source: Oxford University Press journal article supplement (doi:10.1093/nar/gkx1122), 2017-10-26
Supplement: gkx1122_supp.zip [file gkx1122_supp.zip]

## Supplementary Material

### Specific G-quadruplex ligands modulate the alternative splicing of Bcl-X

**Carika Weldon<sup>1</sup>, Justine G. Dacanay<sup>1</sup>, Vijay Gokhale<sup>2</sup>, P. Venkat L. Boddupally<sup>3</sup>, Isabelle Behm-Ansmant<sup>4</sup>, Glenn A. Burley<sup>5</sup>, Christiane Branlant<sup>4</sup>, Laurence H. Hurley<sup>2,6</sup>, Cyril Dominguez<sup>1\*</sup>, Ian C. Eperon<sup>1\*</sup>**

<sup>1</sup> Leicester Institute of Structural & Chemical Biology and Department of Molecular & Cell Biology, University of Leicester, Leicester, UK

<sup>2</sup> College of Pharmacy and College of Pharmacy and BIO5 Institute, University of Arizona, Tucson, Arizona 85721, United States

<sup>3</sup> Fluoroorganic Division, CSIR-Indian Institute of Chemical Technology, Hyderabad, India-500 007

<sup>4</sup> IMoPA (Ingénierie Moléculaire et Physiopathologie Articulaire), UMR 7365 CNRS-UL, Biopôle de l'Université de Lorraine, 9 Avenue de la Forêt de Haye, 54505 Vandoeuvre-lès-Nancy, France

<sup>5</sup> Department of Pure and Applied Chemistry, University of Strathclyde, UK

<sup>6</sup> Arizona Cancer Center, University of Arizona, Tucson, Arizona 85724, United States

## SUPPLEMENTARY MATERIALS AND METHODS

### Syntheses and characterization of ellipticines

#### GSA-1113

To a solution of 9-methoxy-5,11-dimethyl-6H-pyrido[4,3-*b*]carbazole (500 mg, 1.81 mmol) in DMF (20 mL) was added sodium hydride (173 mg, 7.24 mmol) at 0 °C over a period of 10 min. then the reaction mixture was stirred at the same temperature for 1 h. To this reaction mixture, dimethylaminoethylbromide hydrobromide (632 mg, 2.71 mmol) was added and the stirring was continued for overnight at room temperature. After completion of the reaction, as indicated by TLC (10 % MeOH in DCM) the reaction mixture was poured on to cold water and neutralized with ammonium chloride solution. Aqueous layer was extracted with ethyl acetate (2x 100 mL), the combined organic layer was washed with water (2 x 200 mL), dried over anhydrous sodium sulfate and finally distilled under vacuum to get crude product. Then the crude product was purified on Biotage column purification system using 2-10 % MeOH in DCM as a gradient solvent system to yield 60 mg of GSA1113.

**<sup>1</sup>H-NMR (CDCl<sub>3</sub>, 300 MHz):** δ 9.70 (s, 1H, ArH), 8.51 (d, *J* = 6.0 Hz, 1H, ArH), 8.00-7.87 (m, 2H, ArH), 7.38 (d, *J* = 8.7 Hz, 1H, ArH), 7.22 (dd, *J* = 2.1 & 8.7 Hz, 1H, ArH), 4.63 (t, *J* = 7.8 Hz, 2H), 3.98 (s, 3H), 3.24 (s, 3H), 3.01 (s, 3H), 2.75 (t, *J* = 7.9 Hz, 2H), 2.40 (s, 6H).

**<sup>13</sup>C-NMR (CDCl<sub>3</sub>):** 154.41, 150.18, 142.03, 141.46, 139.76, 134.80, 129.49, 125.28, 124.84, 116.30, 114.88, 109.44, 108.72, 58.64, 56.69, 46.44, 45.13, 15.10, 13.93.

**HPLC Purity:** Zorbax SB C18, 4.6 x150 mm, 3.5 μ, Mobile phase: 30/70/0.25, MeOH: water: HCOOH, Flow rate: 0.5 mL/min. 100 % (R.T. : 6.752 min)

**HRMS:** Found = 348.2065 (MH<sup>+</sup>) (Theoretically = 348.2070) Error = 1.4 ppm

#### GSA-1126

5,11-Dimethyl-6H-pyrido[4,3-*b*]carbazol-9-ol (558 mg, 2.12 mmol) was dissolved in *tert.* butanol and ethanol (15 mL + 15 mL) solvent and potassium. *tert.* butoxide (715 mg, 6.38 mmol) was added to that mixture. After 1 hr, *N,N*-diethylamino ethyl bromide hydrobromide (720 mg, 2.76 mmol) was added and the reaction mixture was refluxed at 80 °C for overnight. After completion of the reaction, the mixture was poured on to ice cold water and neutralized with ammonium chloride. The aqueous layer was extracted with ethyl acetate. The ethyl acetate layers were combined, dried with anhydrous sodium sulfate and concentrated. This crude material was purified by Biotage column chromatography using 15% methanol in CHCl<sub>3</sub> as an eluent to afford the pure product (80 mg, 10.41 %) as yellow solid.

**<sup>1</sup>H-NMR (DMSO, 300 MHz):**  $\delta$  11.20 (s, 1H, NH), 9.67 (s, 1H, ArH), 8.40 (d, J = 5.7 Hz, 1H, ArH), 7.93-7.83 (m, 2H, ArH), 7.52-7.43 (m, 1H, ArH), 7.22-7.14 (m, 1H, ArH), 4.16 (t, J = 4.8 Hz, 2H), 3.24 (s, 3H), 2.84 (t, J = 4.8 Hz, 2H), 2.75 (s, 3H), 2.68-2.54 (m, 4H), 1.08-0.94 (m, 6H).

**<sup>13</sup>C-NMR (DMSO, 75 MHz):** 153.17, 150.60, 142.05, 141.26, 138.20, 133.17, 129.04, 124.40, 124.25, 122.53, 116.73, 116.62, 111.98, 109.57, 108.72, 68.15, 52.49, 47.91, 15.13 12.74.

**HPLC Purity:** Column: Zorbax SB C18, Mobile phase: 35/65/0.25. MeOH: water: formic acid, Retention time: 7.42. Purity: 98.11 %

**HRMS:** Found 362.2225 (Theoretically = 362.2232) Error = 0.6 ppm

### GSA-1133

5,11-Dimethyl-6H-pyrido[4,3-b]carbazol-9-ol (500 mg, 1.90 mmol) was dissolved in *tert.* butanol and ethanol (15 mL + 15 mL) solvent and potassium. *tert.* butoxide (641 mg, 5.72 mmol) was added to that mixture. After 1 hr, 1-(2-bromoethyl) pyrrolidine hydrobromide (642 mg, 2.48 mmol) was added and the reaction mixture was reacted at room temperature for 4 h. After completion of the reaction, the mixture was poured on to ice cold water and neutralized with ammonium chloride. The aq. layer was extracted with ethyl acetate. The ethyl acetate layers were combined, dried with anhydrous sodium sulfate and concentrated. This crude material was purified by Biotage column chromatography using 8% methanol in CHCl<sub>3</sub> as an eluent to afford the pure product (60 mg, 8.7 %) as yellow solid.

**<sup>1</sup>H-NMR (DMSO, 300 MHz):**  $\delta$  11.22 (s, 1H, NH), 9.68 (s, 1H, ArH), 8.40 (d, J = 6.0 Hz, 1H, ArH), 7.94-7.84 (m, 2H, ArH), 7.47 (d, J = 8.7 Hz, 1H, ArH), 7.19 (dd, J = 8.7 Hz, 1H, ArH), 4.21 (t, J = 6.0 Hz, 2H), 3.25 (s, 3H), 2.88 (t, J = 6.0 Hz, 2H), 2.76 (s, 3H), 2.65-2.54 (m, 4H), 1.65-1.77 (m, 4H).

**<sup>13</sup>C-NMR (DMSO, 75 MHz):** 153.14, 150.62, 142.07, 141.27, 138.23, 133.19, 129.09, 124.43, 124.27, 122.55, 116.66, 111.99, 109.61, 108.74, 68.42, 55.49, 54.94, 24.03, 15.15, 12.77.

**HPLC Purity:** Zorbax SB C18, Mobile phase: 35/65/0.25. MeOH: water: formic acid, Retention time: 6.32. Purity: 100 %

**HRMS:** Found 360.2070 (Theoretically = 360.2076) Error = 0.3 ppm

### GSA-1135

5, 11-Dimethyl-6H-pyrido [4, 3-b] carbazol-9-ol (500 mg, 1.90 mmol) was dissolved in *tert.* butanol and ethanol (15 mL + 15 mL) solvent and potassium. *tert.* butoxide (641 mg, 5.72 mmol) was added to that mixture. After 1 hr 1-(2-chloroethyl) piperidine hydrochloride (456 mg, 2.48 mmol) was added and the

reaction mixture was refluxed at 80°C for overnight. After completion of the reaction, the mixture was poured on to ice cold water and neutralized with ammonium chloride. The aq. layer was extracted with ethyl acetate. The ethyl acetate layers were combined, dried with anhydrous sodium sulfate and concentrated. This crude material was purified by Biotage column chromatography using 8% methanol in CHCl<sub>3</sub> as an eluent to afford the pure product (50 mg, 7.0 %) as yellow solid.

**<sup>1</sup>H-NMR (DMSO, 300 MHz):** δ 11.21 (s, 1H, NH), 9.68 (s, 1H, ArH), 8.40 (d, J = 5.4 Hz, 1H, ArH), 7.94-7.84 (m, 2H, ArH), 7.46 (d, J = 8.7 Hz, 1H, ArH), 7.19 (d, J = 8.7 Hz, 1H, ArH), 4.21 (t, J = 5.4 Hz, 2H), 3.25 (s, 3H), 2.85-2.70 (m, 5H), 2.57-2.44 (m, 4H), 1.60-1.48 (m, 4H), 1.47-1.35 (m, 2H).

**<sup>13</sup>C-NMR (DMSO, 75 MHz):** 153.14, 150.61, 142.06, 141.27, 138.23, 133.19, 129.08, 124.41, 124.27, 122.54, 116.76, 116.64, 111.98, 109.64, 108.73, 67.30, 58.51, 55.35, 26.40, 24.76, 15.16, 12.77.

**HPLC Purity:** Zorbax SB C18, Mobile phase: 40/60/0.25. MeOH: water: formic acid, Retention time: 5.60. Purity: 98.45 %

**HRMS:** Found 374.2226 (Theoretically = 374.2232) Error = -1.5 ppm

## SUPPLEMENTARY TABLES

| Structure class                      | Name                               | [G4L]<br>( $\mu$ M) | $X_S/(X_S+X_L)$  | P value                   | Relative<br>level of $X_S$ | Relative<br>level of $X_L$ |
|--------------------------------------|------------------------------------|---------------------|------------------|---------------------------|----------------------------|----------------------------|
| Porphyrin                            | TMPyP4                             | 0                   | 0.15 $\pm$ 0.02  | 0.0003<br>0.02            | -                          | -                          |
|                                      |                                    | 5                   | 0.33 $\pm$ 0.02  |                           | 0.63                       | 0.24                       |
|                                      |                                    | 10                  | 0.28 $\pm$ 0.05  |                           | 0.49                       | 0.23                       |
|                                      |                                    | 25                  | N/A              |                           | 0                          | 0                          |
| Fluoro-quinolone                     | Quarfloxin                         | 0                   | 0.15 $\pm$ 0.02  | 0.03<br>0.03<br>0.2       | -                          | -                          |
|                                      |                                    | 1                   | 0.12 $\pm$ 0.01  |                           | 1                          | 1                          |
|                                      |                                    | 10                  | 0.12 $\pm$ 0.004 |                           | 1                          | 1                          |
|                                      |                                    | 40                  | 0.14 $\pm$ 0.01  |                           | 1                          | 1                          |
| Phthalocyanine                       | Zn-DIGP                            | 0                   | 0.34 $\pm$ 0.06  | 0.99<br>0.0008            | -                          | -                          |
|                                      |                                    | 1                   | 0.34 $\pm$ 0.07  |                           | 0.75                       | 0.77                       |
|                                      |                                    | 5                   | 0                |                           | 0                          | 0.26                       |
|                                      |                                    | 10                  | N/A              |                           | 0                          | 0                          |
| Benzothiazole                        | Thioflavin<br>T (ThT)              | 0                   | 0.14 $\pm$ 0.01  | 0.97<br>0.06<br>0.008     | -                          | -                          |
|                                      |                                    | 1                   | 0.14 $\pm$ 0.06  |                           | 1                          | 1                          |
|                                      |                                    | 10                  | 0.17 $\pm$ 0.01  |                           | 1                          | 1                          |
|                                      |                                    | 50                  | 0.22 $\pm$ 0.02  |                           | 0.82                       | 0.50                       |
| Quinoliny-pyridine-<br>dicarboxamide | Pyridostatin<br>(PDS)              | 0                   | 0.36 $\pm$ 0.05  | 0.1<br>0.0002             | -                          | -                          |
|                                      |                                    | 1                   | 0.30 $\pm$ 0.01  |                           | 0.61                       | 0.80                       |
|                                      |                                    | 5                   | 0                |                           | 0                          | 0.24                       |
|                                      |                                    | 10                  | N/A              |                           | 0                          | 0                          |
| Quinoliny-pyridine-<br>dicarboxamide | Carboxy-<br>pyridostatin<br>(cPDS) | 0                   | 0.36 $\pm$ 0.5   | 0.3<br>0.7<br>0.05        | -                          | -                          |
|                                      |                                    | 1                   | 0.32 $\pm$ 0.01  |                           | 1                          | 1                          |
|                                      |                                    | 5                   | 0.33 $\pm$ 0.11  |                           | 1                          | 1                          |
|                                      |                                    | 10                  | 0.21 $\pm$ 0.08  |                           | 0.30                       | 0.62                       |
| Naphthyridine                        | 3AQN                               | 0                   | 0.17 $\pm$ 0.03  | 0.5<br>0.8<br>0.4         | -                          | -                          |
|                                      |                                    | 1                   | 0.19 $\pm$ 0.03  |                           | 1                          | 1                          |
|                                      |                                    | 5                   | 0.17 $\pm$ 0.04  |                           | 0.46                       | 0.44                       |
|                                      |                                    | 10                  | N/A              |                           | 0                          | 0                          |
| Naphthyridine                        | 6AQN                               | 0                   | 0.17 $\pm$ 0.03  | 0.5<br>0.1<br>0.2         | -                          | -                          |
|                                      |                                    | 1                   | 0.15 $\pm$ 0.01  |                           | 1                          | 1                          |
|                                      |                                    | 5                   | 0.22 $\pm$ 0.03  |                           | 1                          | 0.62                       |
|                                      |                                    | 10                  | 0.20 $\pm$ 0.03  |                           | 0.52                       | 0.40                       |
| Bisquinolinium<br>pyridines          | 360A                               | 0                   | 0.17 $\pm$ 0.03  | 0.3<br>0.9<br>0.3         | -                          | -                          |
|                                      |                                    | 1                   | 0.14 $\pm$ 0.02  |                           | 1                          | 1                          |
|                                      |                                    | 5                   | 0.17 $\pm$ 0.02  |                           | 1                          | 1                          |
|                                      |                                    | 10                  | 0.19 $\pm$ 0.01  |                           | 0.65                       | 0.56                       |
| Ellipticine                          | GQC-05                             | 0                   | 0.15 $\pm$ 0.01  | 0.004<br>0.04<br>0.000001 | -                          | -                          |
|                                      |                                    | 1                   | 0.10 $\pm$ 0.01  |                           | 1                          | 1                          |
|                                      |                                    | 10                  | 0.28 $\pm$ 0.07  |                           | 1.82                       | 1                          |
|                                      |                                    | 40                  | 0.80 $\pm$ 0.02  |                           | 2.86                       | 0.13                       |
| Quindoline                           | SYUIQ-5                            | 0                   | 0.23 $\pm$ 0.03  | 0.006                     | -                          | -                          |
|                                      |                                    | 40                  | 0.41 $\pm$ 0.05  |                           | 1.82                       | 1                          |
| 11-piperaziny-<br>quindolines        | GSA-0902                           | 0                   | 0.17 $\pm$ 0.04  | 0.08<br>0.01<br>0.006     | -                          | -                          |
|                                      |                                    | 1                   | 0.11 $\pm$ 0.02  |                           | 0.20                       | 1                          |
|                                      |                                    | 10                  | 0.06 $\pm$ 0.004 |                           | 0.34                       | 1                          |
|                                      |                                    | 40                  | 0.04 $\pm$ 0.01  |                           | 0.18                       | 1                          |

**Supplementary Table 1.** Effects of a variety of G4 ligands on the splicing of Bcl-X-681 *in vitro*. The chemical class of the ligand, its specific name and its concentrations in the splicing reaction are shown. The yields of splicing were calculated as in Materials and Methods.  $X_S/(X_S+X_L)$  shows the proportion of the  $X_S$  isoform in the mRNA. The significance of the difference in the mean value from the mean of the control reaction done in the same experiment (boxed) was tested using Student's *t* test (*P*). The relative level is the yield of each isoform compared to the control.

| Name       | [G4L] $\mu$ M | $X_S/(X_S+X_L)$  | P value | Relative level of $X_S$ | Relative level of $X_L$ |
|------------|---------------|------------------|---------|-------------------------|-------------------------|
| -          | 0             | $0.23 \pm 0.03$  |         | -                       | -                       |
| quindoline | 40            | $0.30 \pm 0.01$  | 0.02    | 1.59                    | 1                       |
| SYUIQ-5    | 40            | $0.41 \pm 0.05$  | 0.006   | 1.82                    | 1                       |
| -          | 0             | $0.21 \pm 0.01$  |         | -                       | -                       |
| GSA-0819   | 1             | $0.16 \pm 0.04$  | 0.09    | 0.72                    | 1                       |
|            | 10            | $0.14 \pm 0.01$  | 0.0006  | 0.69                    | 1                       |
|            | 40            | $0.22 \pm 0.02$  | 0.5     | 1                       | 1                       |
| GSA-0820   | 1             | $0.18 \pm 0.06$  | 0.4     | 1                       | 1                       |
|            | 10            | $0.08 \pm 0.01$  | 0.0001  | 0.33                    | 1                       |
|            | 40            | $0.06 \pm 0.01$  | 0.0001  | 0.22                    | 1                       |
| GSA-0825   | 1             | $0.14 \pm 0.01$  | 0.003   | 1                       | 1                       |
|            | 10            | $0.18 \pm 0.04$  | 0.2     | 1                       | 1                       |
|            | 40            | $0.15 \pm 0.01$  | 0.004   | 1                       | 1                       |
| -          | 0             | $0.17 \pm 0.04$  |         | -                       | -                       |
| GSA-0902   | 1             | $0.11 \pm 0.02$  | 0.08    | 0.67                    | 1                       |
|            | 10            | $0.06 \pm 0.004$ | 0.01    | 0.34                    | 1                       |
|            | 40            | $0.04 \pm 0.01$  | 0.007   | 0.18                    | 1                       |
| GSA-0903   | 1             | $0.12 \pm 0.01$  | 0.1     | 0.83                    | 1                       |
|            | 10            | $0.13 \pm 0.01$  | 0.1     | 0.83                    | 1                       |
|            | 40            | $0.13 \pm 0.01$  | 0.2     | 0.83                    | 1                       |
| GSA-0924   | 1             | $0.12 \pm 0.01$  | 0.1     | 0.78                    | 1                       |
|            | 10            | $0.12 \pm 0.01$  | 0.1     | 0.75                    | 1                       |
|            | 40            | $0.11 \pm 0.01$  | 0.08    | 0.63                    | 1                       |
| -          | 0             | $0.19 \pm 0.01$  |         | -                       | -                       |
| GSA-0925   | 1             | $0.14 \pm 0.005$ | 0.001   | 0.73                    | 1                       |
|            | 10            | $0.11 \pm 0.02$  | 0.003   | 0.52                    | 1                       |
|            | 40            | $0.09 \pm 0.03$  | 0.004   | 0.45                    | 1                       |
| GSA-0927   | 1             | $0.12 \pm 0.01$  | 0.0006  | 0.56                    | 1                       |
|            | 10            | $0.12 \pm 0.01$  | 0.001   | 0.61                    | 1                       |
|            | 40            | $0.10 \pm 0.03$  | 0.006   | 0.53                    | 1                       |
| GSA-0932   | 1             | $0.13 \pm 0.02$  | 0.005   | 0.65                    | 1                       |
|            | 10            | $0.11 \pm 0.03$  | 0.006   | 0.54                    | 1                       |
|            | 40            | $0.10 \pm 0.03$  | 0.005   | 0.48                    | 1                       |
| -          | 0             | $0.15 \pm 0.01$  |         | -                       | -                       |
| GSA-0933   | 1             | $0.14 \pm 0.003$ | 0.05    | 0.88                    | 1                       |
|            | 10            | $0.10 \pm 0.03$  | 0.03    | 0.65                    | 1                       |
|            | 40            | $0.15 \pm 0.01$  | 0.5     | 1                       | 1                       |
| GSA-1013   | 1             | $0.12 \pm 0.01$  | 0.02    | 0.75                    | 1                       |
|            | 10            | $0.12 \pm 0.01$  | 0.009   | 0.81                    | 1                       |
|            | 40            | $0.14 \pm 0.01$  | 0.1     | 1                       | 1                       |
| GSA-1015   | 1             | $0.14 \pm 0.02$  | 0.3     | 0.85                    | 1                       |
|            | 10            | $0.13 \pm 0.01$  | 0.07    | 0.81                    | 1                       |
|            | 40            | $0.13 \pm 0.01$  | 0.06    | 0.76                    | 1                       |

**Supplementary Table 2.** Effects of quindolines on the splicing of Bcl-X-681 *in vitro*. The values shown are as described in the legend to Supplementary Table 1.

| Compound   | $X_S/(X_S+X_L)$<br>(DMSO control) | Standard deviation | $X_S/(X_S+X_L)$<br>(Treated) | Standard deviation<br>(Treated) | <i>P</i> value |
|------------|-----------------------------------|--------------------|------------------------------|---------------------------------|----------------|
| GQC-05     | 0.173                             | 0.008              | 0.543                        | 0.027                           | <0.0001*       |
| GSA-1112   | 0.169                             | 0.018              | 0.226                        | 0.056                           | 0.236          |
| GSA-1113   | 0.174                             | 0.017              | 0.264                        | 0.024                           | 0.011          |
| GSA-1125   | 0.161                             | 0.016              | 0.392                        | 0.088                           | 0.022          |
| GSA-1126   | 0.172                             | 0.023              | 0.255                        | 0.005                           | 0.007*         |
| GSA-1133   | 0.098                             | 0.028              | 0.255                        | 0.032                           | 0.006*         |
| GSA-1135   | 0.112                             | 0.024              | 0.195                        | 0.045                           | 0.081          |
| Quindoline | 0.092                             | 0.007              | 0.138                        | 0.031                           | 0.107          |
| GSA-0819   | 0.111                             | 0.015              | 0.125                        | 0.011                           | 0.355          |
| GSA-0820   | 0.096                             | 0.003              | 0.173                        | 0.015                           | 0.002*         |
| GSA-0825   | 0.106                             | 0.018              | 0.188                        | 0.035                           | 0.044          |
| GSA-0902   | 0.062                             | 0.020              | 0.062                        | 0.005                           | 0.997          |
| GSA-0903   | 0.128                             | 0.007              | 0.194                        | 0.014                           | 0.004*         |
| GSA-0924   | 0.115                             | 0.009              | 0.110                        | 0.006                           | 0.519          |
| GSA-0925   | 0.055                             | 0.006              | 0.167                        | 0.105                           | 0.208          |
| GSA-0927   | 0.069                             | 0.009              | 0.115                        | 0.021                           | 0.048          |
| GSA-0932   | 0.123                             | 0.023              | 0.098                        | 0.013                           | 0.259          |
| GSA-0933   | 0.119                             | 0.020              | 0.174                        | 0.006                           | 0.018          |
| GSA-1013   | 0.081                             | 0.009              | 0.110                        | 0.009                           | 0.038          |
| GSA-1015   | 0.080                             | 0.011              | 0.127                        | 0.005                           | 0.005*         |
| SYUIQ-5    | 0.089                             | 0.009              | 0.080                        | 0.009                           | 0.350          |
| Quarfloxin | 0.111                             | 0.016              | 0.122                        | 0.007                           | 0.418          |
| ThT        | 0.200                             | 0.030              | 0.218                        | 0.062                           | 0.733          |
| Zn-DIGP    | 0.048                             | 0.010              | 0.043                        | 0.010                           | 0.636          |
| TmPyP4     | 0.084                             | 0.012              | 0.065                        | 0.011                           | 0.179          |
| PDS        | 0.103                             | 0.014              | 0.122                        | 0.025                           | 0.405          |
| cPDS       | 0.103                             | 0.019              | 0.109                        | 0.008                           | 0.687          |
| 3AQN       | 0.039                             | 0.009              | 0.036                        | 0.014                           | 0.800          |
| 6AQN       | 0.046                             | 0.013              | 0.044                        | 0.007                           | 0.840          |
| 360A       | 0.231                             | 0.030              | 0.176                        | 0.032                           | 0.147          |

**Supplementary Table 3.** Effects of G4 ligands on the splicing of Bcl-X in HeLa cells. The significance of the effects was tested using Student's *t* test (*P*). An asterisk indicates *P* < 0.01. Only GQC-05 and GSA-1133 show significant changes with a greater than two-fold increase in  $X_S$ .

**A**

| Pre-mRNA | No GQC-05                    |           | + GQC-05                |                     |
|----------|------------------------------|-----------|-------------------------|---------------------|
|          | $X_S$                        | $X_L$     | $X_S$                   | $X_L$               |
|          | Change relative to Bcl-X-681 |           | Change caused by GQC-05 |                     |
| Q2.1     | Increase                     | No change | Increase                | Decrease            |
| Q4.1     | No change                    | No change | Increase                | Decrease            |
| Q5.1     | No change                    | Decrease  | Increase                | Decrease            |
|          | Change relative to QN.1      |           | Change caused by GQC-05 |                     |
| Q2.2     | Decrease                     | No change | No or less increase     | Decrease            |
| Q4.2     | No change                    | No change | Increase                | Decrease            |
| Q5.2     | No change                    | Increase  | Increase                | No or less decrease |

**B**

| Pre-mRNA  | No GQC-05                  |       |               |        | + GQC-05              |       |                            |        |
|-----------|----------------------------|-------|---------------|--------|-----------------------|-------|----------------------------|--------|
|           | Splice site usage (%)      |       | <i>t</i> test |        | Splice site usage (%) |       | <i>t</i> test vs no GQC-05 |        |
|           | $X_S$                      | $X_L$ | $pX_S$        | $pX_L$ | $X_S$                 | $X_L$ | $pX_S$                     | $pX_L$ |
| Bcl-X-681 | 3.7                        | 34.7  |               |        | 11.3                  | 7.0   | 0.048                      | 0.001  |
|           | <i>t</i> test vs Bcl-X-681 |       |               |        |                       |       |                            |        |
| Q2.1      | 6.9                        | 35.1  | 0.000         | 0.914  | 14.2                  | 3.8   | 0.001                      | 0.000  |
| Q4.1      | 3.7                        | 42.8  | 0.948         | 0.058  | 6.7                   | 11.6  | 0.036                      | 0.000  |
| Q5.1      | 3.1                        | 38.8  | 0.379         | 0.257  | 3.7                   | 11.2  | 0.288                      | 0.000  |
|           | <i>t</i> test vs QN.1      |       |               |        |                       |       |                            |        |
| Q2.2      | 5.7                        | 30.9  | 0.001         | 0.198  | 4.9                   | 4.5   | 0.521                      | 0.000  |
| Q4.2      | 5.2                        | 36.2  | 0.138         | 0.058  | 9.0                   | 11.8  | 0.023                      | 0.000  |
| Q5.2      | 3.9                        | 40.5  | 0.188         | 0.477  | 5.4                   | 23.8  | 0.012                      | 0.001  |

**Supplementary Table 4.** Predicted and measured effects on splicing of mutations in the potential quadruplex-forming regions of Bcl-X. (A) Predictions for the behaviour of the  $X_S$  and  $X_L$  splice sites were based on the model described in the Discussion, i.e., that secondary structure occludes the  $X_S$  5'SS but Q2 G4 formation would make it more accessible, and that Q5 G4 formation would interfere with usage of the  $X_L$  5'SS. Q4 is a control, a potential quadruplex that does not appear to form. Q2.1, Q4.1 and Q5.1 are mutations that would destabilize secondary structures without affecting the quadruplex, and their effects are judged relative to the WT sequence; Q2.2, 4.2 and 5.2 are second-site mutations that restore base-pairing but would disrupt the G4, and their effects are predicted in comparison to the initial mutations. The effects of GQC-05 in all cases are predicted relative to the same sequence in the absence of GQC-05. (B) Outcomes of splicing assays *in vitro* (Figure 6). In the absence of GQC-05, the *t*-tests examine the null hypotheses that the mutants Q2.1, Q4.1 and Q5.1 splice like the non-mutant Bcl-X-681 and that mutants Q2.2, Q4.2 and Q5.2 splice like Q2.1, Q4.1 and Q5.1, respectively. In the presence of GQC-05, the null hypothesis is that GQC-05 has no effect on splicing.



## SUPPLEMENTARY DATA

Effects of GQC-05 at 3 concentrations (1, 5, and 10  $\mu$ M) on Bcl-X footprinting. This Table is deposited as a separate file because of its size. It contains an analysis of the data contained in gels displayed in Supplementary Figure 4 of Weldon *et al.*, Nat. Chem. Biol. 13, 18-21 (2017), which contained previously unanalysed lanes in which GQC-05 had been added to normal and deazaguanine-containing RNA prior to footprinting using T1, T2 and V1 nucleases.

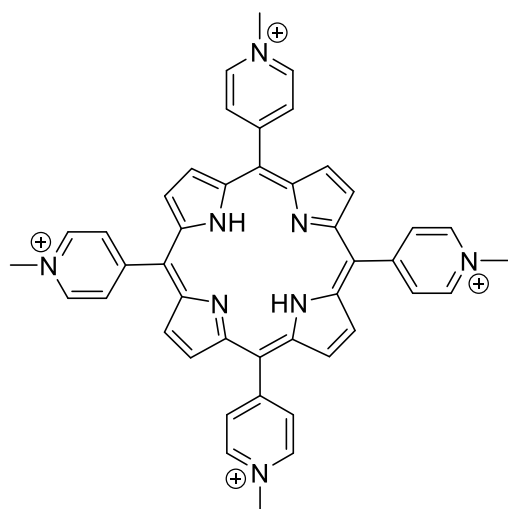

TMPyP4

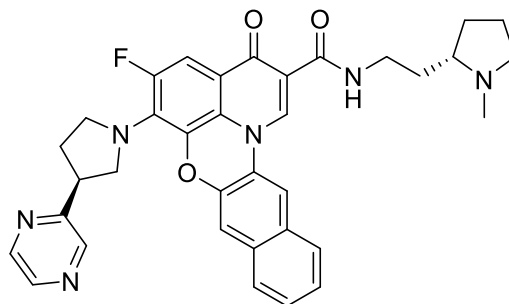

Quarfloxin

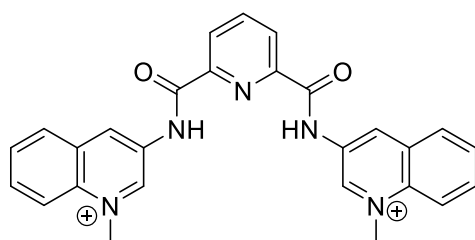

TfO<sup>⊖</sup>

OTf<sup>⊖</sup>

360A

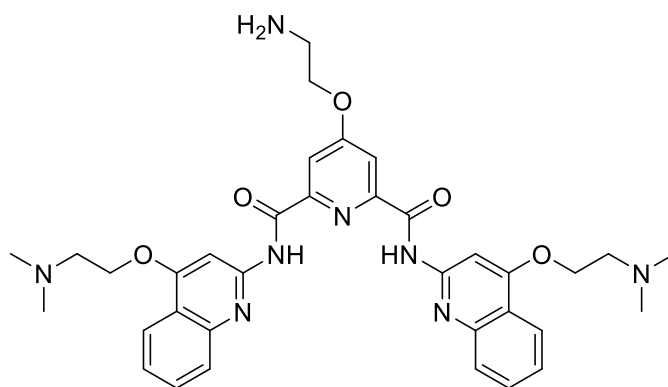

Pyridostatin (PDS)

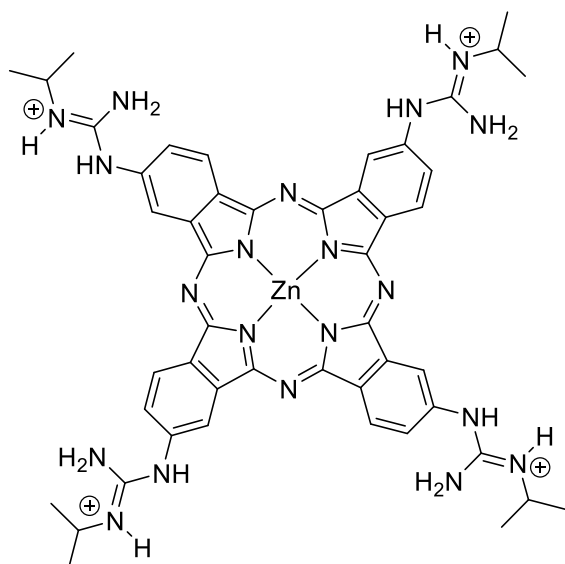

Zn-DIGP

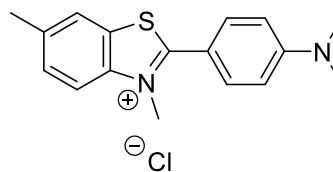

Thioflavin T

## Ellipticine Series

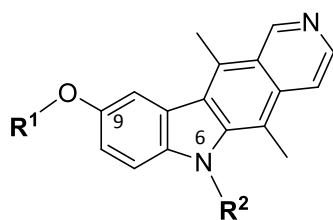

|          | R <sup>1</sup> | R <sup>2</sup> |
|----------|----------------|----------------|
| GQC-05   |                | H              |
| GSA-1112 |                |                |
| GSA-1113 | Me             |                |
| GSA-1125 |                | H              |
| GSA-1126 |                | H              |
| GSA-1133 |                | H              |
| GSA-1135 |                | H              |

Quindoline Series

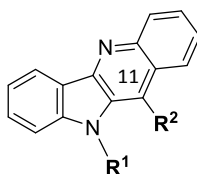

|            | <b>R<sup>1</sup></b> | <b>R<sup>2</sup></b> |
|------------|----------------------|----------------------|
| Quindoline | H                    | H                    |
| SYUIQ-5    | H                    |                      |
| GSA-0819   |                      |                      |
| GSA-0820   | H                    |                      |
| GSA-0902   |                      |                      |
| GSA-0924   | H                    |                      |
| GSA-0933   | H                    |                      |
| GSA-1013   | H                    |                      |
| GSA-1015   | H                    |                      |

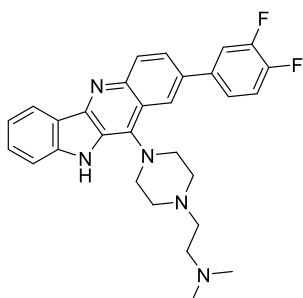

GSA-0925

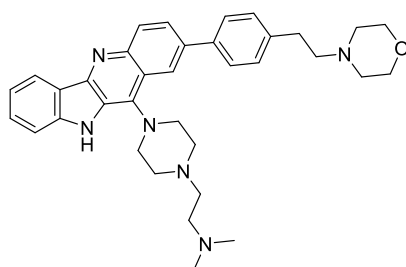

GSA-0927

DMSO

GQC-05

mins    0    1    2.5    5    30    60

0    1    2.5    5    30    60

B/C  
A  
H

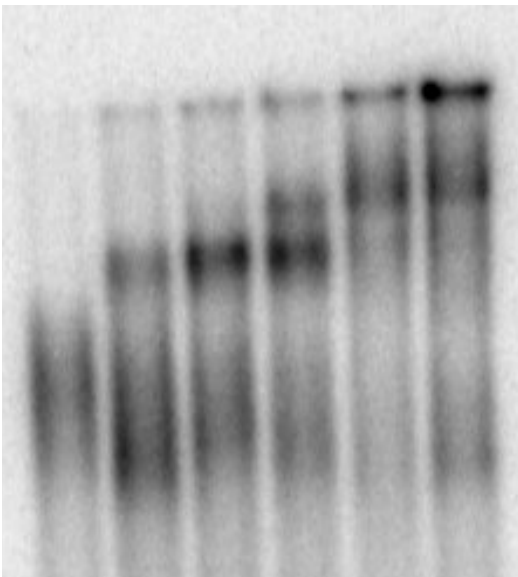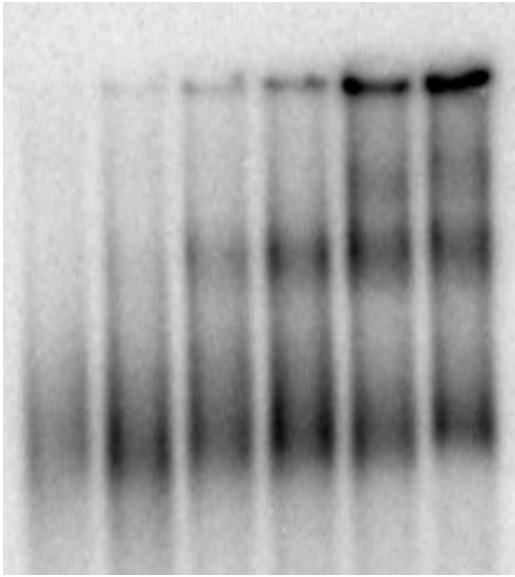

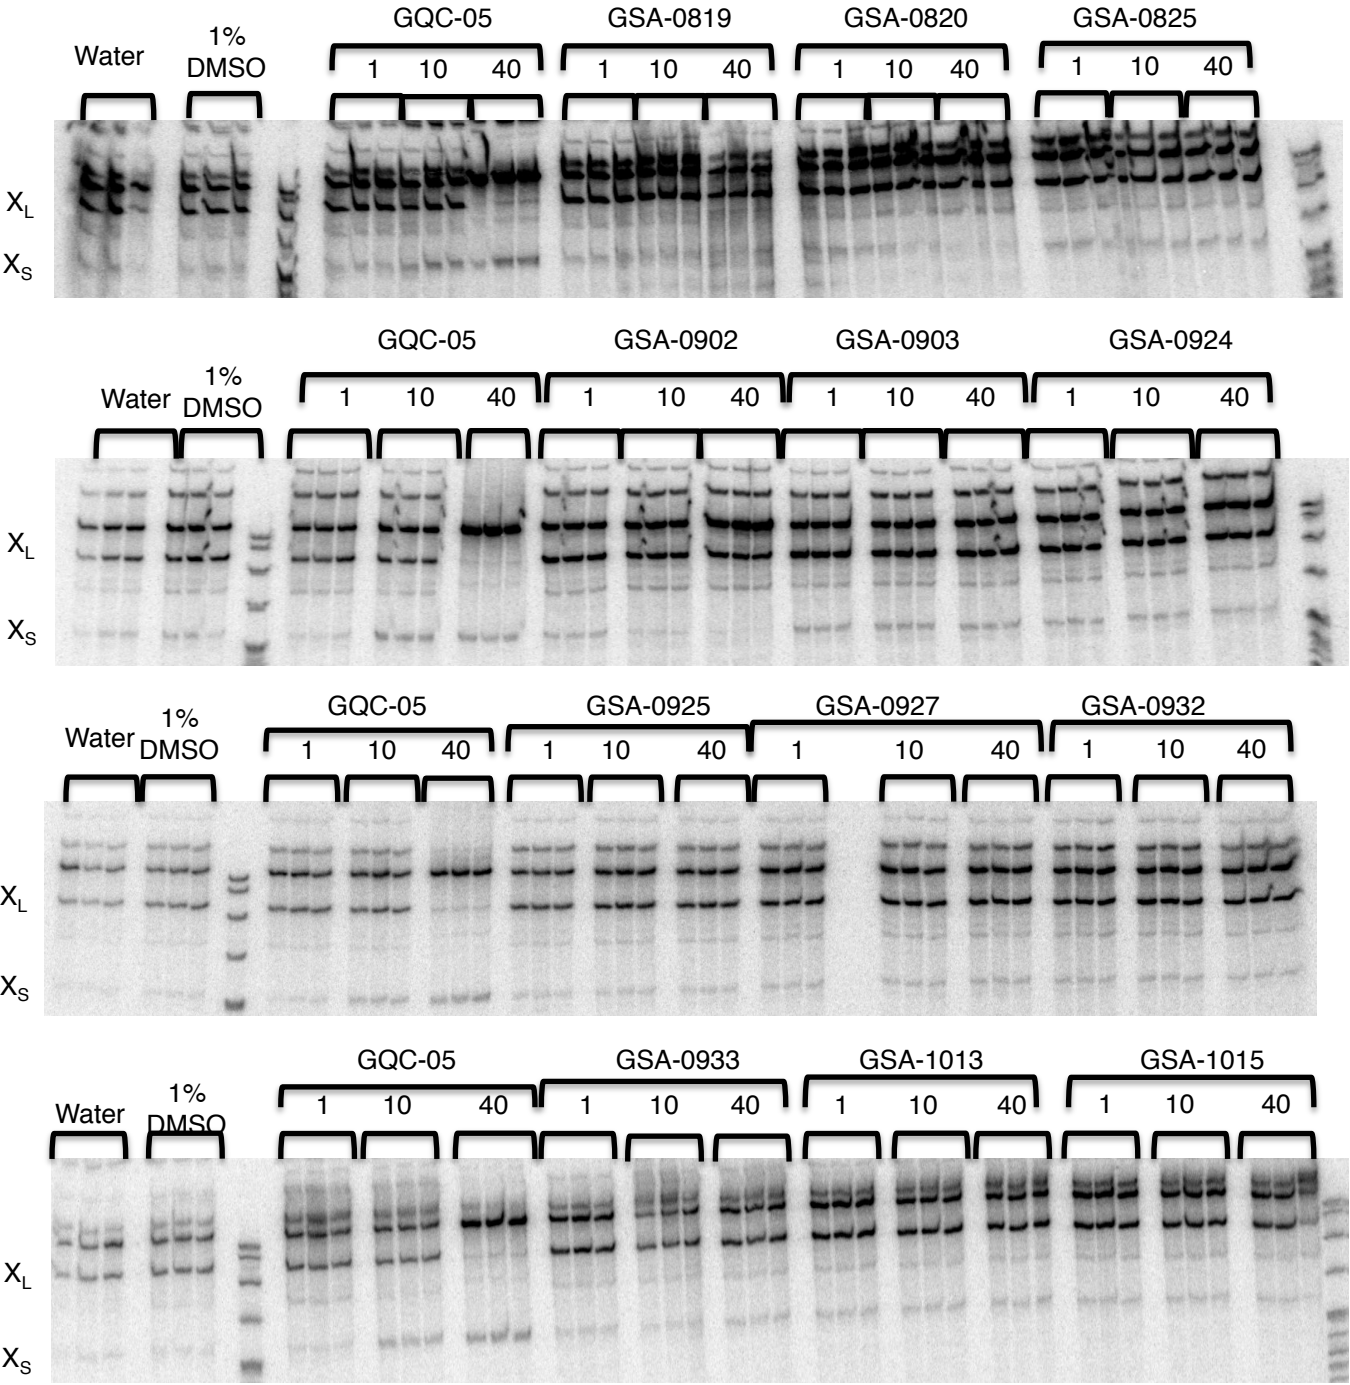

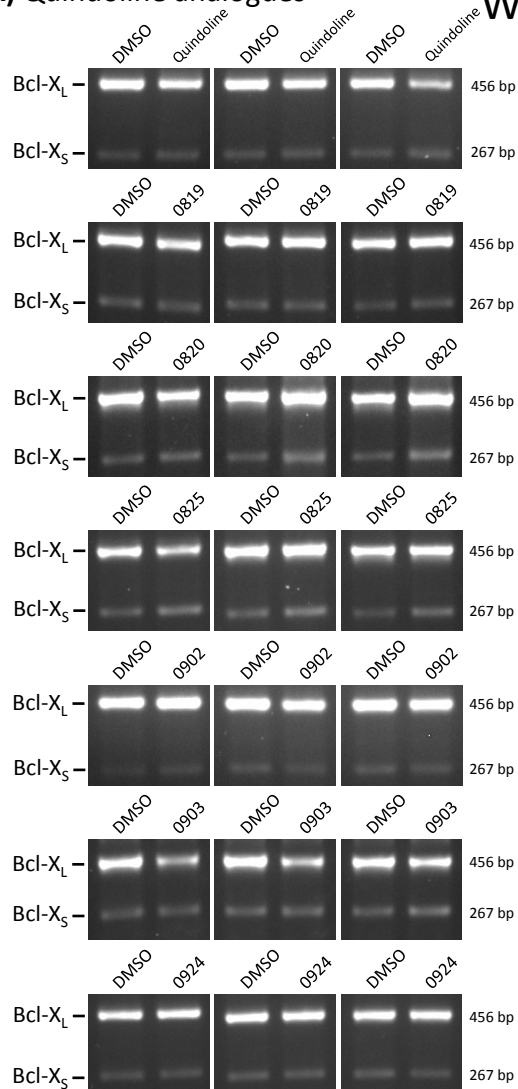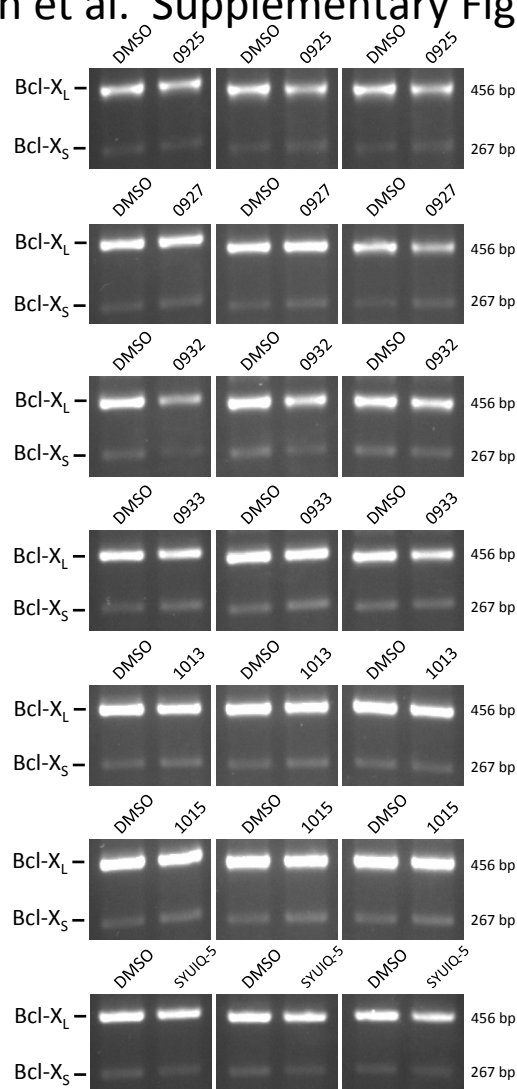

**(B) Fluoroquinolone**

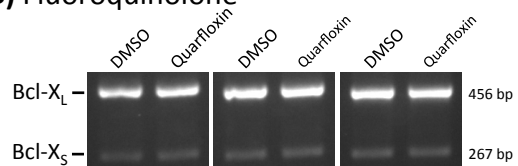

**(C) Benzothiazole**

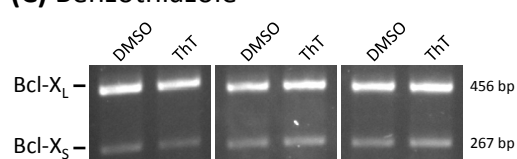

**(D) Phthalocyanine**

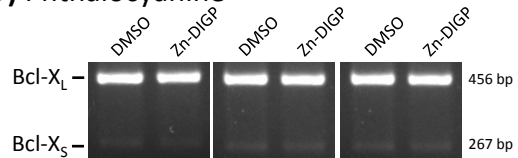

**(E) Porphyrin**

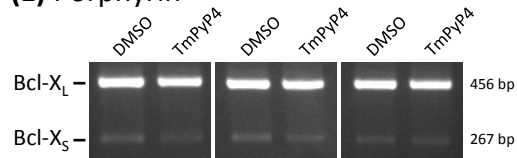

**(F) Quinoliny**

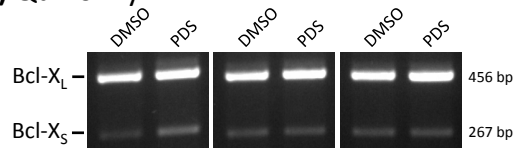

**(G) Bisquinolium derivatives**

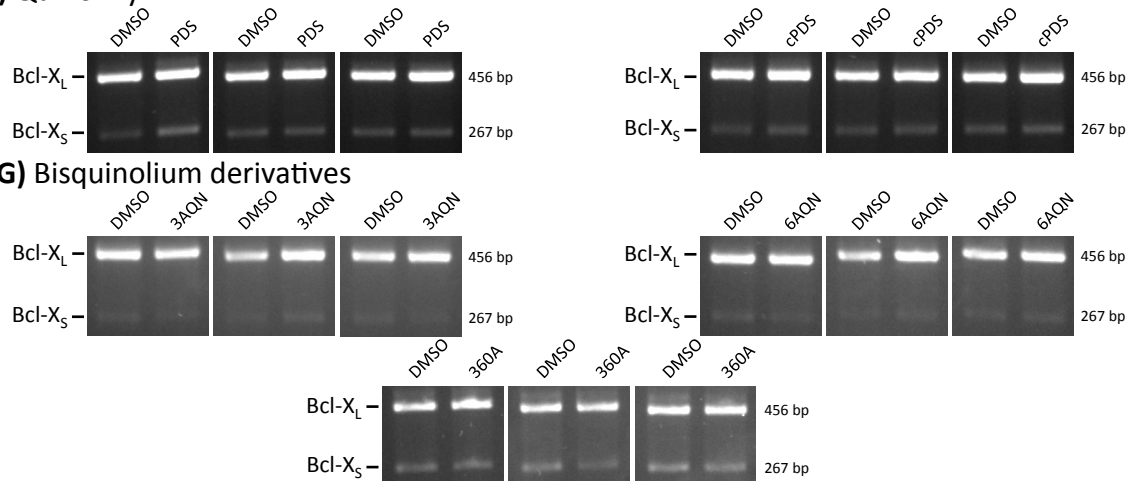

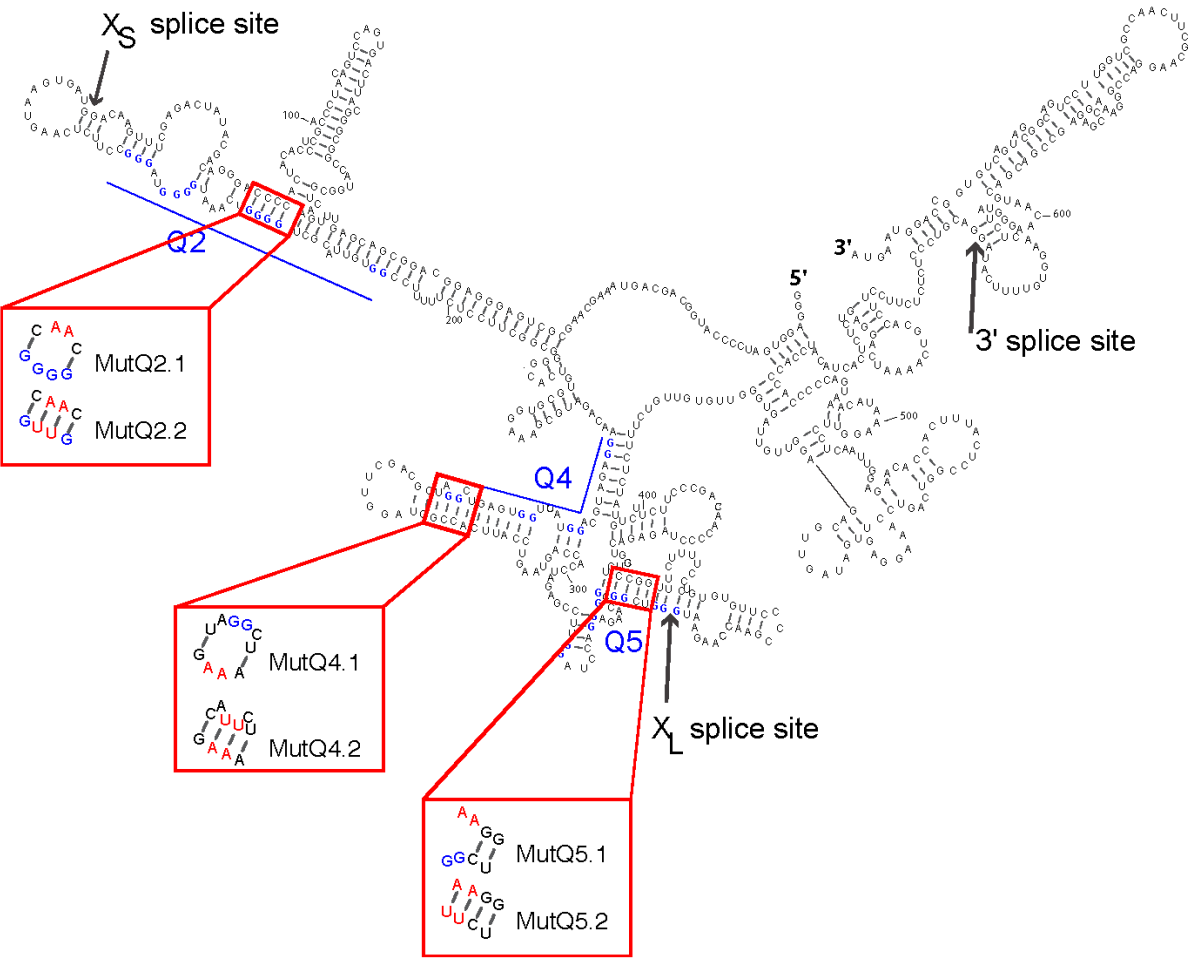



A

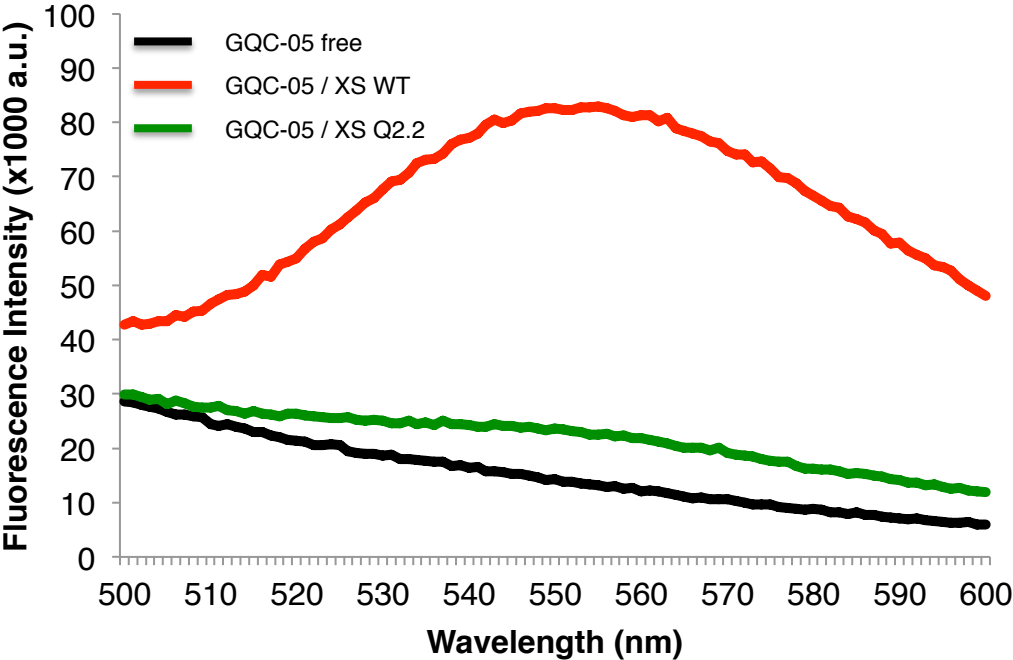

B

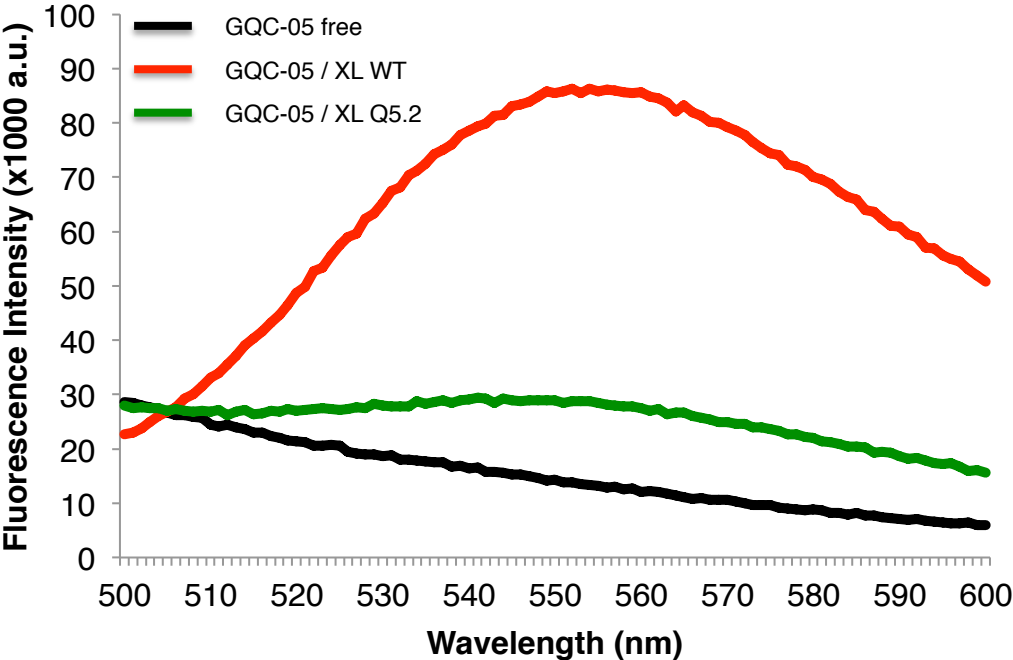

## LEGENDS FOR SUPPLEMENTARY FIGURES

**Supplementary Figure S1.** Diagrammatic structures of six classes of G4-ligand.

**Supplementary Figure S2.** Diagrams showing the structures of GQC-05 and other ellipticines tested.

**Supplementary Figure S3.** Diagrams showing the structures of quindolines tested.

**Supplementary Figure S4.** Time courses of splicing complex assembly. Splicing reactions were incubated for the times shown, treated with heparin, then analysed by electrophoresis on native agarose gels. The reactions contained GQC-05 or an appropriate concentration of DMSO, the solvent for GQC-05.

**Supplementary Figure S5.** *In vitro* splicing of Bcl-X-681 in the presence of quindolines. Splicing assays were done in triplicate with the designated ligands at the concentrations shown ( $\mu\text{M}$ ). The ligands were dissolved in 10% DMSO, and controls included samples done in the presence of DMSO at the same final concentration of 1%.

**Supplementary Figure S6.** Effects of G4 ligands on splicing of endogenous Bcl-X transcripts in HeLa cells. Three wells of cells were incubated in each case with the compound, dissolved in DMSO, at 10  $\mu\text{M}$  for 4 h, together with three wells that were treated with the DMSO only. Incubation was followed by isolation of the RNA and amplification by reverse transcriptase-PCR. The products were separated by agarose gel electrophoresis and detected by ethidium bromide. Reactions done in parallel with reaction mixtures lacking reverse transcriptase were blank and have been omitted.

**Supplementary Figure S7.** Secondary structure of Bcl-X-681 pre-mRNA, showing the mutations introduced in the Q2, Q4 and Q5 regions.

**Supplementary Figure S8.** Fluorescence emission spectra of GQC-05 in the presence of domains of Bcl-X-681 carrying mutations intended to disrupt the potential to form G4s. RNA was incubated at 1  $\mu\text{M}$  with GQC-05 at 20  $\mu\text{M}$ . Excitation was at 321 nm. (A) Spectra of the X<sub>S</sub> domain, wild-type (red) and mutant Q2.2 (green). Free GQC-05 is black. (B) Spectra of the X<sub>L</sub> domain, wild-type (red)

and mutant Q5.2 (green). Free GQC-05 is black.
