# Supplementary material for: Specific G-quadruplex ligands modulate the alternative splicing of Bcl-X
Source: Oxford University Press journal article supplement (doi:10.1093/nar/gkx1122), 2017-10-26
Supplement: gkx1122_supp.zip [file gkx1122_supp.zip]

**Supplementary Data:** Effect of GQC-05 at 3 concentrations (1, 5, and 10  $\mu$ M) on Bcl-x footprinting

Analysis of the data contained in gels displayed in Supplementary Figure 4 of Weldon et al. (2017), Nat. Chem. Biol. 13, 18-20.

Index is calculated as  $(V1(10\mu\text{M GQC-05}) / V1(\text{no GQC-05})) / (T2(10\mu\text{M GQC-05}) / T2(\text{no GQC-05}))$

Index values above and below the mean  $\log(\text{Index}) \pm 2\text{SD}$  are highlighted in Figure 5B

|           |   |             |      |      |      |       |       |       |       |       |       |       |       |       |       |       |       | Index | Log(Index) |
|-----------|---|-------------|------|------|------|-------|-------|-------|-------|-------|-------|-------|-------|-------|-------|-------|-------|-------|------------|
|           |   | Tris buffer |      |      |      | T1    |       |       |       | T2    |       |       |       | V1    |       |       |       |       |            |
| GQC-05 c° |   | -           | 1    | 5    | 10   | -     | 1     | 5     | 10    | -     | 1     | 5     | 10    | -     | 1     | 5     | 10    |       |            |
| 1         | G | 1.00        | 1.07 | 1.10 | 1.17 | 0.39  | 0.35  | 0.47  | 0.25  | 0.19  | 0.66  | 0.49  | 0.44  | 0.56  | 0.27  | 0.71  | 0.77  | 0.61  | -0.21      |
| 2         | G |             |      |      |      |       |       |       |       |       |       |       |       |       |       |       |       | -     | -          |
| 3         | G | 1.00        | 0.59 | 1.06 | 2.11 | 1.03  | 1.66  | 1.01  | 0.97  | 0.25  | 0.99  | 1.02  | 0.85  | -0.30 | 0.75  | -0.05 | -0.31 | 0.31  | -0.52      |
| 4         | A |             |      |      |      |       |       |       |       |       |       |       |       |       |       |       |       | -     | -          |
| 5         | G |             |      |      |      |       |       |       |       |       |       |       |       |       |       |       |       | -     | -          |
| 6         | G | 1.00        | 0.00 | 0.89 | 0.52 | 0.77  | 2.65  | 2.19  | 1.91  | 1.27  | 1.76  | 1.24  | 0.41  | 0.70  | 1.75  | 0.82  | 0.23  | 1.01  | 0.00       |
| 7         | T | 1.00        | 1.12 | 0.39 | 0.71 | 2.26  | 1.78  | 2.20  | 1.47  | 0.90  | 1.11  | 0.71  | 0.69  | 0.53  | 0.68  | 0.74  | 0.62  | 1.53  | 0.19       |
| 8         | G | 1.00        | 0.79 | 0.96 | 0.60 | 0.43  | 2.16  | 2.80  | 1.75  | 1.31  | 2.76  | 1.85  | 1.72  | 0.83  | 0.32  | 0.92  | 0.91  | 0.84  | -0.08      |
| 9         | A | 1.00        | 0.50 | 0.67 | 0.71 | 5.69  | 5.35  | 2.74  | 2.13  | 0.88  | 0.76  | 1.41  | 0.55  | 0.49  | 0.40  | 0.39  | 0.49  | 1.61  | 0.21       |
| 10        | T | 1.00        | 0.69 | 0.58 | 0.46 | 0.00  | 0.18  | 0.58  | 1.24  | 0.97  | 1.39  | 0.70  | 0.65  | 0.50  | 0.25  | 0.35  | 0.46  | 1.36  | 0.14       |
| 11        | C | 1.00        | 0.74 | 0.69 | 0.49 | 0.25  | 0.60  | 0.58  | 0.53  | 0.32  | 0.58  | 0.85  | 0.71  | 0.42  | 0.51  | 0.56  | 0.63  | 0.68  | -0.17      |
| 12        | C | 1.00        | 0.44 | 1.11 | 0.71 | 0.35  | 1.12  | 1.01  | 0.89  | 0.30  | 0.89  | 0.49  | 0.36  | 0.93  | 0.74  | 0.87  | 0.93  | 0.82  | -0.09      |
| 13        | C | 1.00        | 1.28 | 1.12 | 1.75 | 1.10  | 0.47  | 0.90  | 0.38  | 0.20  | 0.28  | 0.19  | 0.19  | 0.80  | 0.33  | 0.55  | 0.27  | 0.34  | -0.46      |
| 14        | C | 1.00        | 1.18 | 0.85 | 1.25 | 0.44  | 0.61  | 0.31  | 0.53  | 1.18  | 1.19  | 1.20  | 1.05  | 0.49  | 0.27  | 0.87  | 1.08  | 2.49  | 0.40       |
| 15        | A | 1.00        | 0.00 | 1.01 | 0.69 | 0.60  | 0.65  | 0.51  | 0.88  | 0.20  | 0.27  | 3.30  | 1.03  | 0.66  | 0.96  | 1.28  | 1.07  | 0.31  | -0.50      |
| 16        | T | 1.00        | 0.91 | 0.94 | 0.55 | 0.79  | 1.09  | 0.95  | 0.77  | 0.51  | 1.18  | 1.26  | 1.15  | 0.37  | 1.07  | 0.87  | 0.46  | 0.55  | -0.26      |
| 17        | G | 1.00        | 0.08 | 1.35 | 0.78 | 1.52  | 2.29  | 2.36  | 1.80  | 1.31  | 2.16  | 1.09  | 2.32  | 0.60  | 1.28  | 1.26  | 1.50  | 1.42  | 0.15       |
| 18        | G | 1.00        | 1.06 | 0.91 | 0.73 | 1.19  | 1.16  | 1.28  | 0.61  | 0.71  | 1.04  | 1.16  | 1.32  | 0.70  | 0.84  | 0.63  | 0.75  | 0.58  | -0.24      |
| 19        | C | 1.00        | 0.47 | 0.99 | 1.25 | 2.31  | 2.17  | 1.43  | 1.21  | 0.48  | 0.86  | 0.78  | 0.70  | 0.62  | 0.24  | 0.69  | 0.64  | 0.71  | -0.15      |
| 20        | A | 1.00        | 0.87 | 1.11 | 1.27 | 0.59  | 0.43  | 0.40  | 0.40  | 1.79  | 0.82  | 0.83  | 0.90  | 0.60  | 0.39  | 0.75  | 0.77  | 2.54  | 0.40       |
| 21        | G | 1.00        | 2.83 | 1.11 | 0.36 | 1.08  | 1.81  | 2.13  | 1.22  | 1.74  | 3.22  | 2.89  | 3.00  | 1.73  | 1.65  | 2.39  | 1.92  | 0.65  | -0.19      |
| 22        | C | 1.00        | 1.2  | 1.2  | 1.4  | 2.06  | 1.85  | 1.31  | 1.10  | 1.26  | 1.54  | 1.78  | 0.94  | 0.9   | 1.0   | 0.6   | 0.6   | 0.84  | -0.08      |
| 23        | A | 1.00        | 1.52 | 1.09 | 0.90 | 0.50  | 0.68  | 0.57  | 0.54  | 1.83  | 1.14  | 1.04  | 1.09  | 1.29  | 0.76  | 1.31  | 1.20  | 1.56  | 0.19       |
| 24        | G | 1.00        | 0.18 | 1.05 | 0.89 | 3.45  | 2.21  | 3.44  | 1.72  | 2.80  | 3.85  | 3.48  | 2.83  | 2.25  | 1.65  | 2.58  | 2.49  | 1.10  | 0.04       |
| 25        | T | 1.00        | 0.86 | 0.99 | 0.97 | 2.19  | 2.54  | 1.52  | 1.46  | 0.59  | 1.05  | 0.99  | 0.82  | 0.29  | 0.45  | 0.57  | 0.35  | 0.85  | -0.07      |
| 26        | A | 1.00        | 1.68 | 1.26 | 1.17 | 1.03  | 0.62  | 0.87  | 0.97  | 2.89  | 1.68  | 1.16  | 1.29  | 1.21  | 0.73  | 1.08  | 1.59  | 2.92  | 0.47       |
| 27        | A | 1.00        | 0.63 | 1.21 | 0.87 | 0.96  | 1.16  | 1.15  | 1.14  | 5.99  | 8.39  | 9.38  | 8.98  | 1.49  | 1.46  | 1.31  | 1.41  | 0.63  | -0.20      |
| 28        | A | 1.00        | 0.20 | 0.54 | 0.55 | 0.49  | 1.24  | 1.11  | 1.22  | 3.59  | 4.60  | 4.40  | 3.85  | 0.96  | 0.85  | 0.54  | 0.59  | 0.58  | -0.24      |
| 29        | G | 1.00        | 1.18 | 1.21 | 1.03 | 6.92  | 2.88  | 5.50  | 2.51  | 6.57  | 12.60 | 8.16  | 9.27  | 0.97  | 0.94  | 1.55  | 1.33  | 0.97  | -0.01      |
| 30        | C | 1.00        | 1.55 | 1.10 | 1.42 | 1.28  | 1.49  | 1.01  | 0.87  | 0.78  | 0.34  | 1.16  | 0.21  | 0.32  | 0.34  | 0.29  | 0.20  | 2.19  | 0.34       |
| 31        | A | 1.00        | 1.60 | 1.03 | 0.83 | 1.06  | 0.52  | 0.63  | 0.70  | 3.35  | 1.21  | 1.42  | 1.11  | 1.08  | 0.52  | 1.35  | 1.40  | 3.93  | 0.59       |
| 32        | A | 1.00        | 0.59 | 0.82 | 0.93 | 0.30  | 0.52  | 0.40  | 0.58  | 1.28  | 1.69  | 1.69  | 2.38  | 0.98  | 0.56  | 1.31  | 1.09  | 0.60  | -0.22      |
| 33        | G | 1.00        | 0.12 | 0.60 | 0.16 | 3.86  | 2.47  | 3.80  | 2.55  | 2.69  | 3.80  | 5.16  | 6.78  | 0.44  | 0.89  | 0.16  | 0.35  | 0.32  | -0.50      |
| 34        | C | 1.00        | 0.51 | 0.68 | 0.78 | 3.02  | 2.65  | 2.35  | 1.97  | 0.42  | 0.65  | 0.65  | 0.66  | 0.71  | 0.75  | 0.66  | 0.72  | 0.63  | -0.20      |
| 35        | G | 1.00        | 0.70 | 0.72 | 0.91 | 0.50  | 0.67  | 0.45  | 0.61  | 0.48  | 0.58  | 0.63  | 0.37  | 0.45  | 0.35  | 0.54  | 0.61  | 1.81  | 0.26       |
| 36        | C | 1.00        | 0.73 | 0.79 | 0.72 | 0.97  | 0.99  | 0.71  | 0.81  | 0.43  | 0.62  | 0.39  | 0.36  | 1.18  | 1.05  | 1.08  | 1.00  | 1.03  | 0.01       |
| 37        | T | 1.00        | 0.61 | 1.05 | 1.00 | 0.42  | 0.54  | 0.79  | 0.66  | 0.42  | 0.71  | 0.56  | 0.67  | 0.66  | 0.81  | 0.74  | 0.72  | 0.69  | -0.16      |
| 38        | G | 1.00        | 0.97 | 0.79 | 1.04 | 0.69  | 0.57  | 0.47  | 0.59  | 0.61  | 0.63  | 0.64  | 0.54  | 0.69  | 0.61  | 0.84  | 1.06  | 1.75  | 0.24       |
| 39        | A | 1.00        | 0.81 | 0.88 | 0.85 | 0.71  | 1.02  | 0.98  | 0.93  | 0.52  | 0.54  | 0.31  | 0.35  | 0.78  | 0.45  | 0.73  | 0.66  | 1.25  | 0.10       |
| 40        | G | 1.00        | 0.69 | 0.81 | 0.65 | 0.34  | 0.63  | 0.63  | 0.58  | 1.00  | 1.19  | 1.37  | 1.29  | 0.44  | 0.53  | 0.60  | 0.53  | 0.93  | -0.03      |
| 41        | G | 1.00        | 0.64 | 0.94 | 1.30 | 0.87  | 1.11  | 1.16  | 1.07  | 0.83  | 1.02  | 0.94  | 0.68  | 0.91  | 1.05  | 0.77  | 1.04  | 1.41  | 0.15       |
| 42        | G | 1.00        | 0.82 | 0.98 | 0.95 | 0.73  | 0.69  | 1.04  | 0.61  | 0.59  | 0.69  | 0.50  | 0.66  | 0.39  | 0.37  | 0.52  | 0.58  | 1.31  | 0.12       |
| 43        | A | 1.00        | 1.20 | 1.04 | 1.29 | 0.59  | 0.60  | 0.43  | 0.43  | 0.36  | 0.49  | 0.46  | 0.41  | 0.40  | 0.18  | 0.54  | 0.60  | 1.30  | 0.12       |
| 44        | G | 1.00        | 0.78 | 1.27 | 1.68 | 0.78  | 0.75  | 1.24  | 0.65  | 1.06  | 1.11  | 0.99  | 0.93  | 0.74  | 0.72  | 0.92  | 1.00  | 1.53  | 0.19       |
| 45        | G | 1.00        | 1.14 | 1.05 | 1.19 | 0.67  | 0.61  | 0.90  | 0.63  | 0.47  | 0.70  | 0.62  | 0.56  | 0.42  | 0.32  | 0.63  | 0.61  | 1.23  | 0.09       |
| 46        | C | 1.00        | 0.89 | 1.40 | 0.98 | 2.22  | 2.49  | 1.93  | 1.81  | 1.33  | 1.56  | 1.14  | 1.26  | 0.62  | 0.59  | 0.99  | 0.94  | 1.61  | 0.21       |
| 47        | A | 1.00        | 1.31 | 0.97 | 1.13 | 0.62  | 0.43  | 0.29  | 0.39  | 1.55  | 0.67  | 0.66  | 0.76  | 0.63  | 0.33  | 0.68  | 0.73  | 2.37  | 0.38       |
| 48        | G | 1.00        | 0.45 | 0.74 | 0.79 | 0.46  | 0.74  | 0.88  | 0.93  | 0.75  | 1.76  | 1.56  | 1.59  | 2.34  | 2.26  | 2.32  | 2.09  | 0.42  | -0.38      |
| 49        | G | 1.00        | 1.12 | 1.44 | 0.87 | 1.44  | 1.31  | 1.27  | 1.58  | 0.77  | 1.17  | 0.65  | 0.65  | 2.32  | 2.44  | 2.78  | 2.57  | 1.29  | 0.11       |
| 50        | C | 1.0         | 0.8  | 0.9  | 1.0  | 0.82  | 0.95  | 0.77  | 0.87  | 0.55  | 0.77  | 0.85  | 0.84  | 0.92  | 0.80  | 1.06  | 1.21  | 0.86  | -0.07      |
| 51        | G | 1.00        | 1.08 | 1.20 | 1.47 | 0.47  | 0.28  | 0.41  | 0.38  | 0.55  | 0.54  | 0.52  | 0.52  | 1.01  | 0.79  | 1.24  | 1.13  | 1.18  | 0.07       |
| 52        | A | 1.00        | 0.32 | 0.64 | 0.62 | 2.14  | 2.53  | 1.77  | 1.50  | 0.78  | 1.28  | 0.76  | 1.15  | 2.02  | 2.06  | 2.86  | 3.13  | 1.05  | 0.02       |
| 53        | C | 1.00        | 1.52 | 0.97 | 0.96 | 0.91  | 1.28  | 0.93  | 1.28  | 1.31  | 1.30  | 1.45  | 1.72  | 1.85  | 1.68  | 1.68  | 1.44  | 0.59  | -0.23      |
| 54        | G | 1.00        | 1.21 | 1.06 | 1.34 | 1.18  | 1.29  | 2.14  | 1.66  | 1.24  | 1.09  | 0.82  | 1.08  | 1.82  | 1.62  | 2.39  | 2.02  | 1.27  | 0.10       |
| 55        | A | 1.00        | 0.96 | 1.00 | 0.96 | 0.80  | 1.17  | 0.36  | 0.63  | 0.60  | 0.91  | 0.65  | 0.77  | 1.09  | 0.87  | 1.06  | 1.00  | 0.71  | -0.15      |
| 56        | G | 1.00        | 0.84 | 1.02 | 1.12 | 1.52  | 0.83  | 2.07  | 1.35  | 3.11  | 3.12  | 2.86  | 3.29  | 0.79  | 0.72  | 0.78  | 0.81  | 0.97  | -0.01      |
| 57        | T | 1.00        | 1.24 | 1.08 | 1.24 | 2.92  | 3.96  | 2.08  | 2.06  | 0.82  | 0.99  | 0.70  | 0.94  | 0.75  | 0.71  | 0.85  | 0.84  | 0.99  | -0.01      |
| 58        | T | 1.00        | 0.93 | 1.01 | 1.03 | 1.15  | 1.74  | 1.63  | 1.85  | 2.49  | 2.92  | 2.25  | 2.65  | 1.25  | 1.18  | 1.23  | 1.26  | 0.95  | -0.02      |
| 59        | T | 1.00        | 2.68 | 2.22 | 2.96 | 2.77  | 4.52  | 5.45  | 4.32  | 5.64  | 6.28  | 4.62  | 5.71  | 5.47  | 6.06  | 7.64  | 5.85  | 1.06  | 0.02       |
| 60        | G | 1.00        | 0.84 | 0.93 | 0.72 | 0.41  | 0.54  | 0.78  | 0.65  | 1.16  | 1.28  | 0.95  | 1.08  | 0.68  | 0.46  | 0.53  | 0.66  | 1.05  | 0.02       |
| 61        | A | 1.00        | 2.20 | 2.39 | 5.32 | 67.29 | 71.24 | 48.40 | 58.51 | 15.44 | 18.57 | 16.92 | 25.12 | 10.78 | 10.73 | 10.10 | 9.43  | 0.54  | -0.27      |
| 62        | A | 1.00        | 0.60 | 0.97 | 1.00 | 0.46  | 0.43  | 0.59  | 1.07  | 1.52  | 1.72  | 1.59  | 1.93  | 0.69  | 0.68  | 0.77  | 0.79  | 0.91  | -0.04      |
| 63        | C | 1.00        | 1.16 | 1.47 | 1.09 | 1.37  | 2.04  | 1.06  | 2.11  | 2.63  | 2.99  | 2.28  | 2.78  | 3.09  | 2.48  | 3.16  | 1.82  | 0.56  | -0.25      |
| 64        | T | 1.00        | 0.82 | 0.76 | 0.62 | 0.27  | 0.55  | 0.44  | 0.35  | 0.33  | 0.32  | 0.27  | 0.32  | 0.49  | 0.50  | 0.60  | 0.78  | 1.65  | 0.22       |
| 65        | G | 1.00        | 0.73 | 1.40 | 1.12 | 3.87  | 3.67  | 3.87  | 3.22  | 2.30  | 2.94  | 2.24  | 2.67  | 2.91  | 2.59  | 3.48  | 3.48  | 1.03  | 0.01       |

|     |   |      |      |        |      |      |       |      |      |      |      |      |      |       |       |       |       |      |       |
|-----|---|------|------|--------|------|------|-------|------|------|------|------|------|------|-------|-------|-------|-------|------|-------|
| 66  | C | 1.00 | 1.80 | 2.74   | 2.76 | 1.64 | 1.79  | 3.34 | 2.21 | 0.82 | 0.76 | 0.59 | 0.89 | 1.68  | 1.24  | 2.26  | 2.12  | 1.16 | 0.06  |
| 67  | G | 1.00 | 0.87 | 0.92   | 0.64 | 0.73 | 0.76  | 0.63 | 0.57 | 0.93 | 0.97 | 0.90 | 0.92 | 0.56  | 0.30  | 0.51  | 0.65  | 1.18 | 0.07  |
| 68  | G | 1.00 | 1.17 | 1.21   | 1.29 | 1.96 | 2.33  | 2.88 | 2.21 | 1.48 | 1.68 | 1.50 | 1.73 | 1.01  | 0.94  | 1.19  | 1.14  | 0.96 | -0.02 |
| 69  | T | 1.00 | 1.24 | 1.00   | 1.05 | 6.06 | 5.06  | 3.50 | 3.93 | 1.60 | 1.65 | 1.38 | 1.71 | 1.04  | 0.93  | 0.84  | 0.98  | 0.89 | -0.05 |
| 70  | A | 1.00 | 1.22 | 1.46   | 1.15 | 0.61 | 0.62  | 0.50 | 0.80 | 1.90 | 1.41 | 1.26 | 1.41 | 0.67  | 0.55  | 0.66  | 0.82  | 1.65 | 0.22  |
| 71  | C | 1.00 | 1.08 | 0.91   | 0.93 | 0.49 | 0.50  | 1.05 | 0.93 | 4.41 | 4.42 | 4.32 | 4.21 | 1.07  | 0.98  | 0.81  | 1.05  | 1.03 | 0.01  |
| 72  | C | 1.00 | 1.16 | 0.97   | 0.86 | 0.58 | 0.57  | 0.89 | 0.92 | 1.14 | 0.77 | 0.76 | 0.87 | 0.90  | 0.84  | 0.76  | 0.97  | 1.40 | 0.15  |
| 73  | G | 1.00 | 0.72 | 0.95   | 1.06 | 0.64 | 0.44  | 0.33 | 0.41 | 0.66 | 0.64 | 0.64 | 0.61 | 0.55  | 0.48  | 0.62  | 0.72  | 1.39 | 0.14  |
| 74  | G | 1.00 | 1.38 | 1.32   | 1.19 | 1.41 | 1.92  | 3.93 | 4.02 | 1.26 | 1.21 | 1.21 | 1.27 | 1.26  | 1.45  | 1.19  | 1.38  | 1.08 | 0.03  |
| 75  | C | 1.00 | 0.72 | 0.75   | 0.92 | 0.62 | 0.54  | 0.32 | 0.55 | 0.29 | 0.29 | 0.34 | 0.33 | 0.34  | 0.31  | 0.39  | 0.40  | 1.03 | 0.01  |
| 76  | G | 1.00 | 0.89 | 1.06   | 0.92 | 0.61 | 0.75  | 0.72 | 0.79 | 0.82 | 0.84 | 0.88 | 0.97 | 1.15  | 1.24  | 1.08  | 1.06  | 0.77 | -0.11 |
| 77  | G | 1.00 | 0.96 | 0.72   | 0.79 | 1.13 | 0.97  | 0.77 | 0.94 | 1.06 | 0.96 | 1.13 | 1.21 | 1.93  | 2.19  | 1.67  | 1.53  | 0.70 | -0.16 |
| 78  | G | 1.00 | 0.78 | 0.92   | 0.75 | 1.04 | 1.41  | 1.85 | 1.09 | 1.01 | 0.95 | 1.00 | 1.05 | 0.46  | 0.58  | 0.55  | 0.59  | 1.23 | 0.09  |
| 79  | C | 1.00 | 1.27 | 0.82   | 1.05 | 0.99 | 1.19  | 1.05 | 0.82 | 1.12 | 1.19 | 1.38 | 1.38 | 0.71  | 0.56  | 0.91  | 0.80  | 0.91 | -0.04 |
| 80  | A | 1.00 | 1.25 | 0.98   | 0.98 | 0.80 | 1.04  | 0.86 | 0.81 | 1.02 | 0.67 | 0.72 | 0.77 | 0.52  | 0.41  | 0.71  | 0.65  | 1.67 | 0.22  |
| 81  | T | 1.00 | 0.95 | 0.94   | 0.89 | 0.60 | 0.35  | 0.31 | 0.72 | 1.25 | 1.10 | 1.27 | 1.25 | 1.61  | 1.91  | 1.76  | 1.30  | 0.80 | -0.10 |
| 82  | T | 1.00 | 0.84 | 0.99   | 0.89 | 0.60 | 0.65  | 0.58 | 0.86 | 0.96 | 0.91 | 1.18 | 1.34 | 1.22  | 1.40  | 1.17  | 1.08  | 0.63 | -0.20 |
| 83  | C | 1.00 | 1.36 | 1.45   | 1.29 | 0.62 | 0.65  | 0.68 | 1.02 | 1.59 | 1.44 | 1.78 | 1.73 | 6.21  | 7.53  | 4.82  | 4.29  | 0.64 | -0.20 |
| 84  | A | 1.00 | 1.14 | 1.10   | 0.73 | 0.56 | 0.34  | 0.62 | 0.59 | 1.09 | 0.35 | 0.38 | 0.49 | 0.59  | 0.47  | 0.47  | 0.56  | 2.09 | 0.32  |
| 85  | G |      |      |        |      |      |       |      |      |      |      |      |      |       |       |       |       | -    | -     |
| 86  | T | 1.00 | 1.42 | 0.95   | 0.55 | 4.45 | 4.88  | 4.24 | 5.27 | 0.61 | 0.38 | 0.63 | 0.80 | 2.01  | 2.63  | 1.42  | 1.48  | 0.56 | -0.25 |
| 87  | G | 1.00 | 0.88 | 1.05   | 0.76 | 0.31 | 0.23  | 0.46 | 0.29 | 1.39 | 1.05 | 1.36 | 1.86 | 0.80  | 0.87  | 0.65  | 0.79  | 0.74 | -0.13 |
| 88  | A | 1.00 | 0.77 | 0.88   | 1.03 | 6.17 | 6.24  | 5.76 | 8.50 | 0.68 | 0.63 | 0.88 | 0.65 | 1.07  | 1.39  | 0.78  | 1.08  | 1.07 | 0.03  |
| 89  | C | 1.00 | 0.72 | 0.98   | 0.87 | 0.57 | 0.65  | 0.27 | 0.46 | 1.63 | 1.50 | 1.60 | 1.68 | 0.80  | 1.13  | 0.81  | 0.80  | 0.97 | -0.01 |
| 90  | C | 1.00 | 1.28 | 0.98   | 0.79 | 0.47 | 0.31  | 0.94 | 0.93 | 1.33 | 0.99 | 1.03 | 1.27 | 8.11  | 10.53 | 6.77  | 5.91  | 0.77 | -0.12 |
| 91  | T | 1.00 | 0.84 | 1.02   | 1.09 | 0.74 | 0.52  | 0.33 | 0.31 | 0.39 | 0.41 | 0.54 | 0.51 | 3.13  | 4.31  | 2.66  | 2.56  | 0.61 | -0.21 |
| 92  | G | 1.00 | 0.71 | 0.92   | 0.84 | 1.19 | 0.90  | 1.31 | 1.77 | 0.45 | 0.65 | 0.57 | 0.52 | 0.84  | 1.10  | 0.62  | 0.67  | 0.68 | -0.16 |
| 93  | A |      |      |        |      |      |       |      |      |      |      |      |      |       |       |       |       | -    | -     |
| 94  | C | 1.00 | 1.32 | 1.06   | 1.17 | 1.12 | 0.97  | 1.13 | 1.18 | 0.91 | 0.88 | 1.06 | 1.19 | 1.65  | 1.07  | 1.94  | 1.56  | 0.73 | -0.14 |
| 95  | A | 1.00 | 0.39 | 0.41   | 0.21 | 0.02 | -0.10 | 0.10 | 0.11 | 0.31 | 1.13 | 0.70 | 0.38 | -0.54 | -0.57 | -0.73 | -0.55 | 0.84 | -0.08 |
| 96  | T | 1.00 | 1.08 | 1.25   | 1.14 | 1.05 | 1.19  | 0.96 | 1.27 | 1.42 | 0.93 | 0.94 | 1.18 | 1.36  | 1.14  | 1.74  | 1.66  | 1.47 | 0.17  |
| 97  | C | 1.00 | 1.19 | 1.10   | 1.15 | 1.20 | 1.05  | 1.15 | 0.93 | 0.83 | 0.53 | 0.56 | 0.32 | 0.73  | 1.29  | 0.85  | 0.81  | 2.92 | 0.47  |
| 98  | C | 1.00 | 1.12 | 1.01   | 1.03 | 0.98 | 0.73  | 0.56 | 0.64 | 0.70 | 0.74 | 0.65 | 0.73 | 0.54  | 0.48  | 0.87  | 1.09  | 1.93 | 0.29  |
| 99  | C | 1.00 | 0.98 | 1.05   | 1.24 | 0.73 | 0.64  | 0.54 | 0.59 | 0.92 | 0.77 | 0.74 | 0.70 | 0.80  | 0.32  | 0.85  | 0.85  | 1.40 | 0.14  |
| 100 | A | 1.00 | 0.83 | 0.79   | 0.80 | 0.53 | 0.34  | 0.59 | 0.63 | 0.46 | 0.58 | 0.45 | 0.68 | 0.66  | 0.35  | 0.83  | 0.84  | 0.87 | -0.06 |
| 101 | G | 1.00 | 1.05 | 0.84   | 0.69 | 0.65 | 0.89  | 0.73 | 0.57 | 0.88 | 0.55 | 0.83 | 0.84 | 1.39  | 0.98  | 1.82  | 1.72  | 1.30 | 0.11  |
| 102 | C | 1.00 | 0.84 | 1.39   | 1.06 | 0.98 | 1.09  | 1.04 | 0.78 | 0.75 | 0.37 | 1.21 | 0.77 | 1.11  | 1.25  | 0.87  | 1.42  | 1.25 | 0.10  |
| 103 | T | 1.00 | 0.71 | 0.98   | 0.53 | 0.56 | 0.35  | 0.87 | 1.04 | 0.62 | 0.67 | 0.65 | 0.48 | 0.70  | 0.39  | 0.93  | 0.67  | 1.25 | 0.10  |
| 104 | C | 1.00 | 1.65 | 1.12   | 1.93 | 0.67 | 1.04  | 0.92 | 1.33 | 1.45 | 1.50 | 1.06 | 0.67 | 3.76  | 2.33  | 6.10  | 3.33  | 1.92 | 0.28  |
| 105 | C | 1.00 | 1.47 | 0.87   | 1.54 | 0.93 | 0.79  | 0.45 | 0.87 | 0.88 | 1.25 | 1.31 | 1.33 | 1.34  | 0.92  | 1.26  | 1.47  | 0.72 | -0.14 |
| 106 | A | 1.00 | 1.11 | 0.91   | 0.97 | 0.75 | 0.69  | 0.66 | 0.93 | 1.78 | 1.00 | 1.19 | 0.96 | 0.89  | 0.73  | 1.15  | 2.08  | 4.33 | 0.64  |
| 107 | C | 1.00 | 0.65 | 0.69   | 0.68 | 0.65 | 0.42  | 0.56 | 0.28 | 0.33 | 0.33 | 0.26 | 0.33 | 0.35  | 0.35  | 0.42  | 0.15  | 0.41 | -0.38 |
| 108 | A | 1.00 | 1.11 | 0.82   | 1.00 | 0.59 | 0.97  | 0.65 | 0.91 | 0.82 | 0.90 | 1.13 | 1.15 | 1.25  | 0.47  | 1.47  | 1.77  | 1.01 | 0.00  |
| 109 | T | 1.00 | 0.76 | 0.93   | 0.69 | 0.64 | 0.26  | 0.61 | 0.47 | 0.52 | 0.44 | 0.51 | 0.34 | 0.39  | 0.45  | 0.41  | 0.43  | 1.71 | 0.23  |
| 110 | C | 1.00 | 1.00 | 0.89   | 0.98 | 0.77 | 0.72  | 0.83 | 0.63 | 0.65 | 0.31 | 0.43 | 0.57 | 0.66  | 0.64  | 0.72  | 0.63  | 1.10 | 0.04  |
| 111 | A | 1.00 | 0.73 | 0.76   | 0.83 | 0.60 | 0.64  | 0.53 | 0.47 | 0.66 | 0.53 | 0.57 | 0.61 | 0.55  | 0.51  | 0.65  | 0.86  | 1.68 | 0.23  |
| 112 | C | 1.00 | 1.16 | 1.07   | 1.05 | 0.68 | 0.84  | 0.85 | 1.39 | 0.52 | 0.87 | 0.86 | 0.89 | 0.85  | 0.71  | 0.54  | 1.03  | 0.70 | -0.15 |
| 113 | C | 1.00 | 1.25 | 1.48   | 1.56 | 1.50 | 1.10  | 1.33 | 0.88 | 1.16 | 0.93 | 1.06 | 0.93 | 0.56  | 0.70  | 1.31  | 0.95  | 2.12 | 0.33  |
| 114 | C | 1.00 | 0.70 | 0.85   | 1.01 | 0.78 | 0.52  | 0.66 | 0.59 | 0.72 | 0.67 | 0.65 | 0.64 | 0.69  | 0.39  | 0.94  | 0.81  | 1.31 | 0.12  |
| 115 | C | 1.00 | 0.81 | 0.76   | 0.75 | 0.67 | 0.50  | 0.66 | 0.83 | 0.48 | 0.48 | 0.58 | 0.38 | 0.73  | 0.59  | 0.88  | 0.78  | 1.37 | 0.14  |
| 116 | A | 1.00 | 0.78 | 0.83   | 0.58 | 0.59 | 0.75  | 0.70 | 0.82 | 0.93 | 0.58 | 0.53 | 0.63 | 0.86  | 0.51  | 0.91  | 0.96  | 1.64 | 0.22  |
| 117 | G | 1.00 | 1.63 | 1.24   | 1.37 | 1.01 | 1.28  | 1.16 | 0.67 | 3.11 | 3.29 | 4.05 | 4.71 | 1.12  | 1.20  | 1.49  | 1.26  | 0.74 | -0.13 |
| 118 | G | 1.00 | 1.29 | 1.06   | 1.33 | 2.62 | 2.91  | 2.56 | 2.39 | 0.90 | 0.84 | 0.74 | 1.05 | 0.54  | 0.98  | 0.37  | 0.77  | 1.23 | 0.09  |
| 119 | G | 1.00 | 1.14 | 0.99   | 0.99 | 1.47 | 1.77  | 1.66 | 1.44 | 0.90 | 0.86 | 1.03 | 0.77 | 0.49  | 0.49  | 0.60  | 0.65  | 1.53 | 0.19  |
| 120 | A | 1.00 | 0.68 | 0.81   | 0.97 | 0.97 | 0.79  | 0.81 | 0.82 | 0.32 | 0.37 | 0.46 | 0.36 | 0.47  | 0.25  | 0.75  | 0.80  | 1.49 | 0.17  |
| 121 | C | 1.00 | 0.85 | 1.16   | 0.95 | 0.80 | 0.82  | 0.93 | 0.94 | 0.92 | 1.01 | 1.33 | 1.10 | 1.32  | 0.87  | 1.43  | 1.05  | 0.66 | -0.18 |
| 122 | A | 1.00 | 0.70 | 0.62   | 0.75 | 0.17 | 0.18  | 0.20 | 0.23 | 1.32 | 0.44 | 0.60 | 0.56 | 0.82  | 0.41  | 0.85  | 1.00  | 2.90 | 0.46  |
| 123 | G | 1.00 | 1.55 | 1.43   | 1.16 | 1.05 | 1.43  | 0.82 | 1.09 | 3.01 | 3.58 | 4.37 | 4.49 | 1.16  | 1.57  | 1.24  | 1.09  | 0.63 | -0.20 |
| 124 | C | 1.00 | 1.0  | 0.8    | 0.9  | 4.52 | 4.30  | 4.10 | 3.33 | 0.36 | 0.78 | 0.49 | 0.74 | 0.69  | 0.46  | 0.92  | 0.78  | 0.56 | -0.25 |
| 125 | A | 1.00 | 0.66 | 0.59   | 0.50 | 0.22 | 0.13  | 0.19 | 0.26 | 0.99 | 0.37 | 0.41 | 0.49 | 0.41  | 0.29  | 0.50  | 0.70  | 3.48 | 0.54  |
| 126 | T | 1.00 | 1.05 | 0.87   | 0.89 | 0.64 | 0.75  | 0.64 | 1.04 | 1.13 | 1.56 | 1.65 | 1.58 | 1.69  | 1.08  | 1.63  | 1.03  | 0.44 | -0.36 |
| 127 | A | 1.00 | 1.03 | 1.40   | 1.55 | 0.98 | 0.78  | 0.83 | 0.91 | 1.50 | 0.78 | 1.04 | 0.96 | 0.71  | 0.68  | 1.17  | 1.46  | 3.19 | 0.50  |
| 128 | T | 1.00 | 1.37 | 1.28   | 1.16 | 1.17 | 1.14  | 0.98 | 0.96 | 2.84 | 3.14 | 3.44 | 3.41 | 0.77  | 1.18  | 1.00  | 0.77  | 0.84 | -0.08 |
| 129 | C | 1.00 | 0.94 | 1.18   | 0.71 | 0.67 | 0.83  | 1.01 | 0.99 | 0.85 | 1.00 | 1.11 | 1.04 | 0.86  | 0.96  | 0.95  | 0.96  | 0.90 | -0.05 |
| 130 | A | 1.00 | 0.50 | 0.51   | 0.61 | 0.35 | 0.28  | 0.37 | 0.28 | 0.87 | 0.36 | 0.41 | 0.41 | 0.46  | 0.20  | 0.59  | 0.64  | 2.98 | 0.47  |
| 131 | G | 1.00 | 1.32 | 1.17   | 1.21 | 0.71 | 1.12  | 0.84 | 0.71 | 3.00 | 3.08 | 3.42 | 3.60 | 1.11  | 1.05  | 1.51  | 1.34  | 1.01 | 0.00  |
| 132 | A | 1.00 | 0.87 | 1.42   | 1.34 | 6.62 | 6.14  | 5.49 | 6.06 | 0.76 | 0.87 | 0.77 | 1.16 | 0.98  | 1.39  | 1.39  | 1.03  | 0.68 | -0.17 |
| 133 | G | 1.00 | 1.06 | 1.13   | 0.92 | 0.38 | 0.71  | 0.72 | 1.46 | 2.07 | 1.98 | 2.20 | 1.93 | 0.99  | 1.16  | 1.03  | 0.81  | 0.88 | -0.06 |
| 134 | C | 1.00 | 0.79 | 0.87   | 1.10 | 1.28 | 1.02  | 0.92 | 0.63 | 0.49 | 0.53 | 0.58 | 0.54 | 0.48  | 0.47  | 0.66  | 0.77  | 1.44 | 0.16  |
| 135 | T | 1.00 | 0.79 | 0.95   | 1.13 | 0.78 | 0.91  | 0.84 | 1.00 | 0.91 | 1.02 | 0.85 | 0.80 | 1.31  | 0.86  | 1.63  | 1.40  | 1.20 | 0.08  |
| 136 | T | 1.00 | 0.98 | 0.97</ |      |      |       |      |      |      |      |      |      |       |       |       |       |      |       |

|     |   |      |      |      |      |      |      |      |      |      |      |      |      |      |      |      |      |      |       |
|-----|---|------|------|------|------|------|------|------|------|------|------|------|------|------|------|------|------|------|-------|
| 142 | A | 1.00 | 0.62 | 0.72 | 0.63 | 0.40 | 0.32 | 0.37 | 0.32 | 1.10 | 0.31 | 0.38 | 0.42 | 0.42 | 0.31 | 0.43 | 0.61 | 3.76 | 0.57  |
| 143 | G | 1.00 | 1.11 | 1.19 | 1.28 | 1.11 | 1.02 | 0.84 | 1.05 | 1.34 | 1.31 | 1.59 | 1.70 | 4.08 | 2.73 | 4.04 | 2.93 | 0.56 | -0.25 |
| 144 | G | 1.00 | 1.06 | 1.09 | 1.42 | 1.61 | 1.86 | 1.80 | 1.49 | 0.95 | 1.49 | 1.40 | 1.39 | 0.65 | 0.96 | 0.65 | 0.68 | 0.72 | -0.15 |
| 145 | T | 1.00 | 1.13 | 1.05 | 1.69 | 2.15 | 1.94 | 2.00 | 1.97 | 0.99 | 0.82 | 0.74 | 0.76 | 0.73 | 0.82 | 0.83 | 0.77 | 1.38 | 0.14  |
| 146 | A | 1.00 | 0.79 | 0.88 | 0.97 | 0.68 | 0.54 | 0.58 | 0.63 | 1.49 | 0.63 | 0.66 | 0.69 | 0.88 | 0.73 | 0.94 | 1.20 | 2.94 | 0.47  |
| 147 | G | 1.00 | 0.92 | 1.19 | 1.39 | 0.86 | 0.68 | 0.82 | 0.94 | 1.88 | 2.01 | 2.33 | 2.40 | 1.23 | 1.35 | 0.99 | 1.12 | 0.71 | -0.15 |
| 148 | T | 1.00 | 1.02 | 0.89 | 1.25 | 1.97 | 2.12 | 2.24 | 1.75 | 0.74 | 0.76 | 0.78 | 0.75 | 0.76 | 0.81 | 0.67 | 0.69 | 0.90 | -0.04 |
| 149 | G | 1.00 | 1.03 | 0.92 | 1.27 | 0.72 | 0.60 | 0.75 | 0.73 | 1.02 | 0.99 | 0.97 | 1.01 | 1.46 | 1.07 | 1.26 | 0.99 | 0.68 | -0.17 |
| 150 | A | 1.00 | 1.04 | 1.01 | 1.30 | 1.91 | 1.88 | 1.60 | 1.51 | 0.74 | 0.76 | 0.66 | 0.78 | 1.01 | 0.93 | 0.97 | 0.98 | 0.92 | -0.03 |
| 151 | A | 1.00 | 1.21 | 1.12 | 1.40 | 0.92 | 0.90 | 1.01 | 1.04 | 1.24 | 1.34 | 1.29 | 1.38 | 0.70 | 0.87 | 0.67 | 0.78 | 0.99 | 0.00  |
| 152 | T | 1.0  | 1.0  | 1.0  | 1.0  | 0.83 | 0.77 | 0.73 | 0.93 | 1.21 | 1.20 | 1.23 | 1.26 | 1.77 | 1.27 | 1.28 | 1.26 | 0.69 | -0.16 |
| 153 | G | 1.00 | 0.88 | 1.15 | 1.32 | 0.75 | 0.68 | 0.72 | 0.73 | 1.19 | 1.39 | 1.53 | 1.42 | 1.30 | 1.05 | 1.23 | 1.18 | 0.76 | -0.12 |
| 154 | A | 1.00 | 0.88 | 0.98 | 1.06 | 3.02 | 3.16 | 2.45 | 2.29 | 0.66 | 0.62 | 0.69 | 0.77 | 0.70 | 0.70 | 0.77 | 0.76 | 0.95 | -0.02 |
| 155 | A | 1.00 | 0.95 | 1.20 | 1.23 | 0.97 | 0.85 | 0.70 | 0.91 | 3.74 | 4.72 | 5.02 | 4.78 | 0.74 | 0.76 | 0.77 | 0.83 | 0.88 | -0.06 |
| 156 | C | 1.00 | 1.07 | 1.11 | 1.11 | 0.78 | 0.61 | 0.94 | 0.99 | 2.44 | 2.88 | 2.89 | 2.70 | 0.83 | 0.91 | 0.76 | 0.79 | 0.86 | -0.07 |
| 157 | T | 1.00 | 0.92 | 0.99 | 0.99 | 0.92 | 0.66 | 0.92 | 0.93 | 0.74 | 0.82 | 0.82 | 0.73 | 0.78 | 0.63 | 0.69 | 0.78 | 1.01 | 0.01  |
| 158 | C | 1.00 | 1.05 | 1.13 | 1.13 | 0.93 | 0.91 | 1.06 | 1.05 | 0.82 | 0.83 | 0.79 | 0.82 | 1.37 | 1.31 | 1.37 | 1.48 | 1.07 | 0.03  |
| 159 | T | 1.00 | 0.98 | 0.86 | 0.91 | 0.76 | 0.62 | 0.70 | 0.74 | 0.65 | 0.74 | 0.74 | 0.74 | 0.58 | 0.64 | 0.70 | 0.72 | 1.08 | 0.03  |
| 160 | T | 1.00 | 0.82 | 0.97 | 1.03 | 0.82 | 0.94 | 0.84 | 0.92 | 1.16 | 1.33 | 1.34 | 1.29 | 0.78 | 0.73 | 0.63 | 0.77 | 0.88 | -0.05 |
| 161 | C | 1.00 | 1.16 | 1.26 | 1.56 | 1.13 | 1.02 | 1.02 | 0.96 | 0.69 | 0.84 | 0.84 | 0.95 | 0.87 | 0.90 | 0.61 | 0.80 | 0.66 | -0.18 |
| 162 | C | 1.00 | 0.87 | 1.21 | 0.65 | 0.77 | 0.57 | 0.67 | 0.67 | 1.03 | 0.76 | 0.68 | 0.53 | 1.21 | 0.98 | 1.04 | 1.05 | 1.69 | 0.23  |
| 163 | G | 1.00 | 0.83 | 0.89 | 1.03 | 0.99 | 0.87 | 1.09 | 1.20 | 0.85 | 1.14 | 1.13 | 1.34 | 3.23 | 3.04 | 3.17 | 3.05 | 0.60 | -0.22 |
| 164 | G | 1.00 | 0.95 | 1.15 | 1.06 | 1.12 | 1.10 | 1.17 | 1.26 | 0.91 | 1.33 | 1.22 | 1.16 | 2.43 | 2.06 | 2.03 | 1.87 | 0.60 | -0.22 |
| 165 | G | 1.00 | 0.96 | 1.13 | 0.98 | 1.32 | 1.25 | 1.08 | 1.19 | 0.89 | 1.18 | 1.05 | 1.05 | 0.74 | 0.61 | 0.71 | 0.79 | 0.90 | -0.05 |
| 166 | A | 1.00 | 0.91 | 1.07 | 1.05 | 2.30 | 2.38 | 1.95 | 1.97 | 0.69 | 0.93 | 0.81 | 0.86 | 0.76 | 0.70 | 0.57 | 0.72 | 0.77 | -0.11 |
| 167 | T | 1.00 | 1.33 | 1.30 | 0.76 | 0.64 | 0.56 | 0.47 | 0.53 | 0.74 | 1.05 | 0.99 | 0.85 | 0.45 | 0.53 | 0.45 | 0.55 | 1.06 | 0.03  |
| 168 | G | 1.00 | 0.99 | 0.97 | 1.25 | 1.16 | 1.17 | 1.19 | 1.23 | 1.27 | 1.90 | 1.46 | 1.45 | 1.25 | 1.42 | 1.24 | 1.32 | 0.93 | -0.03 |
| 169 | G | 1.00 | 1.39 | 1.24 | 1.46 | 2.06 | 2.04 | 1.87 | 1.70 | 1.58 | 2.34 | 1.95 | 1.65 | 0.99 | 0.90 | 0.79 | 0.93 | 0.89 | -0.05 |
| 170 | G | 1.00 | 1.16 | 1.07 | 1.17 | 1.64 | 1.71 | 1.46 | 1.37 | 1.28 | 1.91 | 1.67 | 1.36 | 0.83 | 0.77 | 0.75 | 0.84 | 0.95 | -0.02 |
| 171 | G | 1.00 | 0.84 | 0.86 | 0.87 | 1.50 | 1.82 | 1.49 | 1.21 | 1.29 | 1.95 | 1.51 | 1.17 | 0.71 | 0.60 | 0.72 | 0.85 | 1.32 | 0.12  |
| 172 | T | 1.00 | 0.84 | 0.97 | 0.87 | 1.04 | 1.12 | 0.91 | 0.78 | 0.55 | 0.72 | 0.66 | 0.61 | 0.64 | 0.41 | 0.72 | 0.84 | 1.18 | 0.07  |
| 173 | A | 1.00 | 0.95 | 0.93 | 0.82 | 0.56 | 0.53 | 0.57 | 0.57 | 0.82 | 0.71 | 0.69 | 0.62 | 0.70 | 0.58 | 0.70 | 0.78 | 1.48 | 0.17  |
| 174 | A | 1.00 | 1.11 | 1.25 | 1.18 | 1.01 | 0.87 | 1.06 | 1.13 | 1.40 | 1.79 | 1.67 | 1.38 | 1.10 | 1.42 | 1.03 | 1.04 | 0.96 | -0.02 |
| 175 | A | 1.00 | 1.19 | 1.06 | 1.31 | 1.01 | 1.00 | 1.08 | 1.13 | 1.13 | 1.27 | 1.39 | 1.33 | 0.83 | 0.94 | 0.76 | 0.90 | 0.91 | -0.04 |
| 176 | C | 1.00 | 1.08 | 1.06 | 1.23 | 0.94 | 0.87 | 0.99 | 0.95 | 1.19 | 1.28 | 1.37 | 1.28 | 0.80 | 0.86 | 0.69 | 0.83 | 0.96 | -0.02 |
| 177 | T | 1.00 | 1.10 | 1.15 | 1.23 | 0.86 | 0.83 | 1.02 | 0.95 | 0.87 | 0.77 | 0.79 | 0.85 | 0.75 | 0.82 | 0.91 | 0.86 | 1.17 | 0.07  |
| 178 | G | 1.00 | 0.94 | 1.09 | 1.10 | 0.75 | 0.74 | 0.82 | 0.82 | 0.61 | 0.60 | 0.68 | 0.59 | 0.68 | 0.64 | 0.76 | 0.74 | 1.14 | 0.06  |
| 179 | G | 1.00 | 0.74 | 0.83 | 0.71 | 0.94 | 1.04 | 0.95 | 1.12 | 0.63 | 0.71 | 0.83 | 0.83 | 0.84 | 0.63 | 0.89 | 0.80 | 0.73 | -0.14 |
| 180 | G | 1.00 | 1.48 | 1.45 | 1.55 | 1.44 | 1.49 | 1.56 | 1.72 | 1.30 | 1.34 | 1.26 | 1.41 | 1.12 | 1.57 | 1.43 | 1.17 | 0.96 | -0.02 |
| 181 | G | 1.00 | 1.01 | 1.05 | 1.03 | 0.79 | 0.87 | 0.81 | 0.81 | 0.71 | 0.84 | 0.86 | 0.83 | 1.13 | 1.28 | 1.17 | 1.10 | 0.84 | -0.08 |
| 182 | T | 1.00 | 0.91 | 0.95 | 0.87 | 0.71 | 0.83 | 0.74 | 0.70 | 0.67 | 0.78 | 0.70 | 0.69 | 0.68 | 0.47 | 0.74 | 0.80 | 1.16 | 0.06  |
| 183 | C | 1.00 | 0.92 | 1.04 | 0.86 | 0.64 | 0.69 | 0.76 | 0.71 | 0.65 | 0.74 | 0.71 | 0.64 | 2.03 | 2.96 | 1.90 | 1.73 | 0.87 | -0.06 |
| 184 | G | 1.00 | 1.17 | 1.07 | 1.08 | 0.65 | 0.75 | 0.66 | 0.69 | 0.85 | 1.02 | 0.93 | 0.87 | 2.32 | 3.21 | 1.90 | 1.64 | 0.69 | -0.16 |
| 185 | C | 1.00 | 1.73 | 1.00 | 1.16 | 3.66 | 3.72 | 4.22 | 3.66 | 0.85 | 1.12 | 1.03 | 1.17 | 4.67 | 7.24 | 3.78 | 2.83 | 0.44 | -0.36 |
| 186 | A | 1.00 | 1.21 | 0.91 | 0.88 | 0.56 | 0.49 | 0.56 | 0.51 | 1.29 | 0.59 | 0.53 | 0.58 | 0.59 | 0.45 | 0.54 | 0.71 | 2.67 | 0.43  |
| 187 | T | 1.00 | 1.46 | 1.03 | 1.38 | 0.90 | 1.02 | 1.17 | 1.17 | 3.37 | 4.24 | 4.12 | 4.34 | 3.08 | 4.79 | 2.64 | 2.30 | 0.58 | -0.24 |
| 188 | T | 1.00 | 1.18 | 1.10 | 1.03 | 0.80 | 0.91 | 0.92 | 1.05 | 1.98 | 2.23 | 2.33 | 2.74 | 1.52 | 2.23 | 1.14 | 1.04 | 0.50 | -0.30 |
| 189 | G | 1.00 | 1.11 | 0.98 | 1.29 | 0.72 | 0.85 | 0.79 | 0.84 | 1.72 | 1.78 | 1.82 | 2.14 | 1.01 | 1.27 | 0.81 | 0.77 | 0.61 | -0.21 |
| 190 | T | 1.00 | 1.02 | 1.22 | 0.99 | 3.18 | 3.36 | 3.72 | 3.84 | 0.66 | 0.57 | 0.69 | 0.68 | 1.46 | 1.89 | 1.10 | 0.96 | 0.65 | -0.19 |
| 191 | G | 1.00 | 1.07 | 1.04 | 1.08 | 0.49 | 0.48 | 0.57 | 0.54 | 1.11 | 0.99 | 1.06 | 1.19 | 1.41 | 1.69 | 1.09 | 1.00 | 0.66 | -0.18 |
| 192 | G | 1.00 | 1.10 | 1.23 | 1.16 | 1.98 | 2.15 | 2.24 | 2.75 | 1.49 | 1.72 | 1.84 | 2.14 | 1.41 | 1.76 | 1.21 | 1.22 | 0.60 | -0.22 |
| 193 | C | 1.00 | 0.82 | 0.96 | 0.67 | 1.34 | 1.54 | 1.48 | 1.85 | 0.65 | 0.75 | 0.80 | 0.81 | 0.98 | 0.69 | 0.90 | 1.00 | 0.82 | -0.09 |
| 194 | C | 1.00 | 1.17 | 1.25 | 1.15 | 0.87 | 0.90 | 0.83 | 0.83 | 0.63 | 0.82 | 0.78 | 0.73 | 1.10 | 1.19 | 0.97 | 1.06 | 0.82 | -0.09 |
| 195 | T | 1.00 | 1.27 | 1.22 | 1.22 | 1.28 | 1.27 | 1.42 | 1.25 | 1.15 | 1.20 | 1.39 | 1.18 | 1.14 | 1.04 | 1.12 | 1.28 | 1.10 | 0.04  |
| 196 | T | 1.00 | 1.39 | 1.48 | 1.33 | 0.92 | 0.92 | 1.07 | 0.99 | 1.01 | 0.98 | 1.36 | 1.06 | 1.04 | 0.91 | 0.95 | 1.14 | 1.05 | 0.02  |
| 197 | T | 1.00 | 1.10 | 0.97 | 0.98 | 0.93 | 0.80 | 0.98 | 0.97 | 0.83 | 0.99 | 1.10 | 1.02 | 0.80 | 0.70 | 0.78 | 0.85 | 0.86 | -0.06 |
| 198 | T | 1.00 | 1.06 | 0.90 | 0.92 | 0.91 | 0.86 | 0.92 | 0.91 | 0.98 | 1.20 | 1.11 | 1.10 | 0.80 | 0.71 | 0.69 | 0.70 | 0.79 | -0.10 |
| 199 | T | 1.00 | 0.81 | 0.93 | 0.94 | 0.89 | 0.85 | 0.85 | 0.80 | 0.96 | 1.08 | 1.04 | 1.02 | 0.80 | 0.67 | 0.66 | 0.67 | 0.78 | -0.11 |
| 200 | C | 1.00 | 0.90 | 0.89 | 0.88 | 0.94 | 0.82 | 0.88 | 0.92 | 0.92 | 1.02 | 0.82 | 0.97 | 1.12 | 0.95 | 0.87 | 0.88 | 0.74 | -0.13 |
| 201 | T | 1.00 | 0.88 | 1.14 | 1.12 | 1.27 | 1.12 | 1.30 | 1.11 | 1.30 | 1.52 | 1.13 | 1.27 | 1.12 | 1.08 | 0.97 | 1.04 | 0.95 | -0.02 |
| 202 | C | 1.00 | 0.97 | 3.25 | 2.82 | 3.84 | 3.72 | 2.77 | 3.83 | 3.77 | 3.57 | 3.40 | 2.52 | 5.26 | 6.22 | 5.47 | 5.43 | 1.55 | 0.19  |
| 203 | C | 1.00 | 0.85 | 0.26 | 0.32 | 0.23 | 0.29 | 0.30 | 0.25 | 0.04 | 0.17 | 0.20 | 0.37 | 0.57 | 0.30 | 0.88 | 0.82 | 0.16 | -0.79 |
| 204 | T | 1.00 | 1.19 | 1.06 | 1.06 | 0.62 | 0.55 | 0.74 | 0.62 | 0.68 | 0.90 | 0.65 | 0.94 | 1.07 | 0.57 | 0.16 | 0.23 | 0.15 | -0.82 |
| 205 | T | 1.00 | 1.00 | 1.08 | 1.01 | 0.71 | 0.72 | 0.70 | 0.72 | 0.89 | 0.82 | 0.95 | 0.84 | 0.80 | 0.77 | 0.64 | 0.71 | 0.94 | -0.03 |
| 206 | C | 1.00 | 0.85 | 0.94 | 0.84 | 0.99 | 0.85 | 0.95 | 0.91 | 0.91 | 0.85 | 0.91 | 0.98 | 1.47 | 1.43 | 1.37 | 1.51 | 0.96 | -0.02 |
| 207 | G | 1.00 | 0.87 | 0.82 | 0.91 | 0.92 | 0.90 | 0.58 | 0.85 | 0.80 | 0.82 | 0.82 | 0.85 | 1.13 | 1.16 | 1.09 | 1.11 | 0.93 | -0.03 |
| 208 | G | 1.00 | 0.78 | 0.73 | 0.83 | 1.26 | 1.12 | 1.39 | 1.29 | 1.00 | 0.73 | 0.92 | 0.93 | 0.79 | 0.80 | 0.93 | 0.83 | 1.14 | 0.06  |
| 209 | C | 1.00 | 1.15 | 1.43 | 1.50 | 1.37 | 1.29 | 1.42 | 1.43 | 1.04 | 0.98 | 1.18 | 1.38 | 0.86 | 0.87 | 0.85 | 1.06 | 0.93 | -0.03 |
| 210 | G | 1.00 | 0.81 | 0.83 | 0.81 | 0.52 | 0.47 | 0.48 | 0.57 | 0.69 | 0.54 | 0.64 | 0.57 | 0.50 | 0.54 | 0.54 | 0.53 | 1.29 | 0.11  |
| 211 |   |      |      |      |      |      |      |      |      |      |      |      |      |      |      |      |      |      |       |

|     |   |      |      |      |      |       |       |       |       |       |       |       |       |      |      |      |      |      |       |
|-----|---|------|------|------|------|-------|-------|-------|-------|-------|-------|-------|-------|------|------|------|------|------|-------|
| 218 | G | 1.00 | 1.57 | 1.11 | 1.27 | 1.00  | 1.32  | 1.20  | 1.09  | 1.44  | 1.03  | 1.38  | 1.40  | 3.18 | 3.30 | 3.04 | 2.57 | 0.83 | -0.08 |
| 219 | T | 1.00 | 1.31 | 1.27 | 1.21 | 1.71  | 2.49  | 2.33  | 2.04  | 1.37  | 0.95  | 1.17  | 1.07  | 1.17 | 1.36 | 1.13 | 1.14 | 1.24 | 0.09  |
| 220 | G | 1.00 | 1.74 | 1.11 | 1.18 | 0.87  | 1.08  | 0.90  | 0.94  | 1.38  | 1.29  | 1.28  | 1.35  | 1.57 | 1.49 | 1.37 | 1.16 | 0.76 | -0.12 |
| 221 | C | 1.00 | 1.50 | 1.88 | 1.84 | 2.68  | 3.47  | 3.74  | 3.30  | 2.20  | 1.59  | 1.81  | 1.94  | 2.45 | 2.48 | 2.01 | 1.95 | 0.90 | -0.05 |
| 222 | G | 1.00 | 1.39 | 1.24 | 0.97 | 1.08  | 1.00  | 1.24  | 1.00  | 1.23  | 1.00  | 0.95  | 0.96  | 1.35 | 1.60 | 1.40 | 1.28 | 1.21 | 0.08  |
| 223 | T | 1.00 | 1.44 | 1.11 | 1.41 | 1.92  | 2.65  | 2.11  | 2.32  | 1.79  | 1.31  | 1.38  | 1.52  | 5.03 | 5.37 | 5.52 | 5.93 | 1.39 | 0.14  |
| 224 | G | 1.00 | 0.31 | 1.00 | 1.37 | 2.09  | 2.11  | 3.11  | 3.34  | 2.63  | 2.43  | 3.18  | 2.97  | 4.47 | 4.42 | 3.82 | 4.34 | 0.86 | -0.07 |
| 225 | G | 1.00 | 1.84 | 1.83 | 1.63 | 1.09  | 1.29  | 1.23  | 0.88  | 1.59  | 0.95  | 1.01  | 1.06  | 0.82 | 1.02 | 0.96 | 0.90 | 1.63 | 0.21  |
| 226 | A | 1.00 | 1.02 | 0.98 | 0.95 | 2.66  | 2.74  | 2.74  | 2.77  | 0.40  | 0.78  | 0.62  | 0.52  | 0.46 | 0.29 | 0.45 | 0.50 | 0.82 | -0.09 |
| 227 | A | 1.00 | 1.0  | 1.0  | 1.0  | 0.46  | 0.51  | 0.57  | 0.54  | 0.84  | 0.77  | 1.03  | 0.96  | 1.1  | 0.5  | 0.9  | 1.0  | 0.76 | -0.12 |
| 228 | A | 1.00 | 1.02 | 1.13 | 1.02 | 0.56  | 0.76  | 0.76  | 0.72  | 1.02  | 1.41  | 1.56  | 1.44  | 1.35 | 0.88 | 1.14 | 1.25 | 0.65 | -0.19 |
| 229 | G | 1.00 | 1.01 | 1.00 | 0.91 | 0.80  | 1.33  | 0.91  | 1.20  | 2.06  | 2.21  | 2.12  | 1.90  | 0.78 | 0.52 | 0.63 | 0.83 | 1.16 | 0.06  |
| 230 | C | 1.00 | 1.09 | 0.97 | 1.01 | 2.87  | 2.93  | 2.70  | 2.40  | 1.07  | 1.06  | 1.04  | 0.93  | 1.10 | 0.60 | 0.98 | 1.14 | 1.20 | 0.08  |
| 231 | G | 1.00 | 1.11 | 1.09 | 1.35 | 0.79  | 1.41  | 0.94  | 1.14  | 1.09  | 1.02  | 0.96  | 0.96  | 1.06 | 0.63 | 0.88 | 0.95 | 1.02 | 0.01  |
| 232 | T | 1.00 | 1.08 | 1.13 | 1.22 | 4.64  | 4.22  | 4.15  | 3.73  | 1.51  | 1.30  | 0.99  | 1.04  | 2.36 | 1.46 | 1.93 | 2.16 | 1.32 | 0.12  |
| 233 | A | 1.00 | 0.99 | 1.07 | 1.10 | 0.51  | 0.28  | 0.37  | 0.41  | 1.31  | 0.43  | 0.60  | 0.65  | 0.61 | 0.23 | 0.58 | 0.91 | 3.01 | 0.48  |
| 234 | G | 1.00 | 1.16 | 1.29 | 1.27 | 1.67  | 1.92  | 2.09  | 1.78  | 4.08  | 3.64  | 4.05  | 3.95  | 1.01 | 0.95 | 0.95 | 0.97 | 0.99 | 0.00  |
| 235 | A | 1.00 | 0.84 | 0.96 | 0.91 | 6.18  | 5.76  | 5.00  | 5.62  | 1.73  | 1.50  | 1.08  | 0.96  | 0.87 | 0.62 | 0.68 | 0.75 | 1.54 | 0.19  |
| 236 | C | 1.00 | 1.09 | 0.89 | 1.11 | 0.91  | 0.81  | 0.83  | 0.73  | 1.83  | 1.73  | 1.89  | 1.97  | 1.10 | 0.82 | 0.97 | 1.15 | 0.97 | -0.01 |
| 237 | A | 1.00 | 1.01 | 0.99 | 1.13 | 0.65  | 0.32  | 0.41  | 0.44  | 1.58  | 0.44  | 0.60  | 0.84  | 0.64 | 0.26 | 0.61 | 0.79 | 2.34 | 0.37  |
| 238 | A | 1.00 | 0.98 | 1.21 | 0.88 | 0.71  | 0.67  | 0.77  | 0.77  | 0.71  | 0.89  | 1.29  | 0.95  | 1.69 | 1.11 | 1.44 | 1.43 | 0.64 | -0.20 |
| 239 | G | 1.00 | 0.86 | 0.95 | 0.80 | 0.64  | 0.73  | 0.77  | 0.82  | 1.22  | 1.06  | 1.46  | 1.25  | 1.69 | 1.07 | 1.39 | 1.43 | 0.83 | -0.08 |
| 240 | G | 1.00 | 1.10 | 1.05 | 0.83 | 1.45  | 1.19  | 1.31  | 1.18  | 0.82  | 0.61  | 0.75  | 0.62  | 1.01 | 0.66 | 0.97 | 1.12 | 1.46 | 0.17  |
| 241 | A | 1.00 | 1.05 | 1.04 | 0.91 | 1.13  | 0.93  | 1.12  | 0.99  | 0.44  | 0.55  | 0.42  | 0.46  | 0.66 | 0.41 | 0.66 | 0.79 | 1.14 | 0.06  |
| 242 | G | 1.00 | 1.01 | 1.08 | 0.91 | 0.57  | 0.48  | 0.64  | 0.60  | 0.79  | 0.79  | 0.80  | 0.80  | 1.00 | 0.55 | 0.83 | 1.00 | 0.99 | 0.00  |
| 243 | A | 1.00 | 1.10 | 1.11 | 0.79 | 1.40  | 1.17  | 1.35  | 1.26  | 0.61  | 0.49  | 0.54  | 0.51  | 1.00 | 0.57 | 0.83 | 0.96 | 1.14 | 0.06  |
| 244 | T | 1.00 | 1.13 | 1.21 | 1.01 | 0.55  | 0.52  | 0.57  | 0.55  | 1.00  | 0.73  | 0.73  | 0.78  | 1.25 | 0.68 | 1.11 | 1.14 | 1.18 | 0.07  |
| 245 | G | 1.00 | 1.06 | 1.13 | 1.07 | 0.54  | 0.52  | 0.59  | 0.57  | 1.11  | 0.78  | 0.82  | 0.81  | 2.31 | 1.39 | 2.22 | 2.40 | 1.43 | 0.15  |
| 246 | C | 1.00 | 1.09 | 1.04 | 1.07 | 1.55  | 1.38  | 1.43  | 1.37  | 0.80  | 0.59  | 0.60  | 0.62  | 1.89 | 1.26 | 2.03 | 2.23 | 1.50 | 0.18  |
| 247 | A | 1.00 | 1.07 | 1.03 | 1.00 | 0.73  | 0.38  | 0.47  | 0.52  | 1.57  | 0.47  | 0.57  | 0.78  | 0.82 | 0.45 | 0.80 | 0.95 | 2.34 | 0.37  |
| 248 | G | 1.00 | 1.11 | 1.04 | 1.18 | 0.86  | 0.84  | 0.86  | 0.88  | 1.38  | 1.19  | 1.64  | 1.29  | 4.06 | 2.65 | 3.94 | 4.19 | 1.10 | 0.04  |
| 249 | G | 1.00 | 0.98 | 1.11 | 1.01 | 1.19  | 1.13  | 1.23  | 1.18  | 0.65  | 0.67  | 0.68  | 0.61  | 0.51 | 0.42 | 0.53 | 0.53 | 1.11 | 0.04  |
| 250 | T | 1.00 | 0.98 | 0.97 | 0.86 | 0.82  | 0.77  | 0.90  | 0.86  | 0.25  | 0.41  | 0.46  | 0.37  | 0.34 | 0.20 | 0.37 | 0.40 | 0.82 | -0.09 |
| 251 | A | 1.00 | 1.01 | 1.09 | 1.14 | 0.58  | 0.37  | 0.52  | 0.50  | 1.23  | 0.47  | 0.57  | 0.58  | 0.60 | 0.27 | 0.52 | 0.69 | 2.46 | 0.39  |
| 252 | T | 1.00 | 0.58 | 0.00 | 0.60 | 0.15  | 0.38  | 0.45  | 0.51  | 1.42  | 1.27  | 1.76  | 1.45  | 0.72 | 0.50 | 0.58 | 0.51 | 0.70 | -0.16 |
| 253 | T | 1.00 | 0.15 | 0.95 | 0.55 | 0.50  | 0.37  | 0.47  | 0.50  | 0.71  | 0.60  | 1.11  | 0.87  | 1.54 | 1.22 | 1.30 | 1.25 | 0.66 | -0.18 |
| 254 | G | 1.00 | 1.85 | 1.51 | 1.85 | 1.39  | 1.02  | 1.08  | 1.18  | 2.20  | 1.58  | 1.21  | 1.95  | 5.85 | 4.15 | 4.39 | 3.85 | 0.74 | -0.13 |
| 255 | G | 1.0  | 58.8 | 61.7 | 65.7 | 210.1 | 218.6 | 219.2 | 227.6 | 158.6 | 131.0 | 182.5 | 169.8 | 80.0 | 56.4 | 66.7 | 62.4 | 0.73 | -0.14 |
| 256 | T | 1.00 | 1.22 | 1.16 | 1.07 | 3.20  | 3.57  | 3.71  | 4.28  | 0.69  | 0.80  | 0.96  | 1.00  | 2.05 | 2.17 | 1.57 | 1.51 | 0.50 | -0.30 |
| 257 | G | 1.00 | 1.07 | 0.98 | 1.19 | 0.54  | 0.57  | 0.63  | 0.58  | 1.28  | 0.89  | 1.23  | 1.09  | 1.05 | 0.97 | 0.91 | 0.93 | 1.03 | 0.01  |
| 258 | A | 1.00 | 0.95 | 0.94 | 0.94 | 1.28  | 1.30  | 1.34  | 1.27  | 0.42  | 0.52  | 0.48  | 0.47  | 0.67 | 0.56 | 0.68 | 0.67 | 0.87 | -0.06 |
| 259 | G | 1.00 | 1.06 | 1.07 | 1.00 | 1.68  | 1.72  | 1.39  | 1.60  | 1.50  | 1.60  | 1.63  | 1.52  | 0.85 | 0.73 | 0.83 | 0.84 | 0.98 | -0.01 |
| 260 | T | 1.00 | 0.95 | 0.93 | 0.91 | 2.44  | 2.66  | 2.94  | 2.34  | 0.68  | 0.76  | 0.70  | 0.71  | 0.84 | 0.70 | 0.80 | 0.83 | 0.94 | -0.03 |
| 261 | C | 1.00 | 1.10 | 1.06 | 1.02 | 0.58  | 0.47  | 0.64  | 0.65  | 0.93  | 0.74  | 0.72  | 0.77  | 1.06 | 1.01 | 1.11 | 1.22 | 1.38 | 0.14  |
| 262 | G | 1.00 | 1.03 | 0.99 | 1.17 | 0.68  | 0.53  | 0.62  | 0.69  | 0.68  | 0.73  | 0.64  | 0.72  | 1.55 | 1.41 | 1.36 | 1.22 | 0.75 | -0.13 |
| 263 | G | 1.00 | 1.07 | 0.96 | 1.04 | 0.68  | 0.53  | 0.73  | 0.70  | 0.58  | 0.80  | 0.80  | 0.89  | 1.21 | 1.22 | 1.15 | 0.89 | 0.49 | -0.31 |
| 264 | A | 1.00 | 0.97 | 1.06 | 0.81 | 0.82  | 0.65  | 0.81  | 0.84  | 0.45  | 0.54  | 0.50  | 0.50  | 0.68 | 0.51 | 0.69 | 0.69 | 0.93 | -0.03 |
| 265 | T | 1.00 | 1.08 | 1.10 | 0.91 | 0.51  | 0.46  | 0.55  | 0.54  | 0.60  | 0.73  | 0.74  | 0.78  | 0.97 | 0.75 | 0.96 | 0.93 | 0.74 | -0.13 |
| 266 | C | 1.00 | 1.13 | 1.09 | 1.08 | 0.61  | 0.49  | 0.68  | 0.65  | 0.73  | 0.73  | 0.61  | 0.74  | 2.21 | 1.78 | 2.08 | 1.85 | 0.83 | -0.08 |
| 267 | G | 1.00 | 1.13 | 1.09 | 1.17 | 0.61  | 0.59  | 0.78  | 0.70  | 1.42  | 0.95  | 1.02  | 1.28  | 1.00 | 0.90 | 0.95 | 0.95 | 1.06 | 0.02  |
| 268 | C | 1.00 | 1.07 | 1.07 | 0.96 | 1.26  | 1.13  | 1.33  | 1.43  | 0.74  | 0.56  | 0.52  | 0.65  | 0.65 | 0.58 | 0.66 | 0.63 | 1.12 | 0.05  |
| 269 | A | 1.00 | 1.05 | 1.02 | 1.04 | 0.62  | 0.41  | 0.53  | 0.51  | 0.99  | 0.46  | 0.58  | 0.72  | 0.51 | 0.26 | 0.55 | 0.62 | 1.65 | 0.22  |
| 270 | G | 1.00 | 0.87 | 0.89 | 1.02 | 0.98  | 0.91  | 1.06  | 0.91  | 2.24  | 2.57  | 3.81  | 4.12  | 1.47 | 1.42 | 1.40 | 1.21 | 0.45 | -0.35 |
| 271 | C | 1.00 | 1.03 | 0.87 | 0.91 | 1.79  | 1.76  | 2.17  | 2.58  | 0.59  | 0.62  | 0.71  | 0.78  | 0.63 | 0.46 | 0.66 | 0.63 | 0.76 | -0.12 |
| 272 | T | 1.00 | 0.91 | 0.97 | 0.99 | 0.80  | 0.61  | 0.73  | 0.76  | 1.06  | 1.02  | 1.63  | 1.56  | 1.21 | 1.08 | 1.17 | 1.06 | 0.60 | -0.22 |
| 273 | T | 1.00 | 0.87 | 0.97 | 1.03 | 0.79  | 0.72  | 0.89  | 0.89  | 0.76  | 0.93  | 0.84  | 1.06  | 2.25 | 2.29 | 2.10 | 1.93 | 0.61 | -0.21 |
| 274 | G | 1.00 | 0.96 | 0.90 | 1.13 | 0.71  | 0.68  | 0.71  | 0.76  | 0.95  | 1.13  | 1.21  | 1.24  | 0.85 | 0.73 | 0.84 | 0.77 | 0.69 | -0.16 |
| 275 | G | 1.00 | 1.00 | 1.09 | 1.11 | 2.44  | 2.41  | 2.59  | 2.81  | 1.49  | 2.10  | 1.96  | 2.09  | 1.34 | 1.16 | 1.05 | 0.99 | 0.53 | -0.28 |
| 276 | A | 1.00 | 0.86 | 0.84 | 0.82 | 2.77  | 2.79  | 2.92  | 3.35  | 0.66  | 0.85  | 0.85  | 0.96  | 1.26 | 0.94 | 0.89 | 0.82 | 0.45 | -0.34 |
| 277 | T | 1.00 | 1.02 | 1.05 | 1.09 | 0.83  | 0.85  | 0.91  | 0.93  | 1.12  | 1.48  | 1.79  | 2.03  | 1.00 | 2.27 | 1.73 | 1.47 | 0.82 | -0.09 |
| 278 | G | 1.00 | 1.01 | 0.96 | 1.00 | 0.70  | 0.52  | 0.64  | 0.58  | 0.81  | 0.90  | 0.81  | 0.79  | 1.65 | 2.18 | 1.65 | 1.28 | 0.80 | -0.10 |
| 279 | G | 1.00 | 1.06 | 1.04 | 1.04 | 1.10  | 1.14  | 1.21  | 1.07  | 0.92  | 1.02  | 0.85  | 0.98  | 1.67 | 0.91 | 1.26 | 1.44 | 0.80 | -0.10 |
| 280 | C | 1.00 | 1.06 | 1.03 | 1.08 | 1.50  | 1.58  | 1.61  | 1.42  | 0.97  | 0.94  | 0.72  | 0.89  | 1.06 | 0.73 | 0.87 | 0.78 | 0.80 | -0.09 |
| 281 | C | 1.00 | 1.07 | 0.95 | 1.12 | 0.81  | 1.08  | 1.22  | 1.00  | 1.11  | 0.96  | 0.86  | 0.95  | 1.56 | 2.95 | 2.24 | 1.76 | 1.32 | 0.12  |
| 282 | A | 1.00 | 0.99 | 0.98 | 0.96 | 0.76  | 0.80  | 0.86  | 0.75  | 1.04  | 0.69  | 0.70  | 0.79  | 0.82 | 0.83 | 0.76 | 0.68 | 1.09 | 0.04  |
| 283 | C | 1.00 | 0.90 | 0.84 | 1.04 | 0.70  | 0.59  | 0.75  | 0.70  | 0.72  | 0.85  | 0.82  | 0.94  | 1.18 | 1.68 | 1.18 | 1.02 | 0.65 | -0.18 |
| 284 | T | 1.00 | 0.93 | 0.95 | 0.97 | 0.66  | 0.59  | 0.67  | 0.60  | 1.18  | 1.65  | 1.47  | 1.42  | 0.91 | 1.71 | 0.95 | 0.79 | 0.72 | -0.14 |
| 285 | T | 1.00 | 0.92 | 0.93 | 1.11 | 0.87  | 0.68  | 0.79  | 0.78  | 1.50  | 2.25  | 1.61  | 1.73  | 2.40 | 5.74 | 2.48 | 2.02 | 0.73 | -0.14 |
| 286 | A | 1.00 | 0.89 | 0.95 | 1.28 | 0.88  | 0.68  | 0.72  | 0.71  | 1.59  | 1.42  | 3.45  | 1.41  | 0.62 | 1.26 | 0.77 | 0.73 | 1.32 | 0.12  |
| 287 |   |      |      |      |      |       |       |       |       |       |       |       |       |      |      |      |      |      |       |

|     |   |      |      |      |      |       |       |       |       |      |       |       |       |       |       |      |      |      |       |
|-----|---|------|------|------|------|-------|-------|-------|-------|------|-------|-------|-------|-------|-------|------|------|------|-------|
| 294 | G | 1.00 | 0.25 | 0.69 | 0.08 | 2.48  | 1.95  | -1.60 | 2.38  | 1.42 | 2.03  | 1.51  | 0.82  | -1.70 | -1.75 | 0.22 | 0.36 | -    |       |
| 295 | A | 1.00 | 0.50 | 0.65 | 0.50 | 1.65  | 1.60  | 0.35  | 1.70  | 1.00 | 1.44  | 1.44  | 0.92  | 0.25  | 0.16  | 0.64 | 0.72 | 3.06 | 0.49  |
| 296 | C | 1.00 | 1.13 | 1.80 | 1.74 | 0.18  | -0.33 | 1.21  | -0.45 | 0.93 | 0.37  | -1.07 | 0.60  | 1.87  | 1.39  | 1.07 | 1.59 | 1.32 | 0.12  |
| 297 | C | 1.00 | 0.91 | 1.07 | 0.93 | 0.55  | 0.58  | 0.13  | 0.56  | 1.18 | 0.18  | 0.48  | 0.62  | 0.40  | 0.35  | 0.95 | 0.76 | 3.62 | 0.56  |
| 298 | A | 1.00 | 1.09 | 1.63 | 1.00 | 0.82  | 0.62  | 0.10  | 0.45  | 0.94 | 0.82  | 0.83  | 0.62  | 0.34  | 0.60  | 0.70 | 0.76 | 3.36 | 0.53  |
| 299 | C | 1.00 | 0.95 | 0.96 | 0.95 | 0.48  | 0.59  | 0.58  | 0.77  | 1.16 | 0.92  | 1.10  | 1.01  | 1.98  | 1.19  | 1.11 | 1.30 | 0.76 | -0.12 |
| 300 | C | 1.00 | 0.62 | 0.89 | 0.98 | 0.67  | 0.51  | 0.81  | 0.81  | 0.74 | 0.55  | 0.61  | 0.60  | 1.28  | 0.92  | 1.23 | 1.46 | 1.40 | 0.15  |
| 301 | T | 1.00 | 1.14 | 1.92 | 1.46 | 0.75  | 0.73  | 1.43  | 0.75  | 1.12 | 0.90  | 0.89  | 0.84  | 1.03  | 0.81  | 0.78 | 0.58 | 0.74 | -0.13 |
| 302 | A | 1.00 | 1.26 | 1.25 | 0.89 | 0.78  | 0.66  | 0.24  | 0.78  | 1.74 | 1.06  | 0.89  | 1.03  | 0.71  | 0.45  | 0.78 | 1.65 | 3.95 | 0.60  |
| 303 | G | 1.00 | 1.13 | 0.82 | 1.33 | 1.75  | 1.30  | 1.05  | 1.27  | 0.75 | 1.23  | 1.71  | 1.41  | 0.77  | 0.78  | 1.07 | 0.97 | 0.67 | -0.17 |
| 304 | A | 1.00 | 1.37 | 1.40 | 2.03 | 1.56  | 2.43  | 1.80  | 1.75  | 0.81 | 1.53  | 2.38  | 2.50  | 1.31  | 2.44  | 2.29 | 0.46 | 0.11 | -0.95 |
| 305 | G | 1.00 | 3.55 | 2.39 | 4.25 | 3.17  | 1.81  | 2.29  | 0.77  | 2.44 | 1.23  | 2.31  | 2.96  | 1.16  | 2.72  | 3.00 | 2.15 | 1.53 | 0.18  |
| 306 | C | 1.00 | 0.95 | 0.89 | 1.00 | 0.39  | 0.59  | 0.79  | 0.78  | 0.50 | 0.46  | 0.34  | 0.51  | 0.53  | 0.54  | 0.66 | 0.30 | 0.56 | -0.25 |
| 307 | C | 1.00 | 0.80 | 1.04 | 0.45 | 0.57  | 0.50  | 0.56  | 0.48  | 0.86 | 0.67  | 0.48  | 0.48  | 0.53  | 0.47  | 0.56 | 0.72 | 2.39 | 0.38  |
| 308 | T | 1.00 | 0.58 | 1.17 | 1.02 | 0.89  | 0.69  | 0.35  | 0.74  | 0.74 | 1.01  | 1.18  | 0.66  | 0.86  | 0.51  | 0.88 | 1.36 | 1.77 | 0.25  |
| 309 | T | 1.00 | 0.88 | 0.95 | 1.53 | 0.87  | 0.82  | 0.55  | 0.76  | 0.60 | 0.63  | 1.33  | 0.99  | 0.62  | 0.49  | 0.63 | 0.82 | 0.79 | -0.10 |
| 310 | G | 1.00 | 1.18 | 0.81 | 0.89 | 0.65  | 0.66  | 0.61  | 0.60  | 1.01 | 0.62  | 0.72  | 0.81  | 0.54  | 0.30  | 0.72 | 0.54 | 1.24 | 0.09  |
| 311 | G | 1.00 | 1.46 | 1.76 | 1.30 | 1.43  | 1.40  | 2.93  | 1.84  | 1.14 | 1.36  | 1.28  | 1.49  | 0.96  | 1.42  | 1.36 | 0.96 | 0.77 | -0.12 |
| 312 | A | 1.00 | 2.34 | 2.51 | 2.29 | 6.08  | 5.94  | 1.72  | 6.11  | 2.88 | 3.27  | 2.36  | 3.48  | 3.29  | 3.32  | 2.67 | 2.48 | 0.62 | -0.20 |
| 313 | T | 1.00 | 0.74 | 1.03 | 1.11 | 0.82  | 1.09  | 0.66  | 0.71  | 1.53 | 1.11  | 1.29  | 1.72  | 1.13  | 0.78  | 1.38 | 1.55 | 1.21 | 0.08  |
| 314 | C | 1.00 | 1.23 | 1.73 | 1.19 | 0.85  | 1.07  | 0.95  | 0.95  | 1.80 | 1.24  | 1.30  | 1.11  | 1.94  | 1.89  | 2.47 | 1.30 | 1.09 | 0.04  |
| 315 | C | 1.00 | 0.56 | 1.31 | 0.70 | 0.60  | 0.42  | 0.49  | 0.47  | 0.73 | 0.88  | 0.57  | 0.40  | 0.80  | 0.39  | 1.19 | 1.42 | 3.26 | 0.51  |
| 316 | A | 1.00 | 1.19 | 1.03 | 1.11 | 0.59  | 0.41  | 0.26  | 0.52  | 1.06 | 0.65  | 0.73  | 0.34  | 0.35  | 0.53  | 0.34 | 0.87 | 7.92 | 0.90  |
| 317 | G | 1.00 | 1.26 | 1.46 | 1.10 | 1.21  | 1.03  | 0.90  | 0.86  | 1.66 | 0.94  | 1.82  | 2.61  | 1.07  | 1.61  | 1.37 | 1.11 | 0.66 | -0.18 |
| 318 | G | 1.00 | 1.34 | 1.72 | 2.27 | 2.30  | 2.75  | 2.38  | 2.53  | 2.79 | 1.86  | 1.79  | 2.22  | 3.90  | 1.92  | 3.19 | 1.83 | 0.59 | -0.23 |
| 319 | A | 1.00 | 1.06 | 1.33 | 1.34 | 1.59  | 1.53  | 0.99  | 1.78  | 1.42 | 2.03  | 1.46  | 1.84  | 1.11  | 0.85  | 1.55 | 1.29 | 0.90 | -0.05 |
| 320 | G | 1.00 | 1.01 | 1.17 | 1.24 | 1.13  | 0.72  | 1.95  | 0.70  | 1.00 | 1.23  | 1.54  | 0.94  | 0.83  | 0.77  | 0.78 | 1.07 | 1.38 | 0.14  |
| 321 | A | 1.00 | 1.18 | 1.08 | 1.40 | 2.55  | 2.58  | 0.58  | 2.47  | 0.33 | 0.78  | 1.03  | 1.01  | 1.33  | 0.82  | 1.08 | 0.88 | 0.22 | -0.66 |
| 322 | A | 1.00 | 1.24 | 1.69 | 1.80 | 1.56  | 1.69  | 0.45  | 0.99  | 0.88 | 0.78  | 1.64  | 1.40  | 1.17  | 0.72  | 1.42 | 0.67 | 0.36 | -0.44 |
| 323 | C | 1.00 | 0.93 | 1.50 | 1.22 | 0.58  | 0.47  | 0.31  | 0.58  | 0.32 | 0.47  | 1.51  | 1.25  | 0.76  | 1.01  | 0.97 | 0.98 | 0.33 | -0.48 |
| 324 | G | 1.00 | 2.50 | 2.04 | 2.11 | 0.31  | 0.66  | 0.85  | 0.56  | 1.53 | 1.57  | 1.07  | 1.49  | 0.79  | 1.46  | 1.43 | 1.07 | 1.39 | 0.14  |
| 325 | G | 1.00 | 0.56 | 0.51 | 0.85 | 1.04  | 1.14  | 0.85  | 0.91  | 1.65 | 1.35  | 1.24  | 1.38  | 1.00  | 1.03  | 1.30 | 1.31 | 1.57 | 0.20  |
| 326 | C | 1.00 | 0.83 | 0.96 | 0.85 | 1.21  | 1.16  | 0.89  | 1.21  | 0.60 | 0.73  | 0.98  | 0.79  | 0.62  | 0.67  | 0.66 | 0.64 | 0.79 | -0.10 |
| 327 | G | 1.00 | 1.11 | 1.68 | 1.47 | 1.00  | 0.94  | 0.88  | 1.21  | 1.00 | 0.85  | 1.10  | 0.94  | 0.76  | 0.92  | 0.94 | 0.88 | 1.24 | 0.09  |
| 328 | G | 1.00 | 0.81 | 1.24 | 0.99 | 1.09  | 1.22  | 0.90  | 1.21  | 0.75 | 1.50  | 1.18  | 1.07  | 0.95  | 1.10  | 1.23 | 0.98 | 0.72 | -0.14 |
| 329 | C | 1.00 | 0.89 | 0.87 | 1.28 | 1.08  | 1.32  | 0.80  | 1.21  | 0.93 | 0.89  | 1.05  | 0.96  | 1.25  | 1.03  | 1.56 | 1.70 | 1.32 | 0.12  |
| 330 | T | 1.00 | 1.73 | 2.46 | 2.27 | 2.48  | 2.77  | 1.51  | 2.49  | 1.52 | 2.01  | 2.47  | 2.61  | 6.26  | 3.12  | 5.78 | 6.33 | 0.59 | -0.23 |
| 331 | G | 1.00 | 0.97 | 0.78 | 0.93 | 0.98  | 1.34  | 0.68  | 1.00  | 1.03 | 0.92  | 1.06  | 0.91  | 0.60  | 0.64  | 1.32 | 1.63 | 3.06 | 0.49  |
| 332 | G | 1.00 | 1.42 | 1.67 | 1.34 | 1.72  | 2.22  | 1.35  | 1.75  | 1.84 | 1.77  | 1.42  | 1.34  | 0.85  | 1.19  | 0.87 | 0.64 | 1.03 | 0.01  |
| 333 | g | 1.00 | 0.64 | 1.20 | 0.88 | 1.02  | 1.30  | 1.02  | 0.94  | 0.58 | 1.05  | 1.25  | 0.91  | 0.54  | 0.55  | 0.72 | 0.33 | 0.39 | -0.40 |
| 334 | t | 1.00 | 1.07 | 1.25 | 1.45 | 1.04  | 1.13  | 0.75  | 0.99  | 1.22 | 0.98  | 1.00  | 0.82  | 0.35  | 0.36  | 0.61 | 0.80 | 3.33 | 0.52  |
| 335 | a | 1.00 | 1.47 | 2.12 | 1.91 | 2.48  | 3.35  | 0.93  | 2.86  | 2.26 | 1.93  | 1.14  | 2.08  | 0.96  | 0.65  | 0.79 | 1.25 | 1.42 | 0.15  |
| 336 | a | 1.00 | 1.02 | 0.84 | 0.98 | 1.71  | 2.30  | 1.05  | 1.76  | 3.34 | 3.24  | 1.87  | 2.70  | 0.89  | 0.74  | 0.65 | 0.73 | 1.01 | 0.01  |
| 337 | g | 1.00 | 1.78 | 2.21 | 2.20 | 5.34  | 5.18  | 7.59  | 3.42  | 8.63 | 14.88 | 13.28 | 11.59 | 1.44  | 1.59  | 1.67 | 1.04 | 0.54 | -0.27 |
| 338 | a | 1.00 | 1.11 | 1.26 | 1.35 | 14.06 | 12.91 | 5.70  | 13.07 | 1.41 | 2.11  | 4.04  | 2.25  | 1.19  | 1.47  | 1.00 | 0.71 | 0.36 | -0.43 |
| 339 | a | 1.00 | 0.82 | 0.96 | 1.13 | 1.04  | 1.10  | 0.59  | 0.62  | 0.99 | 0.36  | 1.54  | 1.27  | 0.61  | 0.88  | 0.84 | 0.76 | 0.98 | -0.01 |
| 340 | c | 1.00 | 1.56 | 1.58 | 1.54 | 0.31  | 0.62  | 0.28  | 0.36  | 1.60 | 1.51  | 1.75  | 1.92  | 1.24  | 1.23  | 1.29 | 1.45 | 0.98 | -0.01 |
| 341 | c | 1.00 | 0.89 | 1.47 | 1.23 | 0.45  | 0.25  | 0.94  | 0.60  | 1.22 | 0.96  | 0.98  | 0.86  | 1.17  | 0.78  | 1.02 | 1.46 | 1.75 | 0.24  |
| 342 | a | 1.00 | 1.07 | 1.20 | 1.00 | 0.56  | 0.55  | 0.33  | 0.59  | 0.96 | 0.67  | 0.57  | 0.76  | 0.54  | 0.49  | 0.81 | 0.78 | 1.82 | 0.26  |
| 343 | a | 1.00 | 1.48 | 1.56 | 1.51 | 1.14  | 1.34  | 0.78  | 1.29  | 1.46 | 1.47  | 1.36  | 1.03  | 1.43  | 1.13  | 1.10 | 1.08 | 1.07 | 0.03  |
| 344 | g | 1.00 | 1.59 | 2.01 | 2.16 | 2.29  | 2.70  | 2.15  | 1.50  | 1.30 | 1.30  | 1.58  | 1.68  | 1.19  | 1.11  | 1.17 | 0.92 | 0.60 | -0.22 |
| 345 | c | 1.00 | 1.80 | 2.43 | 2.33 | 0.95  | 0.84  | 0.89  | 1.48  | 1.29 | 0.92  | 1.35  | 1.10  | 0.95  | 0.77  | 0.99 | 1.07 | 1.32 | 0.12  |
| 346 | c | 1.00 | 1.22 | 1.28 | 2.24 | 0.85  | 0.59  | 0.79  | 0.65  | 0.81 | 0.83  | 1.23  | 0.78  | 0.82  | 0.57  | 0.75 | 0.95 | 1.22 | 0.09  |
| 347 | c | 1.00 | 0.14 | 0.60 | 0.37 | 0.45  | 0.47  | 0.54  | 0.56  | 0.57 | 0.82  | 1.03  | 0.72  | 0.62  | 0.49  | 0.72 | 0.86 | 1.11 | 0.04  |
| 348 | c | 1.00 | 1.32 | 1.29 | 0.91 | 0.62  | 0.57  | 0.42  | 0.61  | 0.63 | 0.78  | 0.58  | 0.79  | 0.59  | 0.50  | 0.82 | 0.82 | 1.11 | 0.04  |
| 349 | t | 1.00 | 1.05 | 1.49 | 1.67 | 0.96  | 0.94  | 0.64  | 0.79  | 0.89 | 1.09  | 0.95  | 0.98  | 0.61  | 0.50  | 0.94 | 1.03 | 1.54 | 0.19  |
| 350 | t | 1.00 | 1.32 | 1.37 | 1.66 | 1.13  | 1.26  | 1.06  | 1.16  | 0.89 | 0.90  | 1.01  | 1.21  | 1.29  | 0.76  | 1.77 | 1.35 | 0.77 | -0.11 |
| 351 | g | 1.00 | 1.28 | 1.28 | 1.36 | 1.60  | 1.65  | 2.15  | 1.20  | 1.40 | 1.79  | 1.41  | 1.81  | 0.65  | 0.97  | 0.89 | 0.75 | 0.88 | -0.05 |
| 352 | t | 1.00 | 1.05 | 1.25 | 1.28 | 2.77  | 3.08  | 1.23  | 3.41  | 1.18 | 1.08  | 1.56  | 1.13  | 1.34  | 1.07  | 1.03 | 1.03 | 0.81 | -0.09 |
| 353 | g | 1.00 | 1.05 | 1.20 | 1.08 | 0.97  | 0.95  | 2.20  | 0.83  | 1.25 | 1.47  | 1.07  | 1.27  | 0.84  | 0.73  | 0.82 | 0.80 | 0.93 | -0.03 |
| 354 | t | 1.00 | 1.04 | 1.32 | 1.17 | 2.27  | 2.20  | 0.63  | 1.94  | 0.83 | 0.94  | 0.96  | 0.81  | 0.76  | 0.54  | 0.88 | 0.90 | 1.21 | 0.08  |
| 355 | g | 1.00 | 1.30 | 1.94 | 1.47 | 1.25  | 0.85  | 1.58  | 0.88  | 1.49 | 1.46  | 1.91  | 1.59  | 0.85  | 0.77  | 0.99 | 1.19 | 1.32 | 0.12  |
| 356 | t | 1.00 | 1.12 | 1.30 | 1.41 | 1.49  | 1.54  | 0.65  | 1.51  | 0.86 | 0.89  | 0.81  | 0.87  | 0.59  | 0.39  | 0.67 | 0.74 | 1.24 | 0.09  |
| 357 | c | 1.00 | 1.06 | 1.24 | 1.18 | 0.70  | 0.83  | 0.94  | 0.71  | 1.32 | 1.17  | 1.37  | 1.06  | 0.84  | 0.81  | 0.93 | 1.15 | 1.71 | 0.23  |
| 358 | c | 1.00 | 1.20 | 1.45 | 1.38 | 0.80  | 0.60  | 0.71  | 0.70  | 1.22 | 1.16  | 1.23  | 1.07  | 0.82  | 0.67  | 0.92 | 1.08 | 1.49 | 0.17  |
| 359 | c | 1.00 | 1.08 | 1.55 | 1.30 | 0.81  | 0.67  | 0.36  | 0.69  | 1.10 | 1.06  | 0.92  | 0.95  | 0.74  | 0.47  | 0.89 | 1.01 | 1.57 | 0.20  |
| 360 | t | 1.00 | 1.08 | 1.19 | 1.28 | 0.58  | 0.44  | 0.42  | 0.48  | 0.51 | 0.66  | 0.73  | 0.69  | 0.46  | 0.26  | 0.61 | 0.59 | 0.97 | -0.01 |
| 361 | t | 1.00 | 1.42 | 1.07 | 1.11 | 0.64  | 0.61  | 0.63  | 0.61  | 1.25 | 1.42  | 1.26  | 1.36  | 0.98  | 0.64  | 1.17 | 0.95 | 0.89 | -0.05 |
| 362 | t | 1.00 | 1.30 | 1.62 | 1.37 | 0.96  | 1.00  | 1.09  | 0.90  | 3.47 | 3.60  | 4.03  | 3.95  | 1.37  | 1.22  | 1.53 | 1.49 | 0.95 | -0.02 |
|     |   |      |      |      |      |       |       |       |       |      |       |       |       |       |       |      |      |      |       |

|     |   |      |      |      |      |      |      |      |      |      |      |      |      |      |      |      |      |      |       |
|-----|---|------|------|------|------|------|------|------|------|------|------|------|------|------|------|------|------|------|-------|
| 370 | c | 1.00 | 1.02 | 0.89 | 0.86 | 0.90 | 0.92 | 0.65 | 0.97 | 0.68 | 0.81 | 0.64 | 0.74 | 0.64 | 0.67 | 0.76 | 0.69 | 0.99 | 0.00  |
| 371 | c | 1.00 | 1.29 | 1.12 | 1.23 | 0.90 | 0.98 | 0.85 | 0.90 | 0.91 | 1.07 | 1.04 | 0.99 | 1.21 | 1.01 | 1.16 | 1.05 | 0.80 | -0.10 |
| 372 | t | 1.00 | 1.09 | 1.05 | 1.07 | 0.64 | 0.65 | 0.69 | 0.68 | 0.67 | 0.74 | 0.65 | 0.71 | 0.60 | 0.51 | 0.76 | 0.72 | 1.13 | 0.05  |
| 373 | c | 1.00 | 1.17 | 1.26 | 1.17 | 0.86 | 0.86 | 0.75 | 0.87 | 1.43 | 1.55 | 1.85 | 2.15 | 0.81 | 0.89 | 0.90 | 1.08 | 0.89 | -0.05 |
| 374 | t | 1.00 | 1.05 | 1.26 | 1.24 | 0.97 | 1.02 | 0.76 | 1.00 | 1.55 | 1.52 | 1.39 | 1.27 | 0.94 | 1.08 | 0.88 | 1.01 | 1.31 | 0.12  |
| 375 | g | 1.00 | 1.09 | 1.06 | 1.01 | 0.59 | 0.58 | 0.63 | 0.62 | 0.59 | 0.56 | 0.61 | 0.56 | 0.50 | 0.40 | 0.65 | 0.66 | 1.42 | 0.15  |
| 376 | g | 1.00 | 1.26 | 1.53 | 1.38 | 1.28 | 1.48 | 0.90 | 1.33 | 1.25 | 1.27 | 1.11 | 1.05 | 0.98 | 1.37 | 0.99 | 1.22 | 1.48 | 0.17  |
| 377 | t | 1.00 | 1.21 | 1.30 | 1.50 | 1.55 | 1.50 | 1.09 | 1.50 | 0.94 | 1.18 | 1.21 | 1.14 | 1.32 | 1.35 | 1.19 | 1.27 | 0.79 | -0.10 |
| 378 | c | 1.00 | 1.13 | 1.28 | 1.29 | 1.07 | 1.05 | 0.81 | 1.08 | 0.98 | 1.02 | 1.01 | 0.99 | 1.41 | 1.10 | 1.33 | 1.45 | 1.02 | 0.01  |
| 379 | a | 1.00 | 1.07 | 1.64 | 1.30 | 0.80 | 0.62 | 0.52 | 0.72 | 1.62 | 0.85 | 0.92 | 0.85 | 1.04 | 0.84 | 1.05 | 1.22 | 2.22 | 0.35  |
| 380 | g | 1.00 | 1.10 | 1.34 | 1.37 | 0.91 | 0.95 | 0.67 | 0.97 | 1.00 | 1.31 | 1.43 | 1.30 | 2.03 | 1.79 | 2.28 | 2.27 | 0.85 | -0.07 |
| 381 | a | 1.00 | 1.15 | 1.20 | 1.25 | 1.65 | 1.86 | 1.28 | 1.90 | 0.72 | 0.98 | 0.97 | 0.90 | 0.86 | 0.76 | 1.15 | 1.07 | 1.00 | 0.00  |
| 382 | g | 1.00 | 1.07 | 1.21 | 1.12 | 0.90 | 0.96 | 0.70 | 0.91 | 1.02 | 1.11 | 1.10 | 1.18 | 0.68 | 0.60 | 0.79 | 0.88 | 1.13 | 0.05  |
| 383 | a | 1.00 | 1.04 | 1.23 | 1.20 | 1.29 | 1.38 | 1.07 | 1.45 | 0.85 | 1.00 | 0.90 | 0.91 | 0.83 | 0.74 | 0.77 | 0.84 | 0.94 | -0.03 |
| 384 | t | 1.00 | 1.18 | 1.26 | 1.35 | 0.95 | 0.93 | 0.80 | 0.92 | 0.91 | 0.95 | 1.01 | 1.02 | 0.79 | 0.78 | 0.88 | 0.95 | 1.07 | 0.03  |
| 385 | c | 1.00 | 1.05 | 1.20 | 1.13 | 0.81 | 0.80 | 0.79 | 0.81 | 0.80 | 0.79 | 0.93 | 0.85 | 0.95 | 1.07 | 1.08 | 1.19 | 1.17 | 0.07  |
| 386 | c | 1.00 | 1.03 | 1.23 | 1.15 | 0.85 | 0.86 | 0.78 | 0.90 | 1.10 | 0.87 | 0.83 | 0.91 | 1.21 | 1.11 | 1.23 | 1.39 | 1.38 | 0.14  |
| 387 | c | 1.00 | 1.07 | 1.23 | 1.20 | 0.88 | 0.91 | 0.74 | 0.91 | 0.91 | 0.87 | 0.77 | 0.81 | 2.10 | 1.47 | 2.17 | 2.23 | 1.19 | 0.08  |
| 388 | c | 1.00 | 1.07 | 1.12 | 1.13 | 0.84 | 0.93 | 0.80 | 0.94 | 0.91 | 0.86 | 0.82 | 0.79 | 2.23 | 1.43 | 2.33 | 2.21 | 1.14 | 0.06  |
| 389 | a | 1.00 | 1.09 | 1.15 | 0.94 | 0.71 | 0.70 | 0.59 | 0.80 | 1.35 | 0.63 | 0.67 | 0.66 | 0.58 | 0.46 | 0.63 | 0.61 | 2.16 | 0.33  |
| 390 | a | 1.00 | 1.11 | 1.05 | 1.13 | 0.78 | 0.83 | 0.89 | 0.94 | 0.65 | 0.94 | 0.91 | 0.91 | 1.03 | 1.14 | 1.24 | 1.07 | 0.74 | -0.13 |
| 391 | c | 1.00 | 1.11 | 0.91 | 0.99 | 0.71 | 0.79 | 0.93 | 0.81 | 0.80 | 0.89 | 0.83 | 0.80 | 1.66 | 1.40 | 1.82 | 1.44 | 0.87 | -0.06 |
| 392 | a | 1.00 | 1.01 | 1.04 | 0.89 | 0.62 | 0.57 | 0.50 | 0.69 | 1.10 | 0.59 | 0.59 | 0.59 | 0.48 | 0.39 | 0.54 | 0.59 | 2.28 | 0.36  |
| 393 | g | 1.00 | 1.30 | 1.12 | 1.30 | 0.88 | 1.16 | 1.13 | 1.19 | 1.08 | 1.69 | 1.57 | 1.56 | 0.81 | 1.00 | 0.89 | 0.93 | 0.79 | -0.10 |
| 394 | c | 1.00 | 1.18 | 1.09 | 1.18 | 1.96 | 2.20 | 2.10 | 2.37 | 0.86 | 1.15 | 1.07 | 1.02 | 0.68 | 0.73 | 0.75 | 0.90 | 1.12 | 0.05  |
| 395 | c | 1.00 | 1.09 | 1.20 | 1.15 | 0.94 | 1.02 | 0.83 | 0.93 | 0.93 | 0.96 | 1.09 | 0.98 | 0.70 | 0.38 | 0.73 | 0.86 | 1.17 | 0.07  |
| 396 | c | 1.00 | 1.10 | 1.07 | 1.05 | 0.81 | 0.92 | 0.76 | 0.87 | 1.00 | 0.90 | 0.90 | 0.88 | 0.81 | 0.62 | 0.84 | 0.89 | 1.25 | 0.10  |
| 397 | t | 1.00 | 1.11 | 1.06 | 1.10 | 0.83 | 0.92 | 0.78 | 0.87 | 0.84 | 0.92 | 0.95 | 0.90 | 0.75 | 0.46 | 0.77 | 0.85 | 1.06 | 0.03  |
| 398 | t | 1.00 | 1.08 | 0.89 | 0.97 | 0.75 | 0.85 | 0.82 | 0.81 | 0.75 | 0.85 | 0.88 | 0.81 | 0.95 | 0.74 | 0.97 | 0.99 | 0.95 | -0.02 |
| 399 | c | 1.00 | 1.06 | 0.92 | 0.93 | 0.78 | 0.88 | 0.86 | 0.80 | 0.83 | 0.86 | 0.86 | 0.84 | 1.27 | 0.94 | 1.20 | 1.13 | 0.86 | -0.06 |
| 400 | t | 1.00 | 1.06 | 0.99 | 1.04 | 0.83 | 0.94 | 0.81 | 0.93 | 0.98 | 1.00 | 0.96 | 0.99 | 0.79 | 0.64 | 0.85 | 0.87 | 1.10 | 0.04  |
| 401 | t | 1.00 | 1.04 | 0.89 | 0.91 | 0.79 | 0.84 | 0.82 | 0.82 | 0.79 | 0.87 | 0.94 | 0.93 | 0.84 | 0.80 | 0.90 | 0.87 | 0.88 | -0.05 |
| 402 | c | 1.00 | 1.19 | 0.96 | 1.06 | 0.80 | 0.89 | 0.89 | 0.89 | 1.17 | 1.03 | 1.00 | 1.02 | 1.48 | 1.62 | 1.39 | 1.36 | 1.05 | 0.02  |
| 403 | t | 1.00 | 1.09 | 0.99 | 0.99 | 0.77 | 0.82 | 0.72 | 0.83 | 0.94 | 0.86 | 0.92 | 0.91 | 1.20 | 1.20 | 1.13 | 1.14 | 0.99 | 0.00  |
| 404 | g | 1.00 | 1.08 | 0.94 | 0.88 | 0.85 | 1.03 | 1.06 | 0.99 | 1.18 | 1.14 | 1.02 | 1.04 | 0.82 | 0.90 | 0.81 | 0.89 | 1.23 | 0.09  |
| 405 | t | 1.00 | 1.11 | 1.12 | 1.10 | 1.99 | 2.07 | 1.97 | 1.83 | 1.16 | 1.00 | 0.95 | 0.97 | 0.83 | 0.73 | 0.77 | 0.93 | 1.33 | 0.12  |
| 406 | a | 1.00 | 1.02 | 0.96 | 0.81 | 0.68 | 0.60 | 0.61 | 0.74 | 1.55 | 0.89 | 0.82 | 0.86 | 0.64 | 0.45 | 0.60 | 0.90 | 2.51 | 0.40  |
| 407 | t | 1.00 | 1.12 | 1.08 | 1.14 | 0.79 | 0.88 | 0.80 | 0.89 | 1.93 | 2.32 | 2.25 | 2.26 | 1.06 | 1.17 | 1.08 | 1.16 | 0.94 | -0.03 |
| 408 | c | 1.00 | 1.11 | 1.01 | 0.91 | 0.73 | 0.79 | 0.78 | 0.88 | 1.04 | 1.04 | 1.06 | 1.03 | 1.96 | 2.42 | 1.96 | 2.02 | 1.04 | 0.02  |
| 409 | t | 1.00 | 0.99 | 0.97 | 0.93 | 0.74 | 0.76 | 0.58 | 0.69 | 0.74 | 0.76 | 0.79 | 0.84 | 0.72 | 0.58 | 0.69 | 0.80 | 0.99 | 0.00  |
| 410 | c | 1.00 | 0.95 | 0.93 | 0.89 | 0.67 | 0.65 | 0.70 | 0.72 | 0.88 | 0.82 | 0.84 | 0.83 | 2.21 | 2.63 | 1.94 | 1.98 | 0.94 | -0.02 |
| 411 | t | 1.00 | 0.90 | 0.89 | 0.90 | 0.69 | 0.63 | 0.75 | 0.69 | 0.82 | 0.80 | 0.79 | 0.75 | 2.51 | 2.85 | 2.13 | 2.00 | 0.86 | -0.06 |
| 412 | t | 1.00 | 0.91 | 0.72 | 0.80 | 0.65 | 0.63 | 0.66 | 0.67 | 0.73 | 0.79 | 0.76 | 0.83 | 1.24 | 1.60 | 1.19 | 1.14 | 0.81 | -0.09 |
| 413 | t | 1.00 | 0.94 | 0.87 | 0.92 | 0.73 | 0.75 | 0.77 | 0.80 | 0.96 | 0.97 | 1.03 | 1.06 | 0.92 | 1.18 | 0.86 | 0.93 | 0.91 | -0.04 |
| 414 | c | 1.00 | 1.01 | 0.85 | 0.82 | 0.75 | 0.69 | 0.79 | 0.74 | 1.12 | 0.99 | 1.01 | 1.09 | 1.28 | 1.78 | 1.50 | 1.47 | 1.18 | 0.07  |
| 415 | t | 1.00 | 0.93 | 0.80 | 0.81 | 0.77 | 0.88 | 0.76 | 0.85 | 1.02 | 0.86 | 0.77 | 0.98 | 2.00 | 2.88 | 1.73 | 1.45 | 0.75 | -0.12 |
| 416 | g | 1.00 | 0.87 | 0.50 | 0.61 | 0.77 | 0.87 | 1.14 | 0.89 | 1.02 | 1.09 | 0.98 | 1.13 | 0.78 | 1.15 | 0.71 | 0.65 | 0.76 | -0.12 |
| 417 | t | 1.00 | 0.99 | 0.91 | 0.86 | 6.47 | 6.59 | 6.03 | 6.29 | 1.82 | 1.95 | 1.90 | 1.99 | 1.62 | 2.03 | 1.39 | 1.22 | 0.68 | -0.16 |
| 418 | t | 1.00 | 0.88 | 0.89 | 0.82 | 0.65 | 0.60 | 0.68 | 0.66 | 1.70 | 1.69 | 1.64 | 1.83 | 1.21 | 1.51 | 1.05 | 1.01 | 0.78 | -0.11 |
| 419 | g | 1.00 | 0.81 | 0.72 | 0.64 | 0.63 | 0.71 | 1.30 | 0.78 | 2.22 | 2.54 | 2.10 | 2.25 | 1.18 | 1.62 | 1.13 | 1.08 | 0.90 | -0.04 |
| 420 | t | 1.00 | 0.85 | 0.85 | 0.95 | 3.47 | 3.66 | 4.59 | 3.72 | 0.82 | 0.83 | 0.78 | 0.86 | 0.96 | 1.15 | 0.87 | 0.86 | 0.85 | -0.07 |
| 421 | g | 1.00 | 0.79 | 0.71 | 0.78 | 0.92 | 0.88 | 1.50 | 0.92 | 1.12 | 1.28 | 1.19 | 1.17 | 0.64 | 0.71 | 0.62 | 0.60 | 0.91 | -0.04 |
| 422 | t | 1.00 | 0.83 | 0.96 | 0.92 | 3.50 | 3.15 | 4.33 | 3.30 | 0.92 | 0.93 | 0.88 | 0.96 | 0.96 | 1.20 | 1.02 | 0.88 | 0.88 | -0.06 |
| 423 | t | 1.00 | 0.89 | 0.69 | 0.86 | 0.56 | 0.49 | 0.62 | 0.53 | 1.10 | 1.19 | 1.11 | 1.21 | 1.05 | 1.23 | 0.96 | 0.92 | 0.80 | -0.10 |
| 424 | g | 1.00 | 0.84 | 0.51 | 0.63 | 0.43 | 0.42 | 0.84 | 0.47 | 0.66 | 0.73 | 0.65 | 0.72 | 0.79 | 1.00 | 0.72 | 0.67 | 0.76 | -0.12 |
| 425 | g | 1.00 | 0.80 | 0.66 | 0.76 | 1.03 | 0.99 | 1.65 | 0.97 | 0.75 | 0.76 | 0.68 | 0.71 | 0.78 | 0.99 | 0.72 | 0.65 | 0.88 | -0.05 |
| 426 | g | 1.00 | 0.86 | 0.85 | 1.00 | 2.70 | 2.63 | 3.11 | 2.51 | 1.81 | 1.91 | 1.59 | 1.71 | 1.64 | 2.16 | 1.50 | 1.41 | 0.90 | -0.04 |
| 427 | t | 1.00 | 0.90 | 0.87 | 1.03 | 1.03 | 0.91 | 1.03 | 0.89 | 0.49 | 0.58 | 0.59 | 0.58 | 1.08 | 1.22 | 0.96 | 0.86 | 0.67 | -0.17 |
| 428 | g | 1.00 | 0.80 | 0.51 | 0.59 | 0.25 | 0.22 | 0.49 | 0.30 | 0.40 | 0.37 | 0.33 | 0.34 | 0.76 | 0.86 | 0.75 | 0.63 | 0.99 | -0.01 |
| 429 | a | 1.00 | 0.82 | 0.58 | 0.72 | 2.03 | 1.85 | 2.10 | 1.80 | 0.58 | 0.54 | 0.62 | 0.66 | 1.00 | 1.08 | 0.91 | 0.81 | 0.70 | -0.16 |
| 430 | t | 1.00 | 0.85 | 0.76 | 0.78 | 0.63 | 0.51 | 0.68 | 0.62 | 1.52 | 1.63 | 1.69 | 2.06 | 1.03 | 1.08 | 0.89 | 0.81 | 0.58 | -0.24 |
| 431 | t | 1.00 | 0.91 | 0.87 | 0.87 | 0.61 | 0.50 | 0.44 | 0.45 | 0.78 | 0.71 | 0.74 | 0.89 | 1.15 | 1.12 | 1.04 | 1.00 | 0.76 | -0.12 |
| 432 | g | 1.00 | 1.07 | 1.03 | 0.94 | 1.55 | 1.39 | 1.17 | 1.38 | 1.36 | 1.22 | 1.27 | 1.22 | 0.53 | 0.93 | 0.67 | 0.64 | 1.34 | 0.13  |
| 433 | t | 1.00 | 1.01 | 1.01 | 1.14 | 4.11 | 4.63 | 3.64 | 3.41 | 0.93 | 0.80 | 0.76 | 0.83 | 0.74 | 1.32 | 0.60 | 0.57 | 0.87 | -0.06 |
| 434 | t | 1.00 | 0.85 | 0.86 | 0.94 | 0.70 | 0.55 | 0.61 | 0.49 | 1.34 | 1.06 | 1.28 | 1.23 | 0.94 | 1.30 | 0.84 | 0.98 | 1.13 | 0.05  |
| 435 | g | 1.00 | 1.05 | 1.16 | 0.95 | 0.68 | 0.42 | 0.43 | 0.68 | 1.02 | 0.82 | 0.84 | 0.81 | 1.14 | 1.62 | 1.09 | 1.11 | 1.22 | 0.09  |
| 436 | g | 1.00 | 0.78 | 1.07 | 0.91 | 1.09 | 1.16 | 1.12 | 0.96 | 0.62 | 0.47 | 0.64 | 0.53 | 1.15 | 1.17 | 1.01 | 0.95 | 0.96 | -0.02 |
| 437 | a | 1.00 | 0.98 | 0.93 | 1.08 | 0.89 | 0.81 | 0.85 | 0.72 | 0.59 | 0.57 | 0.60 | 0.58 | 0.71 | 0.76 | 0.72 | 0.76 | 1.09 | 0.04  |
| 438 | g | 1.00 | 1.02 | 0.99 | 0.95 | 0.69 | 0.57 | 0.63 | 0.61 | 0.81 | 0.74 | 0.78 | 0.77 | 0.92 | 1.09 | 0.92 | 0.85 | 0.97 |       |

|     |   |      |      |      |      |      |      |      |      |      |      |      |      |      |      |      |      |      |       |
|-----|---|------|------|------|------|------|------|------|------|------|------|------|------|------|------|------|------|------|-------|
| 446 | t | 1.00 | 0.90 | 1.01 | 1.06 | 0.64 | 0.65 | 0.59 | 0.62 | 2.75 | 3.07 | 2.73 | 2.89 | 0.61 | 0.89 | 0.58 | 0.53 | 0.84 | -0.08 |
| 447 | a | 1.00 | 1.23 | 1.34 | 1.29 | 0.66 | 0.43 | 0.58 | 0.62 | 1.65 | 0.60 | 0.89 | 0.84 | 0.66 | 0.59 | 0.68 | 0.91 | 2.71 | 0.43  |
| 448 | g | 1.00 | 0.86 | 0.83 | 0.66 | 0.74 | 0.77 | 0.69 | 0.83 | 1.89 | 2.09 | 2.14 | 2.14 | 0.79 | 1.32 | 0.60 | 0.70 | 0.78 | -0.11 |
| 449 | t | 1.00 | 0.88 | 0.94 | 0.92 | 3.64 | 3.56 | 3.50 | 3.52 | 0.80 | 0.87 | 0.91 | 0.89 | 1.19 | 1.69 | 1.08 | 1.02 | 0.77 | -0.11 |
| 450 | t | 1.00 | 0.91 | 0.90 | 1.07 | 0.66 | 0.60 | 0.59 | 0.62 | 0.82 | 0.61 | 0.80 | 0.68 | 1.37 | 1.58 | 1.25 | 1.25 | 1.10 | 0.04  |
| 451 | g | 1.00 | 0.98 | 1.11 | 1.13 | 0.72 | 0.55 | 0.64 | 0.59 | 0.95 | 0.80 | 0.88 | 0.85 | 1.13 | 1.27 | 1.10 | 1.03 | 1.01 | 0.00  |
| 452 | a | 1.00 | 0.88 | 0.79 | 0.96 | 1.19 | 1.11 | 1.13 | 1.24 | 0.77 | 0.65 | 0.88 | 0.62 | 0.91 | 1.44 | 1.01 | 0.95 | 1.29 | 0.11  |
| 453 | g | 1.00 | 0.97 | 0.95 | 0.96 | 0.57 | 0.51 | 0.62 | 0.59 | 1.27 | 0.93 | 1.13 | 1.30 | 1.45 | 1.38 | 1.18 | 1.20 | 0.81 | -0.09 |
| 454 | g | 1.00 | 0.83 | 0.96 | 0.76 | 1.19 | 1.18 | 1.14 | 1.19 | 1.03 | 0.98 | 1.13 | 1.12 | 0.79 | 1.11 | 0.79 | 0.84 | 0.98 | -0.01 |
| 455 | a | 1.00 | 1.06 | 1.15 | 1.06 | 1.35 | 1.42 | 1.38 | 1.55 | 0.63 | 0.77 | 0.68 | 0.70 | 0.67 | 0.70 | 0.64 | 0.70 | 0.93 | -0.03 |
| 456 | a | 1.00 | 0.86 | 0.95 | 0.90 | 0.73 | 0.69 | 0.72 | 0.80 | 1.01 | 0.96 | 1.01 | 1.06 | 0.62 | 0.83 | 0.73 | 0.75 | 1.15 | 0.06  |
| 457 | a | 1.00 | 0.88 | 1.03 | 0.88 | 0.52 | 0.56 | 0.67 | 0.66 | 1.55 | 1.51 | 1.71 | 1.60 | 0.74 | 1.06 | 0.73 | 0.72 | 0.95 | -0.02 |
| 458 | c | 1.00 | 0.88 | 1.08 | 0.95 | 0.61 | 0.59 | 0.65 | 0.63 | 1.47 | 1.60 | 1.62 | 1.64 | 0.86 | 1.11 | 0.79 | 0.87 | 0.91 | -0.04 |
| 459 | c | 1.00 | 0.95 | 0.89 | 0.89 | 0.66 | 0.57 | 0.61 | 0.61 | 1.25 | 0.77 | 0.88 | 0.89 | 1.36 | 1.25 | 1.24 | 1.21 | 1.25 | 0.10  |
| 460 | t | 1.00 | 1.02 | 1.05 | 0.96 | 0.69 | 0.70 | 0.83 | 0.76 | 0.67 | 0.74 | 0.79 | 0.64 | 1.98 | 1.47 | 1.69 | 1.63 | 0.87 | -0.06 |
| 461 | g | 1.00 | 0.98 | 1.14 | 0.89 | 0.78 | 0.98 | 0.92 | 1.06 | 0.95 | 1.14 | 1.00 | 0.99 | 2.97 | 1.96 | 2.56 | 2.29 | 0.74 | -0.13 |
| 462 | a | 1.00 | 0.94 | 0.89 | 0.82 | 4.47 | 4.86 | 4.75 | 4.63 | 0.94 | 0.96 | 1.03 | 1.01 | 0.58 | 1.19 | 0.77 | 0.87 | 1.39 | 0.14  |
| 463 | c | 1.00 | 0.92 | 0.97 | 0.86 | 0.52 | 0.55 | 0.62 | 0.58 | 1.56 | 1.66 | 1.78 | 1.77 | 0.82 | 1.04 | 0.82 | 0.93 | 1.00 | 0.00  |
| 464 | t | 1.00 | 0.86 | 0.94 | 0.97 | 0.56 | 0.54 | 0.62 | 0.64 | 0.87 | 0.76 | 0.87 | 0.82 | 2.17 | 1.56 | 2.14 | 2.12 | 1.05 | 0.02  |
| 465 | g | 1.00 | 1.02 | 1.14 | 0.94 | 0.59 | 0.61 | 0.66 | 0.72 | 0.76 | 0.76 | 0.69 | 0.70 | 0.99 | 0.97 | 1.01 | 0.94 | 1.03 | 0.01  |
| 466 | g | 1.00 | 1.02 | 1.08 | 1.07 | 0.82 | 0.90 | 0.90 | 0.87 | 0.70 | 0.59 | 0.76 | 0.63 | 0.84 | 1.07 | 0.94 | 1.00 | 1.32 | 0.12  |
| 467 | c | 1.00 | 0.93 | 1.03 | 1.11 | 0.88 | 1.16 | 1.05 | 1.09 | 0.62 | 0.68 | 0.72 | 0.67 | 0.80 | 1.25 | 1.06 | 1.15 | 1.34 | 0.13  |
| 468 | c | 1.00 | 0.90 | 0.98 | 0.98 | 0.39 | 0.42 | 0.51 | 0.44 | 0.53 | 0.62 | 0.62 | 0.56 | 1.52 | 1.22 | 1.50 | 1.57 | 0.98 | -0.01 |
| 469 | t | 1.00 | 0.92 | 1.01 | 1.10 | 0.47 | 0.52 | 0.58 | 0.50 | 0.59 | 0.66 | 0.66 | 0.63 | 1.22 | 0.95 | 1.24 | 1.26 | 0.97 | -0.01 |
| 470 | c | 1.00 | 0.96 | 1.03 | 0.99 | 0.60 | 0.73 | 0.73 | 0.69 | 0.66 | 0.74 | 0.64 | 0.66 | 1.35 | 1.06 | 1.33 | 1.26 | 0.94 | -0.03 |
| 471 | a | 1.00 | 0.90 | 0.98 | 1.07 | 0.52 | 0.55 | 0.56 | 0.56 | 1.05 | 0.70 | 0.74 | 0.70 | 0.55 | 0.46 | 0.57 | 0.64 | 1.76 | 0.24  |
| 472 | t | 1.00 | 0.94 | 0.96 | 1.02 | 0.54 | 0.63 | 0.72 | 0.70 | 2.37 | 3.15 | 3.06 | 3.06 | 0.72 | 0.85 | 0.79 | 0.75 | 0.80 | -0.09 |
| 473 | t | 1.00 | 1.03 | 1.02 | 0.98 | 0.52 | 0.67 | 0.73 | 0.67 | 2.02 | 2.70 | 2.39 | 2.36 | 1.43 | 1.77 | 1.32 | 1.27 | 0.76 | -0.12 |
| 474 | t | 1.00 | 1.10 | 0.88 | 1.09 | 0.48 | 0.66 | 0.61 | 0.71 | 1.72 | 2.15 | 2.03 | 1.95 | 1.00 | 1.15 | 0.92 | 1.02 | 0.90 | -0.05 |
| 475 | c | 1.00 | 1.10 | 1.11 | 1.10 | 0.54 | 0.50 | 0.58 | 0.63 | 1.27 | 1.32 | 1.32 | 1.27 | 1.55 | 1.55 | 1.34 | 1.34 | 0.87 | -0.06 |
| 476 | a | 1.00 | 0.85 | 0.94 | 1.02 | 0.53 | 0.48 | 0.45 | 0.48 | 1.39 | 0.72 | 0.80 | 0.84 | 0.62 | 0.44 | 0.60 | 0.65 | 1.76 | 0.25  |
| 477 | c | 1.00 | 0.87 | 0.91 | 0.86 | 0.51 | 0.57 | 0.69 | 0.60 | 2.24 | 3.79 | 3.28 | 2.94 | 1.69 | 1.69 | 1.37 | 1.35 | 0.61 | -0.22 |
| 478 | c | 1.00 | 0.98 | 0.85 | 0.99 | 0.52 | 0.80 | 0.69 | 0.78 | 0.97 | 1.23 | 1.12 | 1.01 | 1.21 | 1.24 | 1.08 | 1.24 | 0.99 | -0.01 |
| 479 | a | 1.00 | 0.96 | 0.97 | 0.90 | 0.52 | 0.56 | 0.54 | 0.58 | 1.10 | 0.52 | 0.56 | 0.59 | 0.62 | 0.58 | 0.61 | 0.68 | 2.03 | 0.31  |
| 480 | c | 1.00 | 0.95 | 0.83 | 1.01 | 0.53 | 0.54 | 0.53 | 0.63 | 0.79 | 1.53 | 1.33 | 1.09 | 1.67 | 1.39 | 1.41 | 1.39 | 0.60 | -0.22 |
| 481 | a | 1.00 | 1.03 | 1.02 | 1.00 | 0.57 | 0.48 | 0.50 | 0.57 | 1.31 | 0.63 | 0.59 | 0.66 | 0.58 | 0.45 | 0.59 | 0.66 | 2.27 | 0.36  |
| 482 | a | 1.00 | 0.87 | 1.06 | 0.83 | 0.47 | 0.72 | 0.87 | 0.86 | 0.87 | 1.69 | 1.64 | 1.52 | 3.14 | 3.54 | 3.20 | 2.94 | 0.54 | -0.27 |
| 483 | g | 1.00 | 0.83 | 0.96 | 0.90 | 0.66 | 1.09 | 0.92 | 1.09 | 1.96 | 3.43 | 3.07 | 3.84 | 2.43 | 2.47 | 2.23 | 2.04 | 0.43 | -0.37 |
| 484 | a | 1.00 | 1.14 | 1.06 | 1.12 | 3.02 | 3.53 | 3.50 | 4.28 | 0.88 | 1.12 | 0.91 | 0.93 | 2.19 | 2.26 | 2.09 | 2.03 | 0.88 | -0.06 |
| 485 | g | 1.00 | 1.12 | 1.13 | 0.90 | 0.47 | 0.69 | 0.70 | 0.75 | 1.19 | 1.70 | 1.33 | 1.41 | 1.58 | 1.47 | 1.64 | 1.51 | 0.80 | -0.10 |
| 486 | g | 1.00 | 0.98 | 0.93 | 1.01 | 1.00 | 1.21 | 1.08 | 1.12 | 0.70 | 1.16 | 0.92 | 0.87 | 1.20 | 0.95 | 1.22 | 1.23 | 0.82 | -0.09 |
| 487 | t | 1.00 | 1.11 | 1.19 | 1.10 | 1.16 | 1.39 | 1.42 | 1.52 | 0.64 | 0.92 | 0.79 | 0.83 | 0.75 | 0.49 | 0.81 | 0.74 | 0.77 | -0.12 |
| 488 | t | 1.00 | 1.06 | 1.03 | 0.87 | 0.56 | 0.71 | 0.76 | 0.78 | 0.80 | 1.18 | 0.90 | 0.92 | 1.22 | 1.10 | 1.24 | 1.12 | 0.80 | -0.10 |
| 489 | a | 1.00 | 0.96 | 1.16 | 0.89 | 0.58 | 0.61 | 0.68 | 0.66 | 1.42 | 1.15 | 1.16 | 1.09 | 0.92 | 0.73 | 0.89 | 1.02 | 1.43 | 0.16  |
| 490 | a | 1.00 | 0.98 | 0.95 | 0.73 | 0.56 | 0.70 | 0.70 | 0.76 | 2.84 | 4.20 | 4.09 | 4.70 | 0.78 | 0.80 | 0.79 | 0.75 | 0.58 | -0.23 |
| 491 | c | 1.00 | 1.27 | 1.13 | 0.96 | 0.58 | 0.65 | 0.62 | 0.75 | 3.83 | 6.64 | 5.27 | 5.56 | 1.28 | 1.25 | 1.05 | 0.99 | 0.53 | -0.27 |
| 492 | t | 1.00 | 1.02 | 1.02 | 1.00 | 0.55 | 0.58 | 0.69 | 0.55 | 0.93 | 1.41 | 1.20 | 1.14 | 1.01 | 0.67 | 1.00 | 1.05 | 0.85 | -0.07 |
| 493 | c | 1.00 | 1.10 | 1.12 | 0.97 | 0.59 | 0.64 | 0.68 | 0.71 | 0.49 | 0.73 | 0.64 | 0.61 | 2.40 | 2.41 | 2.36 | 2.29 | 0.77 | -0.12 |
| 494 | c | 1.00 | 1.03 | 0.97 | 0.95 | 0.57 | 0.71 | 0.63 | 0.66 | 0.59 | 0.73 | 0.64 | 0.66 | 1.35 | 1.15 | 1.30 | 1.20 | 0.79 | -0.10 |
| 495 | t | 1.00 | 1.00 | 1.00 | 0.91 | 0.44 | 0.48 | 0.50 | 0.47 | 0.40 | 0.57 | 0.54 | 0.54 | 2.27 | 2.33 | 1.92 | 1.65 | 0.53 | -0.28 |
| 496 | t | 1.00 | 1.15 | 1.00 | 1.02 | 0.75 | 0.79 | 0.78 | 0.82 | 0.57 | 0.82 | 0.79 | 0.77 | 3.87 | 3.77 | 3.48 | 2.89 | 0.55 | -0.26 |
| 497 | g | 1.00 | 1.15 | 1.02 | 1.01 | 0.91 | 1.02 | 1.08 | 1.30 | 0.99 | 1.32 | 1.01 | 1.16 | 1.82 | 1.56 | 1.79 | 1.47 | 0.69 | -0.16 |
| 498 | g | 1.00 | 1.13 | 0.97 | 1.24 | 1.65 | 1.79 | 1.96 | 1.98 | 1.16 | 1.66 | 1.44 | 1.85 | 1.29 | 1.21 | 1.28 | 1.21 | 0.59 | -0.23 |
| 499 | a | 1.00 | 1.16 | 0.97 | 0.97 | 2.41 | 3.51 | 3.53 | 3.44 | 0.80 | 0.94 | 0.82 | 0.81 | 0.99 | 0.86 | 0.90 | 0.83 | 0.83 | -0.08 |
| 500 | a | 1.00 | 0.99 | 0.85 | 0.93 | 0.95 | 0.87 | 1.07 | 1.11 | 0.68 | 0.80 | 1.23 | 1.69 | 1.10 | 1.23 | 1.36 | 1.31 | 0.48 | -0.32 |
| 501 | a | 1.00 | 1.29 | 1.10 | 1.05 | 0.50 | 0.63 | 0.54 | 0.45 | 2.61 | 3.38 | 2.50 | 3.27 | 1.65 | 1.84 | 1.03 | 0.95 | 0.46 | -0.34 |
| 502 | t | 1.00 | 1.25 | 1.15 | 1.13 | 1.03 | 0.95 | 0.92 | 0.94 | 2.96 | 3.92 | 3.91 | 3.70 | 0.96 | 0.70 | 0.91 | 0.89 | 0.74 | -0.13 |
| 503 | a | 1.00 | 1.12 | 1.06 | 1.10 | 0.86 | 0.66 | 0.71 | 0.73 | 1.26 | 0.92 | 1.02 | 0.91 | 0.58 | 0.37 | 0.63 | 0.71 | 1.71 | 0.23  |
| 504 | c | 1.00 | 1.10 | 1.09 | 1.00 | 0.89 | 0.89 | 0.87 | 0.87 | 3.16 | 4.15 | 4.03 | 3.61 | 1.43 | 1.19 | 1.22 | 1.19 | 0.73 | -0.14 |
| 505 | a | 1.00 | 1.06 | 0.99 | 0.96 | 0.89 | 0.62 | 0.64 | 0.70 | 1.25 | 0.71 | 0.81 | 0.75 | 0.69 | 0.50 | 0.70 | 0.76 | 1.84 | 0.26  |
| 506 | a | 1.00 | 1.20 | 1.04 | 0.89 | 1.19 | 1.20 | 1.12 | 1.29 | 2.20 | 2.94 | 2.90 | 2.61 | 2.58 | 2.46 | 2.38 | 2.13 | 0.69 | -0.16 |
| 507 | a | 1.00 | 1.05 | 0.96 | 0.97 | 1.04 | 1.11 | 0.96 | 1.17 | 3.80 | 4.74 | 4.72 | 4.14 | 0.82 | 0.75 | 0.81 | 0.81 | 0.90 | -0.04 |
| 508 | t | 1.00 | 1.26 | 1.17 | 1.21 | 2.02 | 1.95 | 1.50 | 1.80 | 4.32 | 5.20 | 5.04 | 4.47 | 1.28 | 1.26 | 1.30 | 1.32 | 1.00 | 0.00  |
| 509 | g | 1.00 | 1.22 | 1.15 | 0.99 | 2.38 | 2.78 | 2.41 | 1.97 | 3.53 | 3.93 | 3.69 | 3.49 | 0.81 | 0.71 | 0.90 | 0.97 | 1.21 | 0.08  |
| 510 | a | 1.00 | 1.09 | 1.04 | 0.96 | 8.95 | 7.71 | 8.61 | 7.45 | 1.53 | 1.49 | 1.84 | 1.48 | 0.74 | 0.58 | 0.83 | 0.90 | 1.26 | 0.10  |
| 511 | c | 1.00 | 1.08 | 1.01 | 0.96 | 1.24 | 1.34 | 0.86 | 1.15 | 2.72 | 2.93 | 2.84 | 2.57 | 0.76 | 0.68 | 0.75 | 0.90 | 1.25 | 0.10  |
| 512 | c | 1.00 | 1.12 | 0.98 | 1.05 | 0.72 | 0.67 | 0.64 | 0.75 | 1.14 | 0.97 | 1.09 | 0.99 | 0.83 | 0.80 | 0.86 | 0.99 | 1.37 | 0.14  |
| 513 | c | 1.00 | 1.28 | 1.10 | 1.12 | 1.03 | 0.94 | 0.99 | 0.96 | 0.82 | 0.80 | 0.95 | 0.85 | 0.80 | 0.71 | 0.88 | 1.06 | 1.27 | 0.10  |
| 514 | c | 1.00 | 1.16 | 1.15 | 1.02 | 1.01 | 0.98 | 1.03 | 1.01 | 0.63 | 0.70 | 0.77 | 0.70 | 0.65 | 0.48 | 0.72 | 0.87 | 1.20 | 0.0   |

|     |   |      |      |      |      |      |      |      |      |      |      |      |      |      |      |      |      |      |       |
|-----|---|------|------|------|------|------|------|------|------|------|------|------|------|------|------|------|------|------|-------|
| 522 | c | 1.00 | 0.92 | 1.01 | 1.14 | 0.93 | 0.97 | 0.85 | 0.93 | 1.13 | 0.79 | 0.89 | 0.97 | 2.47 | 3.43 | 2.18 | 1.87 | 0.89 | -0.05 |
| 523 | t | 1.00 | 0.85 | 0.94 | 1.09 | 0.73 | 0.80 | 0.78 | 0.72 | 0.69 | 0.66 | 0.64 | 0.71 | 1.72 | 2.59 | 1.61 | 1.53 | 0.86 | -0.07 |
| 524 | a | 1.00 | 0.93 | 1.07 | 1.27 | 0.84 | 0.75 | 0.89 | 0.81 | 1.11 | 0.58 | 0.64 | 0.65 | 0.70 | 1.03 | 0.79 | 0.85 | 2.10 | 0.32  |
| 525 | c | 1.00 | 0.85 | 0.83 | 1.07 | 0.93 | 0.97 | 1.02 | 1.03 | 2.78 | 2.50 | 2.11 | 2.32 | 1.51 | 2.53 | 1.65 | 1.35 | 1.07 | 0.03  |
| 526 | a | 1.00 | 0.75 | 0.81 | 0.96 | 0.58 | 0.55 | 0.52 | 0.51 | 0.90 | 0.40 | 0.40 | 0.51 | 0.42 | 0.57 | 0.45 | 0.54 | 2.32 | 0.36  |
| 527 | t | 1.00 | 0.59 | 0.72 | 0.88 | 0.75 | 0.83 | 0.88 | 0.81 | 2.59 | 2.17 | 1.67 | 1.97 | 0.97 | 1.48 | 0.89 | 0.81 | 1.10 | 0.04  |
| 528 | c | 1.00 | 0.57 | 0.80 | 0.71 | 0.56 | 0.70 | 0.67 | 0.66 | 1.40 | 1.41 | 0.78 | 0.98 | 1.38 | 2.30 | 0.85 | 0.92 | 0.95 | -0.02 |
| 529 | a | 1.00 | 0.67 | 0.98 | 0.79 | 0.52 | 0.52 | 0.50 | 0.84 | 0.49 | 0.36 | 0.50 | 0.62 | 0.73 | 0.55 | 0.60 | 1.63 | 0.21 |       |
| 530 | c | 1.00 | 0.67 | 0.94 | 0.61 | 0.55 | 0.69 | 0.59 | 0.70 | 1.33 | 1.10 | 0.81 | 1.01 | 1.27 | 1.91 | 0.70 | 0.89 | 0.92 | -0.04 |
| 531 | t | 1.00 | 0.68 | 1.13 | 0.75 | 0.54 | 0.59 | 0.68 | 0.61 | 0.52 | 0.41 | 0.38 | 0.49 | 0.86 | 1.01 | 0.58 | 0.66 | 0.83 | -0.08 |
| 532 | c | 1.00 | 0.69 | 1.04 | 0.54 | 0.48 | 0.64 | 0.56 | 0.65 | 0.58 | 0.42 | 0.45 | 0.51 | 2.29 | 3.28 | 1.05 | 1.38 | 0.68 | -0.17 |
| 533 | t | 1.00 | 0.77 | 1.08 | 0.74 | 0.55 | 0.78 | 0.66 | 0.67 | 0.65 | 0.50 | 0.50 | 0.60 | 1.00 | 1.42 | 0.58 | 0.95 | 1.02 | 0.01  |
| 534 | c | 1.00 | 0.87 | 1.13 | 0.92 | 0.87 | 0.93 | 0.76 | 0.81 | 0.59 | 0.44 | 0.52 | 0.69 | 2.26 | 4.15 | 1.64 | 2.12 | 0.80 | -0.10 |
| 535 | t | 1.00 | 0.76 | 0.72 | 0.77 | 0.53 | 0.45 | 0.46 | 0.44 | 0.53 | 0.58 | 0.42 | 0.45 | 1.20 | 2.85 | 1.64 | 1.56 | 1.53 | 0.18  |
| 536 | g | 1.00 | 0.79 | 0.69 | 0.81 | 0.55 | 0.66 | 0.35 | 0.29 | 0.24 | 0.29 | 0.26 | 0.34 | 0.34 | 0.85 | 0.52 | 0.57 | 1.19 | 0.08  |
| 537 | a | 1.00 | 0.94 | 0.62 | 0.80 | 0.40 | 0.18 | 0.82 | 1.02 | 0.30 | 0.27 | 0.18 | 0.26 | 0.46 | 0.96 | 0.44 | 0.46 | 1.12 | 0.05  |
| 538 | g | 1.00 | 0.95 | 0.87 | 1.24 | 1.64 | 2.86 | 2.58 | 2.04 | 0.18 | 0.32 | 0.35 | 0.62 | 0.31 | 0.83 | 0.49 | 0.59 | 0.55 | -0.26 |
| 539 | g | -    | -    | -    | -    | -    | -    | -    | -    | -    | -    | -    | -    | -    | -    | -    | -    | -    | -     |
| 540 | a | -    | -    | -    | -    | -    | -    | -    | -    | -    | -    | -    | -    | -    | -    | -    | -    | -    | -     |
| 541 | c | -    | -    | -    | -    | -    | -    | -    | -    | -    | -    | -    | -    | -    | -    | -    | -    | -    | -     |
| 542 | t | -    | -    | -    | -    | -    | -    | -    | -    | -    | -    | -    | -    | -    | -    | -    | -    | -    | -     |
| 543 | a | -    | -    | -    | -    | -    | -    | -    | -    | -    | -    | -    | -    | -    | -    | -    | -    | -    | -     |
| 544 | a | -    | -    | -    | -    | -    | -    | -    | -    | -    | -    | -    | -    | -    | -    | -    | -    | -    | -     |
| 545 | a | -    | -    | -    | -    | -    | -    | -    | -    | -    | -    | -    | -    | -    | -    | -    | -    | -    | -     |
| 546 | a | -    | -    | -    | -    | -    | -    | -    | -    | -    | -    | -    | -    | -    | -    | -    | -    | -    | -     |
| 547 | c | -    | -    | -    | -    | -    | -    | -    | -    | -    | -    | -    | -    | -    | -    | -    | -    | -    | -     |
| 548 | t | -    | -    | -    | -    | -    | -    | -    | -    | -    | -    | -    | -    | -    | -    | -    | -    | -    | -     |
| 549 | g | -    | -    | -    | -    | -    | -    | -    | -    | -    | -    | -    | -    | -    | -    | -    | -    | -    | -     |
| 550 | c | -    | -    | -    | -    | -    | -    | -    | -    | -    | -    | -    | -    | -    | -    | -    | -    | -    | -     |
| 551 | a | -    | -    | -    | -    | -    | -    | -    | -    | -    | -    | -    | -    | -    | -    | -    | -    | -    | -     |
| 552 | c | -    | -    | -    | -    | -    | -    | -    | -    | -    | -    | -    | -    | -    | -    | -    | -    | -    | -     |
| 553 | c | -    | -    | -    | -    | -    | -    | -    | -    | -    | -    | -    | -    | -    | -    | -    | -    | -    | -     |
| 554 | t | -    | -    | -    | -    | -    | -    | -    | -    | -    | -    | -    | -    | -    | -    | -    | -    | -    | -     |
| 555 | t | -    | -    | -    | -    | -    | -    | -    | -    | -    | -    | -    | -    | -    | -    | -    | -    | -    | -     |
| 556 | c | -    | -    | -    | -    | -    | -    | -    | -    | -    | -    | -    | -    | -    | -    | -    | -    | -    | -     |
| 557 | c | -    | -    | -    | -    | -    | -    | -    | -    | -    | -    | -    | -    | -    | -    | -    | -    | -    | -     |
| 558 | t | -    | -    | -    | -    | -    | -    | -    | -    | -    | -    | -    | -    | -    | -    | -    | -    | -    | -     |
| 559 | t | -    | -    | -    | -    | -    | -    | -    | -    | -    | -    | -    | -    | -    | -    | -    | -    | -    | -     |
| 560 | c | -    | -    | -    | -    | -    | -    | -    | -    | -    | -    | -    | -    | -    | -    | -    | -    | -    | -     |
| 561 | t | -    | -    | -    | -    | -    | -    | -    | -    | -    | -    | -    | -    | -    | -    | -    | -    | -    | -     |
| 562 | c | -    | -    | -    | -    | -    | -    | -    | -    | -    | -    | -    | -    | -    | -    | -    | -    | -    | -     |
| 563 | t | -    | -    | -    | -    | -    | -    | -    | -    | -    | -    | -    | -    | -    | -    | -    | -    | -    | -     |
| 564 | c | -    | -    | -    | -    | -    | -    | -    | -    | -    | -    | -    | -    | -    | -    | -    | -    | -    | -     |
| 565 | t | -    | -    | -    | -    | -    | -    | -    | -    | -    | -    | -    | -    | -    | -    | -    | -    | -    | -     |
| 566 | c | -    | -    | -    | -    | -    | -    | -    | -    | -    | -    | -    | -    | -    | -    | -    | -    | -    | -     |
| 567 | c | -    | -    | -    | -    | -    | -    | -    | -    | -    | -    | -    | -    | -    | -    | -    | -    | -    | -     |
| 568 | c | -    | -    | -    | -    | -    | -    | -    | -    | -    | -    | -    | -    | -    | -    | -    | -    | -    | -     |
| 569 | t | -    | -    | -    | -    | -    | -    | -    | -    | -    | -    | -    | -    | -    | -    | -    | -    | -    | -     |
| 570 | g | -    | -    | -    | -    | -    | -    | -    | -    | -    | -    | -    | -    | -    | -    | -    | -    | -    | -     |
| 571 | c | -    | -    | -    | -    | -    | -    | -    | -    | -    | -    | -    | -    | -    | -    | -    | -    | -    | -     |
| 572 | a | -    | -    | -    | -    | -    | -    | -    | -    | -    | -    | -    | -    | -    | -    | -    | -    | -    | -     |
| 573 | g | -    | -    | -    | -    | -    | -    | -    | -    | -    | -    | -    | -    | -    | -    | -    | -    | -    | -     |
| 574 | G | -    | -    | -    | -    | -    | -    | -    | -    | -    | -    | -    | -    | -    | -    | -    | -    | -    | -     |
| 575 | A | -    | -    | -    | -    | -    | -    | -    | -    | -    | -    | -    | -    | -    | -    | -    | -    | -    | -     |
| 576 | T | -    | -    | -    | -    | -    | -    | -    | -    | -    | -    | -    | -    | -    | -    | -    | -    | -    | -     |
| 577 | A | -    | -    | -    | -    | -    | -    | -    | -    | -    | -    | -    | -    | -    | -    | -    | -    | -    | -     |
| 578 | C | -    | -    | -    | -    | -    | -    | -    | -    | -    | -    | -    | -    | -    | -    | -    | -    | -    | -     |
| 579 | T | -    | -    | -    | -    | -    | -    | -    | -    | -    | -    | -    | -    | -    | -    | -    | -    | -    | -     |
| 580 | T | -    | -    | -    | -    | -    | -    | -    | -    | -    | -    | -    | -    | -    | -    | -    | -    | -    | -     |
| 581 | T | -    | -    | -    | -    | -    | -    | -    | -    | -    | -    | -    | -    | -    | -    | -    | -    | -    | -     |
| 582 | T | -    | -    | -    | -    | -    | -    | -    | -    | -    | -    | -    | -    | -    | -    | -    | -    | -    | -     |
| 583 | G | -    | -    | -    | -    | -    | -    | -    | -    | -    | -    | -    | -    | -    | -    | -    | -    | -    | -     |
| 584 | T | -    | -    | -    | -    | -    | -    | -    | -    | -    | -    | -    | -    | -    | -    | -    | -    | -    | -     |
| 585 | G | -    | -    | -    | -    | -    | -    | -    | -    | -    | -    | -    | -    | -    | -    | -    | -    | -    | -     |
| 586 | G | -    | -    | -    | -    | -    | -    | -    | -    | -    | -    | -    | -    | -    | -    | -    | -    | -    | -     |
| 587 | A | -    | -    | -    | -    | -    | -    | -    | -    | -    | -    | -    | -    | -    | -    | -    | -    | -    | -     |
| 588 | A | -    | -    | -    | -    | -    | -    | -    | -    | -    | -    | -    | -    | -    | -    | -    | -    | -    | -     |
| 589 | C | -    | -    | -    | -    | -    | -    | -    | -    | -    | -    | -    | -    | -    | -    | -    | -    | -    | -     |
| 590 | T | -    | -    | -    | -    | -    | -    | -    | -    | -    | -    | -    | -    | -    | -    | -    | -    | -    | -     |
| 591 | C | -    | -    | -    | -    | -    | -    | -    | -    | -    | -    | -    | -    | -    | -    | -    | -    | -    | -     |
| 592 | T | -    | -    | -    | -    | -    | -    | -    | -    | -    | -    | -    | -    | -    | -    | -    | -    | -    | -     |
| 593 | A | -    | -    | -    | -    | -    | -    | -    | -    | -    | -    | -    | -    | -    | -    | -    | -    | -    | -     |
| 594 | T | -    | -    | -    | -    | -    | -    | -    | -    | -    | -    | -    | -    | -    | -    | -    | -    | -    | -     |
| 595 | G | 1.00 | 1.20 | 1.10 | 1.36 | 2.57 | 2.48 | 2.57 | 1.82 | 1.70 | 1.43 | 1.97 | 1.84 | 1.02 | 0.65 | 1.16 | 0.88 | 0.80 | -0.10 |
| 596 | G | 1.00 | 1.27 | 0.94 | 1.07 | 2.43 | 2.35 | 2.20 | 1.72 | 0.49 | 0.78 | 0.45 | 0.74 | 0.28 | 0.14 | 0.18 | 0.12 | 0.27 | -0.57 |
| 597 | G | 1.00 | 1.27 | 1.08 | 0.88 | 5.61 | 6.98 | 3.74 | 3.20 | 1.07 | 0.97 | 1.42 | 0.86 | 0.75 | 0.36 | 0.58 | 0.63 | 1.03 | 0.01  |



|     |   |      |      |      |      |      |      |      |      |      |      |      |      |      |      |      |      |      |       |
|-----|---|------|------|------|------|------|------|------|------|------|------|------|------|------|------|------|------|------|-------|
| 598 | A | 1.00 | 0.72 | 1.01 | 1.10 | 0.83 | 0.94 | 3.27 | 1.18 | 1.41 | 1.57 | 1.58 | 2.05 | 2.68 | 1.52 | 3.28 | 3.62 | 0.93 | -0.03 |
| 599 | A | 1.00 | 1.01 | 1.21 | 1.27 | 1.24 | 1.12 | 1.48 | 1.05 | 1.25 | 1.50 | 1.57 | 2.06 | 0.71 | 0.11 | 2.11 | 2.39 | 2.03 | 0.31  |
| 600 | C | 1.00 | 1.08 | 0.44 | 0.15 | 0.57 | 0.36 | 0.09 | 0.07 | 0.76 | 0.14 | 0.35 | 0.55 | 0.31 | 0.12 | 0.26 | 0.09 | 0.38 | -0.42 |
| 601 | A | 1.00 | 0.78 | 3.68 | 6.07 | 1.09 | 1.35 | 2.38 | 1.44 | 1.92 | 2.26 | 2.27 | 0.00 | 3.06 | 1.73 | 2.12 | 3.41 |      |       |
| 602 | A | 1.00 | 1.09 | 1.53 | 1.61 | 0.79 | 0.68 | 0.65 | 0.67 | 1.65 | 1.38 | 1.39 | 1.11 | 1.45 | 0.76 | 1.15 | 1.46 | 1.49 | 0.17  |
| 603 | T | 1.00 | 1.00 | 0.81 | 1.38 | 0.66 | 0.52 | 0.41 | 0.51 | 1.36 | 1.42 | 1.33 | 1.67 | 0.64 | 0.79 | 1.59 | 1.42 | 1.79 | 0.25  |
| 604 | G | 1.00 | 0.74 | 0.72 | 0.91 | 0.41 | 0.44 | 0.37 | 0.31 | 0.94 | 0.74 | 0.82 | 0.71 | 0.75 | 0.43 | 0.76 | 0.77 | 1.36 | 0.13  |
| 605 | C | 1.00 | 1.03 | 0.89 | 0.92 | 4.07 | 4.97 | 3.89 | 2.00 | 1.79 | 1.13 | 2.56 | 1.01 | 2.03 | 0.95 | 0.93 | 1.14 | 1.00 | 0.00  |
| 606 | A | 1.00 | 1.48 | 1.43 | 1.42 | 0.99 | 0.62 | 0.54 | 0.38 | 1.13 | 0.47 | 0.36 | 0.55 | 0.54 | 0.22 | 0.64 | 0.72 | 2.72 | 0.44  |
| 607 | G | 1.00 | 0.38 | 1.63 | 1.12 | 0.31 | 0.28 | 0.19 | 0.39 | 1.50 | 1.18 | 1.61 | 1.28 | 2.42 | 1.72 | 2.32 | 2.36 | 1.14 | 0.06  |
| 608 | C | 1.00 | 0.63 | 0.03 | 0.33 | 2.60 | 1.98 | 3.08 | 1.76 | 0.47 | 0.87 | 1.27 | 0.78 | 0.93 | 0.69 | 0.94 | 1.19 | 0.78 | -0.11 |
| 609 | A | 1.00 | 1.20 | 0.90 | 0.88 | 0.74 | 0.45 | 0.28 | 0.31 | 1.44 | 0.50 | 0.47 | 0.65 | 0.82 | 0.41 | 0.76 | 0.79 | 2.13 | 0.33  |
| 610 | G | 1.00 | 0.93 | 0.99 | 1.70 | 2.31 | 3.11 | 1.18 | 1.24 | 0.83 | 1.26 | 1.35 | 1.21 | 2.24 | 1.89 | 2.82 | 2.68 | 0.82 | -0.09 |
| 611 | C | 1.00 | 0.79 | 1.24 | 1.09 | 2.01 | 1.22 | 4.01 | 2.53 | 0.38 | 0.86 | 1.29 | 0.81 | 0.66 | 2.95 | 1.09 | 0.91 | 0.65 | -0.19 |
| 612 | C | 1.00 | 1.27 | 1.18 | 1.24 | 0.98 | 0.79 | 0.82 | 0.68 | 1.08 | 0.85 | 0.97 | 0.95 | 4.27 | 1.55 | 3.75 | 3.95 | 1.05 | 0.02  |
| 613 | G | 1.00 | 0.98 | 0.95 | 0.99 | 0.61 | 0.41 | 0.51 | 0.40 | 0.86 | 0.78 | 0.77 | 0.92 | 2.67 | 1.98 | 2.97 | 2.84 | 0.98 | -0.01 |
| 614 | A | 1.00 | 0.93 | 0.96 | 1.05 | 3.06 | 3.08 | 3.53 | 2.36 | 0.49 | 0.69 | 2.94 | 0.89 | 3.53 | 3.28 | 3.95 | 3.35 | 0.52 | -0.29 |
| 615 | G | 1.00 | 1.07 | 1.03 | 1.00 | 1.16 | 1.01 | 0.81 | 1.60 | 2.41 | 3.27 | 1.97 | 4.22 | 1.40 | 1.29 | 1.45 | 1.26 | 0.51 | -0.29 |
| 616 | A | 1.00 | 1.05 | 1.03 | 1.08 | 6.80 | 7.40 | 8.65 | 6.70 | 0.90 | 0.92 | 1.26 | 1.31 | 0.76 | 0.60 | 0.84 | 0.95 | 0.86 | -0.07 |
| 617 | G | 1.00 | 1.12 | 0.82 | 1.02 | 0.76 | 1.01 | 0.52 | 0.62 | 1.98 | 2.67 | 2.85 | 2.85 | 0.60 | 0.48 | 0.69 | 0.70 | 0.81 | -0.09 |
| 618 | C | 1.00 | 1.11 | 1.32 | 1.33 | 2.81 | 2.93 | 2.97 | 2.22 | 0.74 | 0.64 | 0.79 | 0.65 | 0.68 | 0.36 | 0.83 | 1.01 | 1.70 | 0.23  |
| 619 | C | 1.00 | 1.19 | 1.14 | 1.25 | 0.67 | 0.63 | 0.67 | 0.50 | 0.75 | 0.67 | 0.68 | 0.65 | 1.04 | 0.74 | 1.11 | 1.11 | 1.22 | 0.09  |
| 620 | G | 1.00 | 1.09 | 1.03 | 0.96 | 0.55 | 0.53 | 0.63 | 0.47 | 0.69 | 0.71 | 0.63 | 0.62 | 0.74 | 0.46 | 0.80 | 0.85 | 1.27 | 0.10  |
| 621 | A | 1.00 | 1.13 | 0.97 | 1.15 | 2.99 | 3.58 | 3.56 | 3.49 | 0.77 | 0.84 | 1.11 | 0.95 | 0.99 | 0.82 | 1.19 | 1.22 | 0.99 | 0.00  |
| 622 | A | 1.00 | 1.14 | 1.09 | 1.21 | 0.72 | 0.79 | 0.74 | 0.90 | 2.40 | 3.55 | 3.21 | 3.57 | 0.74 | 0.60 | 0.79 | 1.00 | 0.91 | -0.04 |
| 623 | A | 1.00 | 1.18 | 1.02 | 1.15 | 0.63 | 0.52 | 0.77 | 0.83 | 1.95 | 2.67 | 3.09 | 3.07 | 0.75 | 0.64 | 0.86 | 0.97 | 0.82 | -0.09 |
| 624 | G | 1.00 | 1.08 | 0.96 | 1.00 | 0.64 | 0.58 | 0.77 | 0.92 | 3.40 | 5.13 | 5.54 | 6.29 | 0.66 | 0.61 | 0.77 | 0.80 | 0.65 | -0.18 |
| 625 | G | 1.00 | 1.06 | 1.01 | 0.98 | 2.83 | 3.01 | 2.50 | 1.99 | 0.86 | 1.13 | 1.31 | 0.94 | 0.68 | 0.59 | 0.77 | 0.94 | 1.28 | 0.11  |
| 626 | G | 1.00 | 1.17 | 1.11 | 1.06 | 1.64 | 1.80 | 1.72 | 1.27 | 0.75 | 0.74 | 0.76 | 0.68 | 0.85 | 0.55 | 0.87 | 1.03 | 1.34 | 0.13  |
| 627 | C | 1.00 | 1.20 | 1.19 | 1.14 | 1.14 | 1.21 | 1.17 | 0.85 | 0.73 | 0.75 | 0.80 | 0.74 | 0.62 | 0.41 | 0.74 | 0.93 | 1.49 | 0.17  |
| 628 | C | 1.00 | 1.17 | 1.14 | 1.12 | 0.71 | 0.77 | 0.89 | 0.58 | 0.70 | 0.74 | 0.66 | 0.70 | 1.27 | 0.96 | 1.30 | 1.35 | 1.07 | 0.03  |
| 629 | A | 1.00 | 1.41 | 1.26 | 1.20 | 0.84 | 0.60 | 0.65 | 0.50 | 1.24 | 0.67 | 0.60 | 0.63 | 2.33 | 2.05 | 2.39 | 2.31 | 1.93 | 0.29  |
| 630 | G | 1.00 | 1.12 | 1.12 | 1.13 | 0.87 | 0.77 | 0.88 | 0.80 | 0.70 | 0.87 | 0.79 | 0.85 | 2.87 | 2.64 | 2.86 | 2.52 | 0.72 | -0.14 |
| 631 | G | 1.00 | 1.18 | 1.09 | 0.98 | 0.79 | 0.67 | 0.89 | 0.78 | 0.69 | 0.87 | 0.68 | 0.80 | 0.98 | 1.00 | 1.00 | 0.97 | 0.85 | -0.07 |
| 632 | A | 1.00 | 1.26 | 1.06 | 1.19 | 3.07 | 4.32 | 3.80 | 2.78 | 0.87 | 0.92 | 0.90 | 1.16 | 0.55 | 0.49 | 0.72 | 0.83 | 1.13 | 0.05  |
| 633 | A | 1.00 | 1.34 | 0.96 | 1.10 | 0.74 | 0.74 | 0.77 | 0.79 | 3.58 | 4.55 | 3.96 | 4.36 | 1.19 | 1.08 | 1.41 | 1.51 | 1.05 | 0.02  |
| 634 | C | 1.00 | 1.37 | 0.99 | 1.13 | 0.91 | 1.45 | 1.35 | 1.10 | 4.19 | 4.78 | 4.57 | 5.25 | 2.13 | 2.08 | 2.36 | 2.25 | 0.85 | -0.07 |
| 635 | G | 1.00 | 1.19 | 0.90 | 0.93 | 0.77 | 1.04 | 0.98 | 0.88 | 2.12 | 2.64 | 2.04 | 2.28 | 0.92 | 0.94 | 0.93 | 0.92 | 0.94 | -0.03 |
| 636 | C | 1.00 | 1.30 | 0.98 | 1.07 | 7.91 | 9.87 | 7.91 | 6.02 | 1.61 | 1.83 | 1.52 | 1.59 | 1.00 | 1.40 | 1.13 | 1.13 | 1.14 | 0.06  |
| 637 | T | 1.00 | 1.23 | 0.98 | 1.07 | 0.61 | 0.45 | 0.54 | 0.45 | 2.37 | 2.85 | 2.26 | 2.45 | 0.65 | 0.50 | 0.70 | 0.76 | 1.13 | 0.05  |
| 638 | T | 1.00 | 1.25 | 1.03 | 1.16 | 0.78 | 0.68 | 0.74 | 0.81 | 3.02 | 3.84 | 2.92 | 3.14 | 1.54 | 2.28 | 1.99 | 2.10 | 1.31 | 0.12  |
| 639 | C | 1.00 | 1.35 | 1.12 | 1.27 | 0.95 | 0.88 | 0.92 | 1.08 | 3.70 | 4.81 | 3.81 | 4.04 | 2.47 | 3.97 | 2.43 | 2.30 | 0.85 | -0.07 |
| 640 | A | 1.00 | 1.10 | 1.02 | 0.99 | 0.75 | 0.77 | 0.58 | 0.45 | 1.36 | 1.10 | 0.94 | 1.03 | 0.67 | 0.67 | 0.69 | 0.74 | 1.46 | 0.16  |
| 641 | A | 1.00 | 1.13 | 1.00 | 1.12 | 0.71 | 0.80 | 0.89 | 1.04 | 2.72 | 3.84 | 3.07 | 3.74 | 1.15 | 1.73 | 1.20 | 1.21 | 0.77 | -0.11 |
| 642 | C | 1.00 | 1.20 | 0.98 | 1.58 | 0.79 | 0.70 | 0.98 | 1.15 | 4.68 | 6.06 | 5.08 | 5.60 | 0.89 | 0.98 | 0.99 | 1.10 | 1.03 | 0.01  |
| 643 | C | 1.00 | 1.14 | 1.15 | 0.99 | 1.06 | 0.99 | 1.06 | 1.15 | 1.21 | 1.24 | 1.23 | 1.31 | 1.03 | 1.06 | 1.16 | 1.06 | 0.95 | -0.02 |
| 644 | G | 1.00 | 0.96 | 0.95 | 0.95 | 0.65 | 0.79 | 0.72 | 0.94 | 1.05 | 1.35 | 1.12 | 1.11 | 0.70 | 0.67 | 0.73 | 0.72 | 0.97 | -0.01 |
| 645 | C | 1.00 | 0.91 | 0.93 | 1.05 | 3.54 | 4.23 | 3.83 | 2.46 | 0.61 | 0.79 | 0.57 | 0.70 | 0.89 | 0.91 | 0.80 | 0.97 | 0.94 | -0.03 |
| 646 | T | 1.00 | 1.08 | 1.14 | 1.25 | 0.72 | 0.51 | 0.50 | 0.63 | 0.94 | 0.91 | 0.69 | 0.94 | 0.91 | 0.90 | 0.90 | 1.05 | 1.16 | 0.06  |
| 647 | G | 1.00 | 0.93 | 0.87 | 0.73 | 0.53 | 0.60 | 0.64 | 1.04 | 0.60 | 0.73 | 0.65 | 0.71 | 0.64 | 0.60 | 0.69 | 0.66 | 0.86 | -0.06 |
| 648 | G | 1.00 | 0.94 | 0.97 | 1.03 | 0.74 | 0.69 | 0.77 | 0.64 | 0.71 | 0.82 | 0.60 | 0.74 | 0.69 | 0.61 | 0.78 | 0.77 | 1.06 | 0.03  |
| 649 | T | 1.00 | 0.93 | 0.96 | 0.98 | 0.70 | 0.73 | 0.74 | 0.78 | 0.56 | 0.70 | 0.61 | 0.65 | 0.49 | 0.36 | 0.56 | 0.61 | 1.07 | 0.03  |
| 650 | T | 1.00 | 0.92 | 0.94 | 0.99 | 0.62 | 0.64 | 0.71 | 0.77 | 0.53 | 0.68 | 0.59 | 0.62 | 0.66 | 0.71 | 0.67 | 0.64 | 0.84 | -0.07 |
| 651 | C | 1.00 | 1.01 | 1.02 | 0.98 | 0.80 | 0.83 | 0.95 | 1.07 | 0.85 | 0.83 | 0.68 | 0.82 | 1.76 | 2.37 | 1.83 | 1.78 | 1.04 | 0.02  |
| 652 | C | 1.00 | 1.02 | 1.13 | 1.14 | 0.91 | 0.81 | 0.85 | 0.84 | 0.73 | 0.78 | 0.75 | 0.73 | 1.84 | 2.25 | 1.72 | 1.60 | 0.87 | -0.06 |
| 653 | T | 1.00 | 0.98 | 0.96 | 0.94 | 0.60 | 0.62 | 0.65 | 0.68 | 0.58 | 0.61 | 0.59 | 0.57 | 0.62 | 0.51 | 0.64 | 0.65 | 1.07 | 0.03  |
| 654 | G | 1.00 | 1.10 | 1.12 | 1.15 | 1.61 | 1.52 | 1.41 | 1.68 | 0.68 | 0.79 | 0.72 | 0.78 | 0.77 | 0.64 | 0.72 | 0.89 | 1.00 | 0.00  |
| 655 | A | 1.00 | 1.00 | 0.98 | 1.10 | 0.75 | 0.68 | 0.70 | 1.01 | 0.92 | 1.20 | 1.10 | 1.18 | 1.14 | 1.72 | 1.04 | 0.99 | 0.67 | -0.17 |
| 656 | C | 1.00 | 1.02 | 0.98 | 0.90 | 0.53 | 0.38 | 0.35 | 0.61 | 0.81 | 0.72 | 0.71 | 0.67 | 1.14 | 2.10 | 1.06 | 1.01 | 1.08 | 0.03  |
| 657 | G | 1.00 | 0.80 | 0.92 | 0.84 | 0.74 | 0.86 | 0.92 | 0.96 | 0.47 | 0.63 | 0.61 | 0.71 | 1.53 | 2.63 | 1.37 | 1.17 | 0.50 | -0.30 |
| 658 | G | 1.00 | 0.98 | 1.19 | 1.18 | 1.01 | 0.98 | 1.16 | 0.98 | 0.74 | 0.68 | 0.85 | 0.68 | 0.75 | 0.55 | 0.77 | 0.88 | 1.27 | 0.10  |
| 659 | G | 1.00 | 0.83 | 0.97 | 0.87 | 0.82 | 0.84 | 0.91 | 0.71 | 0.52 | 0.62 | 0.59 | 0.59 | 0.74 | 0.98 | 0.72 | 0.60 | 0.73 | -0.14 |
| 660 | C | 1.00 | 0.87 | 1.05 | 1.05 | 0.63 | 0.48 | 0.43 | 0.39 | 0.98 | 0.49 | 0.54 | 0.45 | 0.44 | 0.53 | 0.50 | 0.54 | 2.70 | 0.43  |
| 661 | A | 1.00 | 0.70 | 0.75 | 0.67 | 0.57 | 0.50 | 0.49 | 0.78 | 0.59 | 0.62 | 0.78 | 0.62 | 1.83 | 2.44 | 1.54 | 1.32 | 0.69 | -0.16 |
| 662 | T | 1.00 | 0.80 | 0.91 | 0.80 | 0.62 | 0.58 | 0.78 | 2.23 | 0.71 | 0.87 | 1.10 | 0.95 | 0.90 | 0.79 | 0.68 | 0.75 | 0.62 | -0.21 |

Average -0.001073123  
Standard Deviation 0.199782384

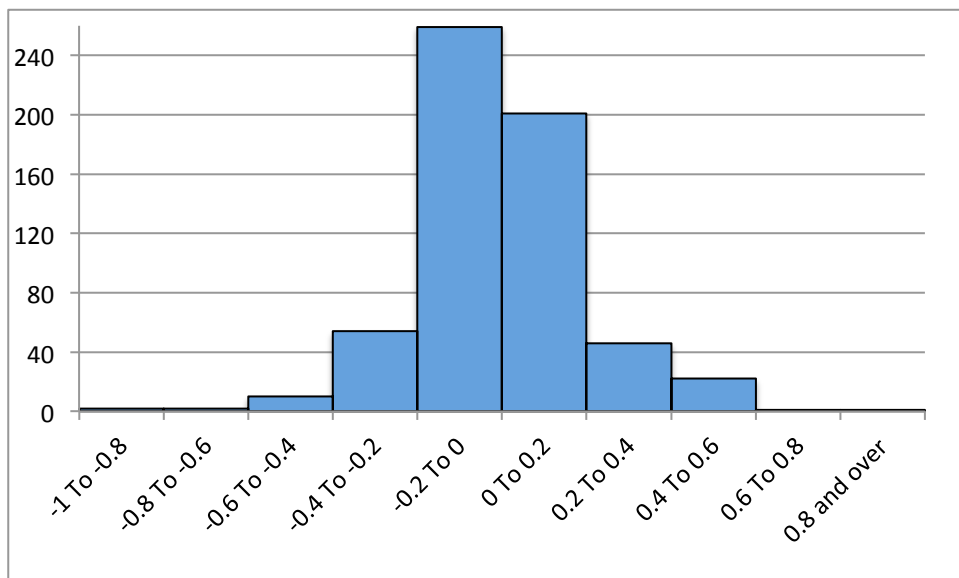

**Index frequency:**

|              |     |
|--------------|-----|
| -1 To -0.8   | 2   |
| -0.8 To -0.6 | 2   |
| -0.6 To -0.4 | 10  |
| -0.4 To -0.2 | 54  |
| -0.2 To 0    | 259 |
| 0 To 0.2     | 201 |
| 0.2 To 0.4   | 46  |
| 0.4 To 0.6   | 22  |
| 0.6 To 0.8   | 1   |
| 0.8 and over | 1   |
